# Supplementary material for: The transition state and regulation of γ-TuRC-mediated microtubule nucleation revealed by single molecule microscopy
Source: eLife. 2020 Jun 15;9:e54253. doi: 10.7554/eLife.54253 (PMC7338055; doi:10.7554/eLife.54253)
Supplement: Figure 2—source data 1. — Each excel sheet is labelled with individual figure panel. For Figure 2C, all three experimental replicates are supplied, and dataset one is plotted. [file elife-54253-fig2-data1.xlsx]

## Sheet: Figure 2B
g-TuRC nucleation assay - Growth speed data
g-TuRC nucleation assay
Tubulin concentration (uM)	Growth speed (um/min)
7	1.29
7	1.53
7	0.63
7	1.092
7	1.4502
7	1.2822
7	1.17
7	1.116
7	1.152
10.5	1.746
10.5	1.4328
10.5	1.926
10.5	1.878
10.5	1.4832
10.5	1.836
10.5	1.8576
10.5	1.7604
10.5	2.022
10.5	1.986
10.5	1.998
10.5	1.22196
10.5	1.6542
10.5	1.785
10.5	1.962
10.5	1.656
10.5	1.866
10.5	1.146
10.5	2.166
10.5	2.2008
10.5	1.554
10.5	1.83
10.5	1.3182
10.5	2.376
10.5	2.052
10.5	1.9848
10.5	1.7502
10.5	1.77396
14	2.2788
14	2.454
14	2.508
14	2.1762
14	2.8002
14	2.622
14	2.166
14	2.562
14	2.064
14	2.2398
14	2.838
14	2.436
14	2.73
14	3.288
14	2.433
14	2.2068
14	2.16396
14	3.03
14	2.7276
14	2.5074
14	1.806
14	3.1536
14	2.292
14	1.932
14	2.232
14	2.526
14	2.298
14	1.92
14	2.532
14	2.1174
14	2.472
17.5	3.9228
17.5	2.691
17.5	3.234
17.5	3.132
17.5	3.0846
17.5	2.892
17.5	3.276
17.5	2.934
17.5	3.15
17.5	3.9
17.5	3.246
17.5	3.48
17.5	2.814
17.5	3.1134
17.5	3.942
17.5	2.862
17.5	3.72
17.5	3.222
21	3.027
21	3.702
21	4.5
21	3.6402
21	3.732
21	4.026
21	4.608
21	3.798
21	4.302
21	4.11
21	3.612
21	4.302
21	3.624
21	4.104
21	4.446
21	4.644
21	3.3666
21	3.924
21	4.1766
21	3.762
21	3.456
21	3.72
21	3.8862
21	4.176
21	4.059
21	4.008
21	3.642
21	3.888
21	3.9
21	3.93
21	4.56
21	3.681

## Sheet: Figure 2C
g-TuRC nucleation assay - nucleation versus time series					Data set 1														Data set 2														Data set 3
3.5uM tubulin		7uM tubulin		10.5uM tubulin		14uM tubulin		17.5uM tubulin		21uM tubulin				3.5uM tubulin		7uM tubulin		10.5uM tubulin		14uM tubulin		17.5uM tubulin		21uM tubulin				3.5uM tubulin		7uM tubulin		10.5uM tubulin		14uM tubulin		17.5uM tubulin		21uM tubulin
Time (seconds)	Number of MTs	Time (seconds)	Number of MTs	Time (seconds)	Number of MTs	Time (seconds)	Number of MTs	Time (seconds)	Number of MTs	Time (seconds)	Number of MTs			Time (seconds)	Number of MTs	Time (seconds)	Number of MTs	Time (seconds)	Number of MTs	Time (seconds)	Number of MTs	Time (seconds)	Number of MTs	Time (seconds)	Number of MTs			Time (seconds)	Number of MTs	Time (seconds)	Number of MTs	Time (seconds)	Number of MTs	Time (seconds)	Number of MTs	Time (seconds)	Number of MTs	Time (seconds)	Number of MTs
0	0	0	0	0	0	0	0	0	0	0	3			0	0	0	0	0	6	0	12	0	6	0	5			0	0	0	0	0	0	0	0	0	0	0	1
1	0	1	0	1	0	1	0	1	0	1	4			1	0	1	0	1	6	1	14	1	7	1	5			1	0	1	0	1	0	1	0	1	0	1	1
2	0	2	0	2	0	2	0	2	1	2	6			2	0	2	0	2	6	2	14	2	7	2	6			2	0	2	0	2	0	2	0	2	0	2	1
3	0	3	0	3	0	3	0	3	1	3	6			3	0	3	0	3	6	3	15	3	9	3	8			3	0	3	0	3	0	3	0	3	0	3	2
4	0	4	0	4	0	4	0	4	1	4	7			4	0	4	0	4	7	4	15	4	13	4	12			4	0	4	0	4	0	4	0	4	0	4	2
5	0	5	0	5	0	5	0	5	1	5	8			5	0	5	0	5	7	5	15	5	16	5	13			5	0	5	0	5	0	5	0	5	0	5	2
6	0	6	0	6	0	6	0	6	1	6	8			6	0	6	0	6	7	6	15	6	17	6	13			6	0	6	0	6	0	6	0	6	0	6	2
7	0	7	0	7	0	7	0	7	1	7	10			7	0	7	0	7	7	7	16	7	19	7	16			7	0	7	0	7	0	7	0	7	0	7	2
8	0	8	0	8	0	8	0	8	1	8	14			8	0	8	0	8	8	8	18	8	22	8	22			8	0	8	0	8	0	8	0	8	0	8	2
9	0	9	0	9	1	9	0	9	1	9	16			9	0	9	1	9	8	9	18	9	25	9	30			9	0	9	0	9	0	9	0	9	0	9	2
10	0	10	0	10	2	10	2	10	2	10	17			10	0	10	1	10	8	10	18	10	26	10	38			10	0	10	0	10	1	10	0	10	0	10	3
11	0	11	0	11	2	11	2	11	3	11	17			11	0	11	1	11	8	11	20	11	28	11	41			11	0	11	0	11	1	11	0	11	0	11	3
12	0	12	0	12	2	12	2	12	3	12	18			12	0	12	1	12	11	12	21	12	32	12	46			12	0	12	0	12	1	12	0	12	0	12	4
13	0	13	0	13	3	13	2	13	5	13	18			13	0	13	1	13	12	13	22	13	37	13	50			13	0	13	0	13	1	13	0	13	0	13	4
14	0	14	0	14	4	14	2	14	7	14	19			14	0	14	1	14	12	14	22	14	39	14	63			14	0	14	0	14	1	14	0	14	0	14	4
15	0	15	0	15	4	15	2	15	8	15	22			15	0	15	1	15	12	15	23	15	41	15	69			15	0	15	0	15	1	15	0	15	0	15	4
16	0	16	0	16	5	16	4	16	9	16	24			16	0	16	1	16	13	16	23	16	46	16	75			16	0	16	0	16	1	16	0	16	0	16	5
17	0	17	0	17	6	17	6	17	11	17	26			17	0	17	1	17	13	17	24	17	48	17	87			17	0	17	0	17	1	17	0	17	1	17	5
18	0	18	0	18	6	18	10	18	13	18	26			18	0	18	1	18	14	18	25	18	49	18	97			18	0	18	0	18	1	18	0	18	2	18	6
19	0	19	0	19	6	19	10	19	16	19	26			19	0	19	1	19	16	19	25	19	51	19	100			19	0	19	0	19	1	19	0	19	2	19	8
20	0	20	0	20	6	20	11	20	17	20	30			20	0	20	1	20	17	20	27	20	56	20	106			20	0	20	0	20	1	20	0	20	2	20	9
21	0	21	0	21	7	21	11	21	19	21	33			21	0	21	1	21	18	21	29	21	60	21	114			21	0	21	0	21	1	21	1	21	2	21	11
22	0	22	0	22	7	22	11	22	22	22	36			22	0	22	1	22	19	22	30	22	61	22	124			22	0	22	0	22	1	22	1	22	4	22	14
23	0	23	0	23	7	23	11	23	24	23	36			23	0	23	1	23	20	23	31	23	65	23	135			23	0	23	0	23	1	23	1	23	4	23	15
24	0	24	0	24	7	24	12	24	25	24	41			24	0	24	1	24	21	24	32	24	70	24	143			24	0	24	0	24	1	24	1	24	4	24	16
25	0	25	0	25	7	25	13	25	29	25	45			25	0	25	1	25	21	25	35	25	73	25	152			25	0	25	0	25	1	25	1	25	4	25	18
26	0	26	0	26	7	26	14	26	30	26	47			26	0	26	1	26	21	26	37	26	79	26	162			26	0	26	0	26	1	26	1	26	4	26	19
27	0	27	0	27	7	27	15	27	31	27	48			27	0	27	1	27	23	27	37	27	80	27	177			27	0	27	0	27	1	27	1	27	4	27	20
28	0	28	0	28	7	28	15	28	34	28	54			28	0	28	1	28	25	28	37	28	84	28	187			28	0	28	0	28	1	28	1	28	4	28	21
29	0	29	0	29	7	29	16	29	36	29	54			29	0	29	1	29	26	29	38	29	87	29	194			29	0	29	0	29	1	29	1	29	4	29	22
30	0	30	0	30	8	30	16	30	37	30	57			30	0	30	1	30	26	30	39	30	88	30	207			30	0	30	0	30	1	30	1	30	4	30	24
31	0	31	0	31	8	31	17	31	39	31	59			31	0	31	1	31	28	31	39	31	89	31	228			31	0	31	0	31	1	31	1	31	5	31	26
32	0	32	0	32	11	32	18	32	41	32	64			32	0	32	1	32	29	32	41	32	93	32	242			32	0	32	0	32	1	32	2	32	7	32	28
33	0	33	0	33	11	33	18	33	41	33	66			33	0	33	1	33	31	33	44	33	98	33	253			33	0	33	0	33	1	33	2	33	7	33	32
34	0	34	0	34	11	34	18	34	42	34	68			34	0	34	1	34	33	34	50	34	102	34	262			34	0	34	0	34	1	34	2	34	7	34	32
35	0	35	0	35	11	35	20	35	43	35	75			35	0	35	1	35	35	35	50	35	108	35	267			35	0	35	0	35	1	35	2	35	7	35	33
36	0	36	0	36	11	36	20	36	47	36	80			36	0	36	1	36	36	36	53	36	110	36	278			36	0	36	0	36	1	36	2	36	7	36	33
37	0	37	0	37	11	37	21	37	50	37	86			37	0	37	1	37	37	37	55	37	113	37	284			37	0	37	0	37	1	37	2	37	7	37	34
38	0	38	0	38	12	38	23	38	52	38	92			38	0	38	1	38	39	38	58	38	117	38	296			38	0	38	0	38	1	38	2	38	7	38	34
39	0	39	0	39	12	39	23	39	52	39	96			39	0	39	2	39	41	39	59	39	118	39	306			39	0	39	0	39	1	39	2	39	8	39	35
40	0	40	0	40	13	40	23	40	53	40	100			40	0	40	2	40	41	40	62	40	122	40	320			40	0	40	0	40	1	40	2	40	10	40	37
41	0	41	0	41	13	41	23	41	61	41	101			41	0	41	2	41	41	41	64	41	122	41	325			41	0	41	0	41	1	41	2	41	10	41	38
42	0	42	0	42	13	42	23	42	62	42	104			42	0	42	3	42	42	42	65	42	128	42	336			42	0	42	0	42	1	42	2	42	10	42	41
43	0	43	0	43	14	43	23	43	68	43	109			43	0	43	3	43	44	43	66	43	132	43	347			43	0	43	0	43	1	43	2	43	10	43	41
44	0	44	0	44	15	44	24	44	71	44	111			44	0	44	3	44	45	44	68	44	135	44	354			44	0	44	0	44	1	44	2	44	10	44	41
45	0	45	0	45	15	45	24	45	73	45	113			45	0	45	3	45	45	45	69	45	141	45	359			45	0	45	0	45	1	45	2	45	11	45	43
46	0	46	0	46	16	46	24	46	75	46	116			46	0	46	3	46	47	46	69	46	146	46	366			46	0	46	0	46	1	46	2	46	12	46	45
47	0	47	0	47	17	47	27	47	75	47	120			47	0	47	3	47	50	47	71	47	151	47	375			47	0	47	0	47	1	47	2	47	13	47	46
48	0	48	0	48	17	48	28	48	77	48	129			48	0	48	3	48	52	48	71	48	159	48	377			48	0	48	0	48	1	48	3	48	16	48	49
49	0	49	1	49	17	49	28	49	80	49	131			49	0	49	3	49	55	49	72	49	163	49	387			49	0	49	0	49	1	49	3	49	16	49	49
50	0	50	1	50	17	50	28	50	82	50	137			50	0	50	3	50	55	50	73	50	167	50	398			50	0	50	0	50	1	50	5	50	16	50	51
51	0	51	1	51	18	51	29	51	85	51	141			51	0	51	3	51	56	51	74	51	170	51	404			51	0	51	0	51	1	51	6	51	16	51	52
52	0	52	1	52	18	52	29	52	89	52	146			52	0	52	3	52	56	52	75	52	173	52	408			52	0	52	0	52	1	52	6	52	18	52	54
53	0	53	2	53	18	53	29	53	90	53	148			53	0	53	3	53	56	53	75	53	176	53	415			53	0	53	0	53	1	53	7	53	18	53	55
54	0	54	2	54	19	54	30	54	91	54	151			54	0	54	3	54	57	54	76	54	181	54	424			54	0	54	0	54	1	54	7	54	18	54	57
55	0	55	2	55	19	55	30	55	92	55	154			55	0	55	3	55	57	55	76	55	186	55	429			55	0	55	0	55	1	55	7	55	19	55	59
56	0	56	2	56	21	56	30	56	95	56	161			56	0	56	3	56	57	56	79	56	189	56	440			56	0	56	0	56	2	56	9	56	19	56	60
57	0	57	2	57	21	57	31	57	100	57	164			57	0	57	3	57	58	57	81	57	190	57	446			57	0	57	0	57	2	57	9	57	20	57	60
58	0	58	2	58	21	58	33	58	101	58	167			58	0	58	3	58	60	58	82	58	196	58	452			58	0	58	0	58	2	58	9	58	23	58	61
59	0	59	2	59	22	59	35	59	107	59	173			59	0	59	3	59	60	59	82	59	201	59	456			59	0	59	0	59	2	59	9	59	24	59	64
60	0	60	2	60	22	60	36	60	110	60	179			60	0	60	3	60	60	60	84	60	203	60	460			60	0	60	0	60	2	60	9	60	25	60	65
61	0	61	2	61	22	61	37	61	115	61	185			61	0	61	3	61	60	61	84	61	207	61	465			61	0	61	0	61	2	61	9	61	27	61	67
62	0	62	3	62	22	62	37	62	117	62	186			62	0	62	3	62	60	62	87	62	211	62	467			62	0	62	0	62	2	62	9	62	27	62	68
63	0	63	4	63	22	63	39	63	120	63	189			63	0	63	3	63	60	63	88	63	216	63	470			63	0	63	0	63	2	63	9	63	29	63	70
64	0	64	4	64	22	64	39	64	125	64	192			64	0	64	3	64	61	64	90	64	222	64	471			64	0	64	0	64	2	64	9	64	29	64	71
65	0	65	4	65	22	65	41	65	125	65	195			65	0	65	3	65	61	65	90	65	225	65	472			65	0	65	0	65	2	65	9	65	30	65	72
66	0	66	4	66	22	66	41	66	128	66	198			66	0	66	4	66	61	66	90	66	226	66	474			66	0	66	0	66	2	66	9	66	30	66	72
67	0	67	4	67	22	67	42	67	129	67	200			67	0	67	4	67	63	67	90	67	228	67	475			67	0	67	0	67	2	67	10	67	30	67	72
68	0	68	5	68	23	68	43	68	134	68	202			68	0	68	4	68	63	68	92	68	231	68	476			68	0	68	0	68	3	68	10	68	30	68	74
69	0	69	5	69	23	69	44	69	138	69	204			69	0	69	4	69	63	69	94	69	235	69	477			69	0	69	0	69	3	69	10	69	30	69	76
70	0	70	5	70	23	70	47	70	143	70	207			70	0	70	4	70	64	70	95	70	238	70	477			70	0	70	0	70	3	70	10	70	31	70	79
71	0	71	5	71	24	71	48	71	143	71	214			71	0	71	4	71	64	71	96	71	239	71	477			71	0	71	0	71	3	71	10	71	32	71	81
72	0	72	5	72	24	72	49	72	146	72	220			72	0	72	4	72	65	72	97	72	240	72	477			72	0	72	0	72	3	72	10	72	33	72	83
73	0	73	5	73	25	73	50	73	149	73	223			73	0	73	4	73	66	73	98	73	244	73	479			73	0	73	0	73	3	73	11	73	34	73	86
74	0	74	5	74	25	74	51	74	156	74	225			74	0	74	4	74	67	74	98	74	248	74	479			74	0	74	1	74	4	74	11	74	34	74	86
75	0	75	6	75	26	75	52	75	157	75	230			75	0	75	4	75	67	75	100	75	251					75	0	75	1	75	6	75	12	75	35	75	86
76	0	76	8	76	27	76	52	76	162	76	238			76	0	76	4	76	68	76	100	76	252					76	0	76	1	76	6	76	12	76	36	76	86
77	0	77	8	77	27	77	52	77	163	77	243			77	0	77	4	77	69	77	104	77	257					77	0	77	1	77	6	77	12	77	37	77	86
78	0	78	8	78	29	78	53	78	165	78	244			78	0	78	4	78	69	78	106	78	262					78	0	78	1	78	6	78	12	78	37	78	87
79	0	79	8	79	31	79	54	79	165	79	247			79	0	79	4	79	70	79	107	79	266					79	0	79	1	79	6	79	12	79	37	79	88
80	0	80	8	80	31	80	55	80	166	80	251			80	0	80	4	80	70	80	107	80	269					80	0	80	1	80	6	80	13	80	37	80	90
81	0	81	8	81	31	81	56	81	170	81	255			81	0	81	4	81	70	81	108	81	271					81	0	81	1	81	6	81	13	81	39	81	93
82	0	82	8	82	31	82	58	82	171	82	257			82	0	82	4	82	70	82	108	82	272					82	0	82	1	82	6	82	13	82	39	82	94
83	0	83	8	83	32	83	58	83	172	83	261			83	0	83	4	83	71	83	109	83	274					83	0	83	1	83	6	83	13	83	40	83	97
84	0	84	8	84	34	84	59	84	174	84	267			84	0	84	4	84	71	84	111	84	276					84	0	84	1	84	6	84	13	84	40	84	98
85	0	85	8	85	34	85	59	85	178	85	271			85	0	85	4	85	72	85	111	85	280					85	0	85	1	85	6	85	13	85	40	85	98
86	0	86	8	86	35	86	61	86	179	86	273			86	0	86	4	86	75	86	112	86	284					86	0	86	1	86	6	86	14	86	41	86	100
87	0	87	8	87	35	87	62	87	187	87	277			87	0	87	4	87	75	87	114	87	291					87	0	87	1	87	6	87	14	87	41	87	104
88	0	88	8	88	36	88	62	88	190	88	280			88	0	88	4	88	76	88	115	88	295					88	0	88	1	88	6	88	14	88	41	88	106
89	0	89	8	89	36	89	63	89	192	89	282			89	0	89	4	89	76	89	116	89	298					89	0	89	1	89	6	89	15	89	42	89	108
90	0	90	9	90	37	90	64	90	194	90	284			90	0	90	4	90	76	90	116	90	299					90	0	90	1	90	6	90	15	90	42	90	109
91	0	91	9	91	37	91	64	91	196	91	289			91	0	91	4	91	76	91	117	91	299					91	0	91	1	91	6	91	15	91	42	91	112
92	0	92	9	92	37	92	67	92	200	92	295			92	0	92	4	92	76	92	120	92	299					92	0	92	1	92	6	92	16	92	42	92	113
93	0	93	9	93	37	93	69	93	202	93	296			93	0	93	4	93	76	93	121	93	299					93	0	93	1	93	6	93	16	93	42	93	114
94	0	94	9	94	37	94	69	94	204	94	298			94	0	94	4	94	77	94	122	94	304					94	0	94	1	94	6	94	16	94	42	94	117
95	0	95	9	95	37	95	70	95	205	95	301			95	0	95	4	95	78	95	125	95	307					95	0	95	1	95	6	95	16	95	42	95	120
96	0	96	9	96	38	96	70	96	206	96	304			96	0	96	4	96	78	96	125	96	309					96	0	96	1	96	6	96	17	96	42	96	121
97	0	97	9	97	38	97	73	97	209	97	309			97	0	97	4	97	79	97	126	97	311					97	0	97	1	97	6	97	17	97	44	97	123
98	0	98	9	98	38	98	74	98	210	98	312			98	0	98	4	98	79	98	127	98	312					98	0	98	1	98	6	98	17	98	44	98	124
99	0	99	9	99	40	99	74	99	211	99	315			99	0	99	4	99	79	99	127	99	314					99	0	99	1	99	6	99	17	99	46	99	124
100	0	100	10	100	40	100	75	100	213	100	316			100	0	100	4	100	79	100	127	100	319					100	0	100	1	100	6	100	18	100	46	100	129
101	0	101	10	101	40	101	76	101	215	101	318			101	0	101	4	101	79	101	128	101	321					101	0	101	1	101	6	101	18	101	47	101	131
102	0	102	10	102	40	102	79	102	217	102	321			102	0	102	5	102	79	102	131	102	322					102	0	102	1	102	6	102	19	102	47	102	136
103	0	103	10	103	42	103	80	103	218	103	327			103	0	103	5	103	79	103	132	103	323					103	0	103	1	103	6	103	19	103	47	103	139
104	0	104	10	104	43	104	81	104	220	104	332			104	0	104	5	104	79	104	134	104	325					104	0	104	1	104	6	104	19	104	47	104	141
105	0	105	10	105	44	105	81	105	222	105	338			105	0	105	5	105	79	105	134	105	325					105	0	105	1	105	6	105	20	105	47	105	145
106	0	106	10	106	44	106	81	106	222	106	340			106	0	106	5	106	80	106	135	106	328					106	0	106	1	106	6	106	20	106	47	106	146
107	0	107	10	107	45	107	81	107	224	107	346			107	0	107	5	107	80	107	136	107	329					107	0	107	1	107	6	107	20	107	47	107	148
108	0	108	10	108	46	108	82	108	225	108	351			108	0	108	5	108	81	108	136	108	330					108	0	108	1	108	6	108	20	108	47	108	150
109	0	109	10	109	46	109	82	109	227	109	354			109	0	109	5	109	83	109	136	109	333					109	0	109	1	109	6	109	21	109	48	109	151
110	0	110	10	110	46	110	82	110	230	110	358			110	0	110	5	110	85	110	136	110	333					110	0	110	1	110	6	110	21	110	49	110	151
111	0	111	10	111	46	111	82	111	233	111	360			111	0	111	5	111	85	111	137	111	333					111	0	111	1	111	7	111	22	111	49	111	152
112	0	112	10	112	46	112	83	112	233	112	361			112	0	112	5	112	85	112	137	112	335					112	0	112	1	112	7	112	24	112	49	112	153
113	0	113	10	113	47	113	83	113	236	113	365			113	0	113	5	113	85	113	137	113	335					113	0	113	1	113	7	113	25	113	50	113	153
114	0	114	10	114	47	114	83	114	237	114	370			114	0	114	6	114	86	114	138	114	335					114	0	114	1	114	7	114	25	114	51	114	155
115	0	115	10	115	47	115	83	115	237	115	374			115	0	115	6	115	86	115	139	115	335					115	0	115	1	115	7	115	26	115	52	115	157
116	0	116	10	116	47	116	83	116	240	116	377			116	0	116	6	116	86	116	141	116	335					116	0	116	1	116	7	116	26	116	52	116	158
117	0	117	10	117	48	117	84	117	243	117	384			117	0	117	6	117	87	117	142	117	335					117	0	117	1	117	7	117	26	117	53	117	164
118	0	118	10	118	49	118	85	118	246	118	385			118	0	118	6	118	87	118	142	118	336					118	0	118	1	118	7	118	26	118	53	118	165
119	0	119	10	119	49	119	86	119	249	119	390			119	0	119	6	119	87	119	144	119	336					119	0	119	1	119	7	119	26	119	54	119	166
120	0	120	10	120	50	120	86	120	250	120	394			120	0	120	6	120	88	120	146	120	337					120	0	120	1	120	8	120	26	120	54	120	168
121	0	121	10	121	50	121	86	121	251	121	397			121	0	121	7	121	88	121	146	121	338					121	0	121	1	121	8	121	26	121	54	121	170
122	0	122	10	122	50	122	86	122	254	122	400			122	0	122	7	122	88	122	147	122	339					122	0	122	1	122	8	122	26	122	54	122	171
123	0	123	10	123	51	123	87	123	257	123	402			123	0	123	7	123	89	123	147	123	340					123	0	123	1	123	8	123	27	123	55	123	171
124	0	124	10	124	51	124	87	124	259	124	407			124	0	124	7	124	89	124	147	124	342					124	0	124	1	124	8	124	27	124	55	124	171
125	0	125	10	125	51	125	89	125	261	125	408			125	0	125	7	125	90	125	147	125	343					125	0	125	1	125	8	125	27	125	56	125	172
126	0	126	10	126	51	126	89	126	264	126	408			126	0	126	8	126	90	126	147	126	344					126	0	126	1	126	8	126	29	126	56	126	173
127	0	127	10	127	51	127	90	127	264	127	412			127	0	127	8	127	90	127	147	127	345					127	0	127	1	127	8	127	29	127	56	127	173
128	0	128	10	128	51	128	90	128	264	128	415			128	0	128	8	128	90	128	148	128	347					128	0	128	1	128	8	128	29	128	56	128	175
129	0	129	10	129	51	129	90	129	266	129	416			129	0	129	8	129	90	129	148	129	348					129	0	129	1	129	8	129	31	129	57	129	177
130	0	130	10	130	51	130	90	130	270	130	417			130	0	130	8	130	91	130	149	130	349					130	0	130	1	130	8	130	31	130	58	130	178
131	0	131	10	131	51	131	90	131	272	131	423			131	0	131	8	131	91	131	150	131	350					131	0	131	1	131	8	131	31	131	58	131	181
132	0	132	10	132	52	132	90	132	274	132	424			132	0	132	8	132	91	132	150	132	350					132	0	132	1	132	8	132	31	132	59	132	183
133	0	133	10	133	53	133	90	133	276	133	427			133	0	133	8	133	91	133	150	133	350					133	0	133	1	133	9	133	31	133	59	133	187
134	0	134	10	134	53	134	91	134	282	134	430			134	0	134	8	134	91	134	150	134	350					134	0	134	1	134	9	134	31	134	59	134	189
135	0	135	10	135	55	135	91	135	285	135	434			135	0	135	8	135	91	135	150	135	352					135	0	135	1	135	10	135	32	135	59	135	193
136	0	136	10	136	55	136	92	136	288	136	434			136	0	136	8	136	92	136	150	136	355					136	0	136	1	136	10	136	33	136	59	136	194
137	0	137	10	137	55	137	93	137	289	137	437			137	0	137	8	137	92	137	151	137	357					137	0	137	1	137	10	137	33	137	59	137	195
138	0	138	10	138	55	138	94	138	292	138	438			138	0	138	8	138	92	138	152	138	358					138	0	138	1	138	10	138	33	138	59	138	197
139	0	139	10	139	55	139	95	139	296	139	438			139	0	139	8	139	92	139	152	139	358					139	0	139	1	139	10	139	33	139	61	139	199
140	0	140	10	140	56	140	95	140	296	140	438			140	0	140	8	140	92	140	152	140	358					140	0	140	1	140	10	140	33	140	62	140	199
141	0	141	10	141	57	141	95	141	296	141	439			141	0	141	8	141	92	141	152	141	358					141	0	141	1	141	11	141	33	141	63	141	201
142	0	142	11	142	57	142	96	142	298	142	441			142	0	142	8	142	92	142	152	142	359					142	0	142	1	142	11	142	33	142	63	142	201
143	0	143	11	143	57	143	97	143	302	143	444			143	0	143	8	143	92	143	153	143	360					143	0	143	1	143	11	143	33	143	63	143	202
144	0	144	11	144	57	144	97	144	302	144	446			144	0	144	8	144	92	144	155	144	360					144	0	144	1	144	11	144	33	144	63	144	203
145	0	145	11	145	57	145	98	145	304	145	449			145	0	145	8	145	92	145	155	145	360					145	0	145	1	145	11	145	33	145	64	145	204
146	0	146	11	146	58	146	99	146	305	146	449			146	0	146	8	146	92	146	155	146	360					146	0	146	1	146	11	146	33	146	64	146	207
147	0	147	11	147	58	147	99	147	306	147	450			147	0	147	8	147	92	147	155	147	361					147	0	147	1	147	11	147	33	147	64	147	209
148	0	148	11	148	59	148	101	148	307	148	452			148	0	148	8	148	92	148	158	148	361					148	0	148	1	148	12	148	33	148	64	148	210
149	0	149	11	149	59	149	102	149	308	149	453			149	0	149	8	149	92	149	158	149	362					149	0	149	1	149	12	149	33	149	65	149	211
150	0	150	11	150	59	150	103	150	312	150	455			150	0	150	8	150	92	150	158	150	363					150	0	150	1	150	12	150	33	150	65	150	213
151	0	151	11	151	59	151	103	151	313	151	455			151	0	151	8	151	92	151	159	151	364					151	0	151	1	151	12	151	33	151	65	151	214
152	0	152	11	152	59	152	104	152	313	152	456			152	0	152	8	152	92	152	159	152	364					152	0	152	1	152	12	152	34	152	65	152	215
153	0	153	11	153	59	153	104	153	314	153	456			153	0	153	8	153	92	153	159	153	364					153	0	153	1	153	12	153	34	153	65	153	216
154	0	154	11	154	59	154	104	154	317	154	457			154	0	154	8	154	92	154	159	154	364					154	0	154	1	154	12	154	35	154	65	154	218
155	0	155	11	155	59	155	104	155	320	155	458			155	0	155	8	155	92	155	159	155	364					155	0	155	1	155	12	155	35	155	66	155	221
156	0	156	11	156	60	156	105	156	321	156	459			156	0	156	8	156	92	156	159	156	366					156	0	156	1	156	12	156	35	156	67	156	222
157	0	157	11	157	61	157	105	157	322	157	459			157	0	157	8	157	92	157	159	157	366					157	0	157	1	157	12	157	35	157	68	157	224
158	0	158	11	158	62	158	105	158	325	158	461			158	0	158	8	158	92	158	159	158	366					158	0	158	1	158	12	158	35	158	68	158	224
159	0	159	11	159	63	159	106	159	328	159	461			159	0	159	8	159	92	159	159	159	366					159	0	159	1	159	12	159	35	159	69	159	224
160	0	160	11	160	63	160	107	160	330	160	462			160	0	160	8	160	92	160	159	160	366					160	0	160	1	160	12	160	35	160	69	160	225
161	0	161	11	161	63	161	107	161	333	161	462			161	0	161	8	161	92	161	159	161	366					161	0	161	1	161	12	161	35	161	69	161	225
162	0	162	11	162	63	162	107	162	334	162	463			162	0	162	9	162	92	162	159	162	366					162	0	162	1	162	12	162	35	162	71	162	227
163	0	163	11	163	63	163	107	163	334	163	463			163	0	163	9	163	92	163	159	163	366					163	0	163	1	163	12	163	35	163	71	163	228
164	0	164	11	164	63	164	109	164	336	164	463			164	0	164	9	164	92	164	159	164	366					164	0	164	1	164	12	164	35	164	72	164	228
165	0	165	11	165	63	165	109	165	338	165	463			165	0	165	9	165	92	165	159	165	367					165	0	165	1	165	12	165	36	165	72	165	229
166	0	166	11	166	64	166	109	166	341	166	463			166	0	166	9	166	92	166	159	166	367					166	0	166	1	166	13	166	36	166	72	166	230
167	0	167	11	167	64	167	109	167	344	167	464			167	0	167	9	167	92	167	159							167	0	167	1	167	13	167	37	167	72	167	232
168	0	168	12	168	64	168	109	168	348					168	0	168	9	168	92	168	159							168	0	168	1	168	13	168	37	168	73	168	233
169	0	169	12	169	64	169	109	169	350					169	0	169	9	169	92	169	160							169	0	169	1	169	13	169	37	169	73	169	234
170	0	170	12	170	65	170	109	170	350					170	0	170	9	170	92	170	160							170	0	170	1	170	14	170	37	170	73	170	234
171	0	171	12	171	65	171	110	171	352					171	0	171	9	171	92	171	160							171	0	171	1	171	14	171	37	171	73	171	235
172	0	172	12	172	66	172	112	172	352					172	0	172	9	172	93	172	160							172	0	172	1	172	14	172	37	172	73	172	236
173	0	173	12	173	66	173	112	173	354					173	0	173	9	173	93	173	160							173	0	173	1	173	15	173	37	173	74	173	236
174	0	174	12	174	66	174	113	174	356					174	0	174	9	174	93	174	160							174	0	174	1	174	15	174	37	174	74	174	237
175	0	175	12	175	66	175	114	175	358					175	0	175	9	175	93	175	160							175	0	175	1	175	15	175	37	175	74	175	237
176	0	176	12	176	67	176	114	176	358					176	0	176	9	176	93	176	160							176	0	176	1	176	15	176	37	176	74	176	238
177	0	177	12	177	67	177	115	177	359					177	0	177	9	177	93	177	160							177	0	177	1	177	15	177	37	177	74	177	238
178	0	178	12	178	68	178	116	178	360					178	0	178	9	178	93	178	160							178	0	178	1	178	15	178	37	178	74	178	238
179	0	179	13	179	68	179	116	179	361					179	0	179	9	179	93	179	160							179	0	179	1	179	15	179	38	179	76	179	238
180	0	180	13	180	69	180	116	180	363					180	0	180	9	180	93	180	160							180	0	180	1	180	15	180	38	180	76	180	239
181	0	181	13	181	70	181	117	181	364					181	0	181	9	181	94	181	160							181	0	181	1	181	15	181	38	181	77	181	239
182	0	182	13	182	71	182	117	182	365					182	0	182	9	182	94	182	160							182	0	182	1	182	15	182	40	182	77	182	242
183	0	183	13	183	71	183	117	183	367					183	0	183	9	183	94	183	161							183	0	183	1	183	15	183	40	183	78	183	242
184	0	184	13	184	71	184	117	184	368					184	0	184	9	184	94	184	161							184	0	184	1	184	15	184	40	184	78	184	243
185	0	185	13	185	71	185	117	185	372					185	0	185	9	185	94	185	161							185	0	185	1	185	15	185	40	185	78	185	244
186	0	186	13	186	71	186	119	186	374					186	0	186	9	186	94	186	162							186	0	186	1	186	15	186	40	186	78	186	245
187	0	187	13	187	71	187	121	187	378					187	0	187	9	187	94	187	162							187	0	187	1	187	15	187	40	187	80	187	245
188	0	188	13	188	71	188	122	188	379					188	0	188	9	188	94									188	0	188	1	188	15	188	40	188	80	188	245
189	0	189	13	189	71	189	123	189	381					189	0	189	9	189	95									189	0	189	1	189	16	189	40	189	80	189	247
190	0	190	14	190	72	190	124	190	381					190	0	190	9	190	95									190	0	190	1	190	16	190	40	190	80	190	247
191	0	191	14	191	73	191	124	191	382					191	0	191	9	191	96									191	0	191	1	191	16	191	41	191	80	191	248
192	0	192	15	192	73	192	124	192	383					192	0	192	9	192	96									192	0	192	1	192	16	192	41	192	80	192	248
193	0	193	15	193	73	193	124	193	384					193	0	193	9	193	96									193	0	193	1	193	17	193	41	193	80	193	248
194	0	194	15	194	73	194	125	194	385					194	0	194	9	194	96									194	0	194	1	194	17	194	41	194	80	194	249
195	0	195	15	195	74	195	125	195	388					195	0	195	9	195	96									195	0	195	1	195	17	195	41	195	80	195	252
196	0	196	16	196	74	196	128	196	390					196	0	196	9	196	96									196	0	196	1	196	17	196	41	196	82	196	253
197	0	197	16	197	74	197	129	197	390					197	0	197	9	197	96									197	0	197	1	197	17	197	41	197	82	197	253
198	0	198	16	198	74	198	129	198	391					198	0	198	9	198	97									198	0	198	1	198	17	198	41	198	82	198	254
199	0	199	16	199	74	199	130	199	391					199	0	199	9	199	97									199	0	199	1	199	17	199	41	199	84	199	255
200	0	200	16	200	74	200	131	200	391					200	0	200	9											200	0	200	1	200	17	200	41	200	84	200	255
201	0	201	16	201	74	201	131	201	391					201	0	201	9											201	0	201	1	201	17	201	42	201	84	201	255
202	0	202	16	202	74	202	133	202	392					202	0	202	9											202	0	202	1	202	17	202	42	202	84	202	255
203	0	203	16	203	75	203	133	203	393					203	0	203	9											203	0	203	1	203	17	203	42	203	84	203	255
204	0	204	16	204	76	204	134	204	395					204	0	204	10											204	0	204	1	204	17	204	42	204	85	204	256
205	0	205	16	205	76	205	134	205	397					205	0	205	10											205	0	205	1	205	17	205	42	205	85	205	256
206	0	206	16	206	76	206	136	206	399					206	0	206	10											206	0	206	1	206	17	206	42	206	85	206	257
207	0	207	16	207	76	207	136	207	399					207	0	207	10											207	0	207	1	207	17	207	43	207	85	207	257
208	0	208	16	208	77	208	137	208	401					208	0	208	10											208	0	208	1	208	17	208	44	208	85	208	258
209	0	209	17	209	77	209	138	209	403					209	0	209	10											209	0	209	1	209	17	209	44	209	86	209	260
210	0	210	17	210	77	210	138	210	403					210	0	210	10											210	0	210	1	210	17	210	45	210	86	210	260
211	0	211	17	211	77	211	138	211	404					211	0	211	10											211	0	211	1	211	17	211	46	211	86	211	260
212	0	212	17	212	78	212	139	212	404					212	0	212	10											212	0	212	1	212	17	212	46	212	86	212	260
213	0	213	17	213	78	213	139	213	405					213	0	213	10											213	0	213	1	213	17	213	46	213	86	213	261
214	0	214	17	214	78	214	139	214	405					214	0	214	10											214	0	214	1	214	17	214	46	214	87	214	261
215	0	215	17	215	78	215	140	215	407					215	0	215	10											215	0	215	1	215	17	215	46	215	88	215	261
216	0	216	17	216	78	216	142	216	408					216	0	216	10											216	0	216	1	216	17	216	47	216	88	216	262
217	0	217	18	217	78	217	142	217	408					217	0	217	10											217	0	217	1	217	17	217	48	217	88	217	262
218	0	218	18	218	78	218	143	218	409					218	0	218	10											218	0	218	1	218	17	218	48	218	88	218	263
219	0	219	18	219	78	219	143	219	410					219	0	219	10											219	0	219	1	219	17	219	48	219	89	219	263
220	0	220	19	220	78	220	143	220	411					220	0	220	10											220	0	220	1	220	17	220	48	220	90	220	263
221	0	221	19	221	78	221	143	221	411					221	0	221	10											221	0	221	1	221	17	221	48	221	90	221	264
222	0	222	19	222	78	222	143	222	413					222	0	222	10											222	0	222	1	222	17	222	49	222	90	222	264
223	0	223	19	223	78	223	143	223	413					223	0	223	10											223	0	223	1	223	17	223	49	223	90	223	264
224	0	224	19	224	78	224	143	224	413					224	0	224	10											224	0	224	1	224	17	224	49	224	90	224	264
225	0	225	19	225	78	225	143	225	413					225	0	225	10											225	0	225	1	225	17	225	49	225	90	225	264
226	0	226	19	226	78	226	143	226	413					226	0	226	10											226	0	226	1	226	18	226	50	226	91	226	264
227	0	227	19	227	78	227	143	227	413					227	0	227	10											227	0	227	1	227	18	227	50	227	93	227	265
228	0	228	19	228	79	228	144	228	414					228	0	228	10											228	0	228	1	228	18	228	50	228	93	228	265
229	0	229	19	229	80	229	145	229	415					229	0	229	10											229	0	229	1	229	18	229	50	229	95	229	266
230	0	230	19	230	82	230	145	230	415					230	0	230	11											230	0	230	2	230	18	230	50	230	97	230	266
231	0	231	19	231	83	231	145																					231	0	231	2	231	18	231	50	231	98	231	266
232	0	232	19	232	84	232	145																					232	0	232	2	232	18	232	52	232	98	232	266
233	0	233	19	233	84	233	147																					233	0	233	2	233	18	233	52	233	100	233	267
234	0	234	19	234	84	234	148																					234	0	234	2	234	18	234	52	234	100	234	267
235	0	235	19	235	84	235	148																					235	0	235	2	235	18	235	52	235	100	235	267
236	0	236	19	236	84	236	149																					236	0	236	2	236	18	236	53	236	100	236	267
237	0	237	19	237	84	237	150																					237	0	237	2	237	18	237	53	237	101	237	268
238	0	238	19	238	85	238	150																					238	0	238	2	238	18	238	53	238	101	238	268
239	0	239	19	239	87	239	151																					239	0	239	2	239	18	239	53	239	103
240	0	240	20	240	87	240	151																					240	0	240	2	240	19	240	53	240	103
241	0	241	20	241	87	241	152																					241	0	241	2	241	19	241	54	241	105
242	0	242	20	242	88	242	152																					242	0	242	2	242	19	242	54	242	105
243	0	243	20	243	88	243	152																					243	0	243	2	243	19	243	54	243	107
244	0	244	20	244	88	244	152																					244	0	244	2	244	19	244	54	244	107
245	0	245	20	245	88	245	152																					245	0	245	2	245	19	245	54	245	108
246	0	246	20	246	88	246	152																					246	0	246	2	246	19	246	55	246	109
247	0	247	20	247	89	247	152																					247	0	247	2	247	19	247	55	247	109
248	0	248	20	248	89	248	152																					248	0	248	2	248	19	248	55	248	110
249	0	249	21	249	89	249	153																					249	0	249	2	249	19	249	55	249	110
250	0	250	21	250	89	250	153																					250	0	250	2	250	19	250	55	250	110
251	0	251	21	251	89	251	153																					251	0	251	2	251	19	251	56	251	110
252	0	252	21	252	89	252	153																					252	0	252	2	252	19	252	56	252	110
253	0	253	21	253	89	253	153																					253	0	253	2	253	19	253	56	253	110
254	0	254	21	254	89	254	153																					254	0	254	2	254	19	254	57	254	111
255	0	255	21	255	91	255	153																					255	0	255	2	255	19	255	57	255	112
256	0	256	21	256	92	256	153																					256	0	256	2	256	20	256	58	256	112
257	0	257	21	257	92	257	153																					257	0	257	2	257	20	257	58	257	113
258	0	258	21	258	92	258	153																					258	0	258	2	258	20	258	58	258	113
259	0	259	21	259	92	259	154																					259	0	259	2	259	21	259	58	259	113
260	0	260	21	260	93	260	155																					260	0	260	2	260	21	260	58	260	114
261	0	261	21	261	94	261	156																					261	0	261	2	261	22	261	58	261	114
262	0	262	21	262	95	262	156																					262	0	262	2	262	22	262	58	262	114
263	0	263	21	263	95	263	156																					263	0	263	2	263	22	263	58	263	114
264	0	264	21	264	95	264	158																					264	0	264	3	264	22	264	59	264	115
265	0	265	21	265	95	265	159																					265	0	265	3	265	22	265	59	265	115
266	0	266	21	266	95	266	159																					266	0	266	3	266	24	266	59	266	116
267	0	267	21	267	95	267	161																					267	0	267	3	267	24	267	59	267	116
268	0	268	22	268	95	268	161																					268	0	268	3	268	25	268	60	268	116
269	0	269	22	269	95	269	162																					269	0	269	3	269	25	269	60	269	116
270	0	270	22	270	96	270	162																					270	0	270	3	270	25	270	60	270	116
271	0	271	22	271	96	271	162																					271	0	271	3	271	25	271	60	271	116
272	0	272	22	272	96	272	162																					272	0	272	3	272	25	272	60	272	117
273	0	273	22	273	96	273	162																					273	0	273	3	273	25	273	60	273	118
274	0	274	22	274	96	274	162																					274	0	274	3	274	25	274	60	274	120
275	0	275	22	275	96	275	162																					275	0	275	3	275	26	275	60	275	121
276	0	276	22	276	97	276	163																					276	0	276	3	276	27	276	60	276	122
277	0	277	22	277	97	277	163																					277	0	277	3	277	27	277	60	277	122
278	0	278	22	278	97	278	163																					278	0	278	4	278	28	278	60	278	122
279	0	279	22	279	97	279	164																					279	0	279	4	279	28	279	60	279	122
280	0	280	22	280	98	280	164																					280	0	280	4	280	28	280	60	280	122
281	0	281	22	281	98	281	164																					281	0	281	4	281	28	281	60	281	123
282	0	282	22	282	99	282	164																					282	0	282	4	282	28	282	60	282	123
283	0	283	22	283	99	283	164																					283	0	283	4	283	28	283	60	283	123
284	0	284	22	284	100	284	166																					284	0	284	4	284	28	284	60	284	123
285	0	285	22	285	100	285	167																					285	0	285	4	285	28	285	60	285	124
286	0	286	22	286	100	286	167																					286	0	286	4	286	28	286	61	286	124
287	0	287	22	287	101	287	167																					287	0	287	4	287	28	287	62	287	124
288	0	288	22	288	102	288	167																					288	0	288	4	288	28	288	63	288	124
289	0	289	22	289	102	289	167																					289	0	289	4	289	28	289	64	289	124
290	0	290	22	290	102	290	167																					290	0	290	4	290	28	290	65	290	124
291	0	291	22	291	102	291	170																					291	0	291	4	291	28	291	65	291	124
292	0	292	22	292	102	292	170																					292	0	292	4	292	28	292	65	292	124
293	0	293	22	293	103	293	170																					293	0	293	4	293	28	293	65	293	124
294	0	294	22	294	103	294	170																					294	0	294	5	294	28	294	65	294	124
295	0	295	22	295	104	295	170																					295	0	295	5	295	28	295	65	295	125
296	0	296	22	296	106	296	170																					296	0	296	5	296	28	296	65	296	126
297	0	297	22	297	106	297	171																					297	0	297	5	297	28	297	65	297	126
298	0	298	22	298	106	298	173																					298	0	298	5	298	28	298	65	298	126
299	0	299	22	299	106	299	173																					299	0	299	5	299	28	299	65	299	126
300	0	300	22	300	106	300	173																					300	0	300	5	300	28	300	65	300	126
301	0	301	22	301	107	301	173																					301	0	301	5	301	28	301	65	301	126
302	0	302	22	302	108	302	173																					302	0	302	5	302	28	302	65	302	126
303	0	303	22	303	108	303	174																					303	0	303	5	303	28	303	65	303	126
304	0	304	22	304	108	304	174																					304	0	304	5	304	28	304	65	304	127
305	0	305	22	305	108	305	174																					305	0	305	5	305	28	305	65	305	128
306	0	306	22	306	110	306	174																					306	0	306	5	306	28	306	65	306	128
307	0	307	22	307	111	307	175																					307	0	307	5	307	28	307	66	307	128
308	0	308	22	308	111	308	175																					308	0	308	5	308	30	308	66	308	128
309	0	309	22	309	113	309	175																					309	0	309	5	309	30	309	66	309	128
310	0	310	22	310	113	310	175																					310	0	310	5	310	31	310	66	310	128
311	0	311	22	311	113	311	175																					311	0	311	5	311	31	311	66	311	128
312	0	312	22	312	113	312	176																					312	0	312	5	312	32	312	66	312	129
313	0	313	22	313	113	313	176																					313	0	313	5	313	32	313	66	313	129
314	0	314	22	314	114	314	176																					314	0	314	5	314	33	314	66	314	130
315	0	315	22	315	114	315	176																					315	0	315	5	315	33	315	66	315	130
316	0	316	23	316	115	316	177																					316	0	316	5	316	33	316	66	316	130
317	0	317	23	317	115	317	177																					317	0	317	5	317	33	317	67	317	132
318	0	318	23	318	115	318	178																					318	0	318	5	318	33	318	67	318	133
319	0	319	23	319	115	319	178																					319	0	319	5	319	33	319	67	319	134
320	0	320	23	320	115	320	178																					320	0	320	5	320	33	320	67	320	135
321	0	321	23	321	115	321	179																					321	0	321	5	321	33	321	67	321	135
322	0	322	23	322	115	322	179																					322	0	322	5	322	33	322	67	322	135
323	0	323	24	323	115	323	180																					323	0	323	5	323	33	323	67	323	135
				324	115	324	180																					324	0	324	5	324	33	324	67	324	135
				325	116	325	180																					325	0	325	5	325	33	325	67	325	135
				326	116	326	180																					326	0	326	5	326	33	326	68	326	135
				327	116	327	180																					327	0	327	5	327	33	327	68	327	135
				328	116	328	180																					328	0	328	5	328	33			328	135
				329	116	329	180																					329	0	329	5	329	33			329	136
				330	116	330	181																					330	0	330	5	330	33			330	136
				331	116	331	181																					331	0	331	5	331	33			331	136
				332	117	332	181																					332	0	332	5	332	33			332	136
				333	117	333	181																					333	0	333	5	333	33			333	136
				334	117	334	181																					334	0	334	5	334	33			334	136
				335	118	335	181																					335	0	335	5	335	33			335	137
				336	118	336	182																					336	0	336	5	336	34			336	137
				337	118	337	183																					337	0	337	5	337	34			337	137
				338	118	338	183																					338	0	338	5	338	34			338	137
				339	118																							339	0	339	5	339	34			339	138
				340	118																							340	0	340	5	340	34			340	138
				341	118																							341	0	341	5	341	34			341	138
				342	118																							342	0	342	5	342	34			342	139
				343	118																							343	0	343	5	343	35			343	141
				344	118																							344	0	344	5	344	35			344	141
				345	118																							345	0	345	5	345	35			345	141
				346	119																							346	0	346	5	346	35			346	141
				347	119																							347	0	347	5	347	35			347	141
				348	119																							348	0	348	5	348	35			348	141
				349	119																							349	0	349	5	349	35			349	141
				350	119																							350	0	350	5	350	35			350	142
				351	119																							351	0	351	5	351	35			351	142
				352	119																							352	0	352	5	352	35			352	142
				353	120																							353	0	353	5	353	35			353	142
																												354	0	354	5	354	35			354	142
																												355	0	355	5	355	35			355	142
																												356	0	356	5	356	35			356	142
																												357	0	357	5	357	35			357	143
																												358	0	358	5	358	35			358	143
																												359	0	359	5	359	35			359	144
																												360	0	360	5	360	35			360	144
																												361	0	361	5	361	35			361	144
																												362	0	362	5	362	35			362	144
																												363	0	363	5	363	35			363	144
																												364	0	364	5	364	35			364	144
																												365	0	365	5	365	35			365	145
																												366	0	366	5	366	35			366	145
																												367	0	367	5	367	36
																												368	0	368	5	368	36
																												369	0	369	5	369	37
																												370	0	370	5	370	37
																												371	0	371	5	371	37
																												372	0	372	5	372	39
																												373	0	373	5	373	39
																												374	0	374	5
																												375	0	375	5
																												376	0	376	5
																												377	0	377	5
																												378	0	378	5
																												379	0	379	5
																												380	0	380	5
																												381	0	381	5
																												382	0	382	5
																												383	0	383	5
																												384	0	384	5
																												385	0	385	5
																												386	0	386	5
																												387	0	387	5
																												388	0	388	5
																												389	0	389	5
																												390	0	390	5
																												391	0	391	5
																												392	0	392	5
																												393	0	393	5
																												394	0	394	5
																												395	0	395	5
																												396	0	396	5
																												397	0	397	5
																												398	0	398	5
																												399	0	399	5
																												400	0	400	5
																												401	0	401	5
																												402	0	402	5
																												403	0	403	5
																												404	0	404	5
																												405	0	405	5
																												406	0	406	5
																												407	0	407	5
																												408	0	408	5
																												409	0	409	5
																												410	0	410	5
																												411	0	411	5
																												412	0	412	5
																												413	0	413	5
																												414	0	414	5
																												415	0	415	5
																												416	0	416	5
																												417	0	417	5
																												418	0	418	5
																												419	0	419	5
																												420	0	420	5
																												421	0	421	5
																												422	0	422	5
																												423	0	423	5
																												424	0	424	5
																												425	0	425	5
																												426	0	426	5
																												427	0	427	5
																												428	0	428	5
																												429	0	429	5
																												430	0	430	5
																												431	0	431	6
																												432	0	432	6
																												433	0	433	6
																												434	0	434	6
																												435	0	435	6
																												436	0	436	6
																												437	0	437	6
																												438	0	438	6
																												439	0	439	6
																												440	0	440	6
																												441	0	441	6
																												442	0	442	6
																												443	0	443	6
																												444	0	444	6
																												445	0	445	7
																												446	0	446	7

## Sheet: Figure 2D
g-TuRC nucleation assay - power law analysis (normalized data)
Data set 1
Tubulin concentration (uM)	Normalized rate of nucleation
7	0.1066
10.5	0.5208
14	1
17.5	3.0876
21	4.8991
Data set 2
Tubulin concentration (uM)	Normalized rate of nucleation
7	0.0385
10.5	0.6741
14	1
17.5	2.7823
21	7.6021
Data set 3
Tubulin concentration (uM)	Normalized rate of nucleation
7	0.0524
10.5	0.3648
14	1
17.5	2.2623
21	4.4609
