# Supplementary material for: The transition state and regulation of γ-TuRC-mediated microtubule nucleation revealed by single molecule microscopy
Source: eLife. 2020 Jun 15;9:e54253. doi: 10.7554/eLife.54253 (PMC7338055; doi:10.7554/eLife.54253)
Supplement: Figure 3—source data 1. — Each excel sheet is labelled with individual figure panel. For Figure 3D, all three experimental replicates are supplied, and dataset one is plotted. [file elife-54253-fig3-data1.xlsx]

## Sheet: Figure 3B
Spontaneous nucleation assay - power law analysis (normalized data)
Data set 1
Tubulin concentration (uM)	Number of MTs nucleated in 7.5 minutes
7	0
10.5	1
14	18
17.5	77
21	236
Data set 2
Tubulin concentration (uM)	Number of MTs nucleated in 7.5 minutes
7	0
10.5	1
14	21
17.5	90
21	233
Data set 3
Tubulin concentration (uM)	Number of MTs nucleated in 7.5 minutes
7	0
10.5	1
14	16
17.5	111

## Sheet: Figure 3D
Blunt seed mediated nucleation assay - nucleation versus time series					Data set 1												Data set 2										Data set 3
1.4uM tubulin		2.45uM tubulin		3.5uM tubulin		5.25uM tubulin		7uM tubulin		8.75uM tubulin				1.4uM tubulin		2.45uM tubulin		3.5uM tubulin		7uM tubulin				1.4uM tubulin		2.45uM tubulin		3.5uM tubulin		7uM tubulin
Time (seconds)	Probability of nucleation	Time (seconds)	Probability of nucleation	Time (seconds)	Probability of nucleation	Time (seconds)	Probability of nucleation	Time (seconds)	Probability of nucleation	Time (seconds)	Probability of nucleation			Time (seconds)	Probability of nucleation	Time (seconds)	Probability of nucleation	Time (seconds)	Probability of nucleation	Time (seconds)	Probability of nucleation			Time (seconds)	Probability of nucleation	Time (seconds)	Probability of nucleation	Time (seconds)	Probability of nucleation	Time (seconds)	Probability of nucleation
0	0	0	0.021978	0	0.00390625	0	0.00561798	0	0.0170455	0	0.0185185			0	0	0	0.03125	0	0.0113636	0	0.0508475			0	0	0	0	0	0.0183486	0	0.0444444
1	0	1	0.021978	1	0.00390625	1	0.00561798	1	0.0170455	1	0.0185185			1	0	1	0.03125	1	0.0113636	1	0.059322			1	0	1	0	1	0.0275229	1	0.0444444
2	0	2	0.021978	2	0.0078125	2	0.00561798	2	0.0227273	2	0.0277778			2	0	2	0.03125	2	0.0113636	2	0.059322			2	0	2	0	2	0.0366972	2	0.05
3	0	3	0.032967	3	0.0078125	3	0.00561798	3	0.0227273	3	0.0277778			3	0	3	0.03125	3	0.0113636	3	0.0677966			3	0	3	0	3	0.0458716	3	0.0611111
4	0	4	0.032967	4	0.0078125	4	0.00561798	4	0.0284091	4	0.037037			4	0	4	0.03125	4	0.0113636	4	0.0677966			4	0	4	0	4	0.0458716	4	0.0944444
5	0	5	0.032967	5	0.0117188	5	0.00561798	5	0.0511364	5	0.0555556			5	0	5	0.03125	5	0.0113636	5	0.101695			5	0	5	0	5	0.0458716	5	0.122222
6	0	6	0.032967	6	0.0195312	6	0.011236	6	0.0511364	6	0.0833333			6	0	6	0.03125	6	0.0227273	6	0.127119			6	0	6	0	6	0.0458716	6	0.133333
7	0	7	0.032967	7	0.0195312	7	0.011236	7	0.0625	7	0.12963			7	0	7	0.03125	7	0.0227273	7	0.161017			7	0	7	0	7	0.0458716	7	0.166667
8	0	8	0.032967	8	0.0195312	8	0.011236	8	0.0852273	8	0.166667			8	0	8	0.03125	8	0.0227273	8	0.245763			8	0	8	0	8	0.0458716	8	0.2
9	0	9	0.032967	9	0.0273438	9	0.011236	9	0.0909091	9	0.203704			9	0	9	0.03125	9	0.0227273	9	0.245763			9	0	9	0	9	0.0458716	9	0.227778
10	0	10	0.043956	10	0.0273438	10	0.011236	10	0.130682	10	0.231481			10	0	10	0.03125	10	0.0227273	10	0.29661			10	0	10	0	10	0.0550459	10	0.238889
11	0	11	0.0659341	11	0.03125	11	0.011236	11	0.142045	11	0.259259			11	0	11	0.03125	11	0.0227273	11	0.330508			11	0	11	0	11	0.0550459	11	0.261111
12	0	12	0.0769231	12	0.0429688	12	0.011236	12	0.164773	12	0.277778			12	0	12	0.03125	12	0.0227273	12	0.381356			12	0	12	0	12	0.0550459	12	0.3
13	0	13	0.0879121	13	0.0429688	13	0.0168539	13	0.193182	13	0.314815			13	0	13	0.03125	13	0.0340909	13	0.415254			13	0	13	0	13	0.0550459	13	0.327778
14	0	14	0.0989011	14	0.0429688	14	0.0280899	14	0.227273	14	0.351852			14	0	14	0.0416667	14	0.0454545	14	0.432203			14	0	14	0	14	0.0550459	14	0.383333
15	0	15	0.0989011	15	0.046875	15	0.0280899	15	0.25	15	0.37963			15	0	15	0.0416667	15	0.0454545	15	0.474576			15	0	15	0	15	0.0550459	15	0.405556
16	0	16	0.0989011	16	0.046875	16	0.0449438	16	0.284091	16	0.416667			16	0	16	0.0416667	16	0.0568182	16	0.533898			16	0	16	0	16	0.0733945	16	0.444444
17	0	17	0.0989011	17	0.046875	17	0.0505618	17	0.3125	17	0.444444			17	0	17	0.0416667	17	0.0909091	17	0.559322			17	0	17	0	17	0.0733945	17	0.466667
18	0	18	0.0989011	18	0.046875	18	0.0561798	18	0.329545	18	0.481481			18	0	18	0.0416667	18	0.102273	18	0.601695			18	0	18	0	18	0.0733945	18	0.488889
19	0	19	0.0989011	19	0.0546875	19	0.0617978	19	0.386364	19	0.546296			19	0	19	0.0416667	19	0.102273	19	0.652542			19	0	19	0	19	0.0917431	19	0.555556
20	0	20	0.0989011	20	0.0546875	20	0.0898876	20	0.403409	20	0.583333			20	0	20	0.0520833	20	0.125	20	0.669492			20	0	20	0.00609756	20	0.0917431	20	0.572222
21	0	21	0.0989011	21	0.0664062	21	0.101124	21	0.4375	21	0.611111			21	0	21	0.0520833	21	0.147727	21	0.70339			21	0	21	0.00609756	21	0.100917	21	0.605556
22	0	22	0.0989011	22	0.078125	22	0.123596	22	0.488636	22	0.62037			22	0	22	0.0520833	22	0.147727	22	0.745763			22	0	22	0.00609756	22	0.100917	22	0.644444
23	0	23	0.0989011	23	0.078125	23	0.174157	23	0.505682	23	0.657407			23	0	23	0.0520833	23	0.147727	23	0.771186			23	0	23	0.00609756	23	0.110092	23	0.672222
24	0	24	0.0989011	24	0.078125	24	0.179775	24	0.545455	24	0.712963			24	0	24	0.0625	24	0.159091	24	0.813559			24	0	24	0.00609756	24	0.110092	24	0.694444
25	0	25	0.0989011	25	0.078125	25	0.191011	25	0.619318	25	0.722222			25	0	25	0.0625	25	0.193182	25	0.813559			25	0	25	0.00609756	25	0.119266	25	0.7
26	0	26	0.0989011	26	0.0859375	26	0.196629	26	0.642045	26	0.731481			26	0	26	0.0625	26	0.204545	26	0.813559			26	0	26	0.00609756	26	0.12844	26	0.755556
27	0	27	0.10989	27	0.101562	27	0.224719	27	0.676136	27	0.75			27	0	27	0.0625	27	0.215909	27	0.838983			27	0	27	0.00609756	27	0.137615	27	0.783333
28	0	28	0.120879	28	0.105469	28	0.230337	28	0.744318	28	0.759259			28	0	28	0.0625	28	0.238636	28	0.847458			28	0	28	0.00609756	28	0.165138	28	0.811111
29	0	29	0.120879	29	0.105469	29	0.258427	29	0.75	29	0.777778			29	0	29	0.0625	29	0.238636	29	0.864407			29	0	29	0.00609756	29	0.165138	29	0.822222
30	0	30	0.120879	30	0.132812	30	0.264045	30	0.761364	30	0.796296			30	0	30	0.0625	30	0.272727	30	0.881356			30	0	30	0.00609756	30	0.183486	30	0.844444
31	0	31	0.120879	31	0.132812	31	0.325843	31	0.801136	31	0.796296			31	0	31	0.0625	31	0.284091	31	0.898305			31	0	31	0.0121951	31	0.183486	31	0.855556
32	0	32	0.131868	32	0.136719	32	0.38764	32	0.823864	32	0.805556			32	0	32	0.0625	32	0.295455	32	0.898305			32	0	32	0.0121951	32	0.192661	32	0.866667
33	0	33	0.131868	33	0.15625	33	0.38764	33	0.846591	33	0.842593			33	0	33	0.0625	33	0.318182	33	0.915254			33	0	33	0.0121951	33	0.192661	33	0.877778
34	0	34	0.131868	34	0.167969	34	0.38764	34	0.863636	34	0.861111			34	0	34	0.0729167	34	0.340909	34	0.923729			34	0	34	0.0121951	34	0.229358	34	0.888889
35	0	35	0.142857	35	0.167969	35	0.398876	35	0.875	35	0.87963			35	0	35	0.0729167	35	0.363636	35	0.940678			35	0	35	0.0121951	35	0.229358	35	0.916667
36	0	36	0.142857	36	0.1875	36	0.455056	36	0.914773	36	0.907407			36	0	36	0.0729167	36	0.386364	36	0.949153			36	0	36	0.0121951	36	0.229358	36	0.927778
37	0	37	0.153846	37	0.195312	37	0.488764	37	0.920455	37	0.953704			37	0	37	0.0729167	37	0.409091	37	0.957627			37	0	37	0.0121951	37	0.238532	37	0.927778
38	0	38	0.153846	38	0.199219	38	0.505618	38	0.920455	38	0.972222			38	0	38	0.0729167	38	0.409091	38	0.957627			38	0	38	0.0121951	38	0.238532	38	0.933333
39	0	39	0.153846	39	0.214844	39	0.522472	39	0.931818	39	0.972222			39	0	39	0.0729167	39	0.431818	39	0.957627			39	0	39	0.0121951	39	0.247706	39	0.938889
40	0	40	0.153846	40	0.21875	40	0.533708	40	0.931818	40	0.981481			40	0	40	0.0729167	40	0.454545	40	0.966102			40	0	40	0.0121951	40	0.266055	40	0.955556
41	0	41	0.153846	41	0.226562	41	0.578652	41	0.931818	41	0.981481			41	0	41	0.0729167	41	0.454545	41	0.966102			41	0	41	0.0121951	41	0.293578	41	0.955556
42	0	42	0.164835	42	0.234375	42	0.58427	42	0.931818	42	0.981481			42	0	42	0.0729167	42	0.465909	42	0.974576			42	0	42	0.0121951	42	0.293578	42	0.961111
43	0	43	0.164835	43	0.242188	43	0.606742	43	0.9375	43	0.981481			43	0	43	0.0833333	43	0.488636	43	0.974576			43	0	43	0.0121951	43	0.302752	43	0.961111
44	0	44	0.164835	44	0.25	44	0.651685	44	0.9375	44	0.981481			44	0	44	0.0833333	44	0.5	44	0.974576			44	0	44	0.0121951	44	0.311927	44	0.966667
45	0	45	0.164835	45	0.257812	45	0.657303	45	0.9375	45	0.981481			45	0	45	0.0833333	45	0.5	45	0.974576			45	0	45	0.0121951	45	0.311927	45	0.966667
46	0	46	0.164835	46	0.277344	46	0.679775	46	0.9375	46	0.981481			46	0	46	0.0833333	46	0.511364	46	0.974576			46	0	46	0.0121951	46	0.311927	46	0.972222
47	0	47	0.164835	47	0.292969	47	0.685393	47	0.9375	47	0.981481			47	0	47	0.0833333	47	0.511364	47	0.974576			47	0	47	0.0121951	47	0.330275	47	0.972222
48	0	48	0.175824	48	0.304688	48	0.713483	48	0.9375	48	0.981481			48	0	48	0.0833333	48	0.522727	48	0.974576			48	0	48	0.0121951	48	0.33945	48	0.972222
49	0	49	0.175824	49	0.308594	49	0.741573	49	0.943182	49	0.981481			49	0	49	0.0833333	49	0.556818	49	0.974576			49	0	49	0.0121951	49	0.33945	49	0.972222
50	0	50	0.186813	50	0.324219	50	0.758427	50	0.943182	50	0.981481			50	0	50	0.135417	50	0.670455	50	0.983051			50	0	50	0.0121951	50	0.33945	50	0.983333
51	0	51	0.186813	51	0.335938	51	0.764045	51	0.948864	51	0.981481			51	0	51	0.135417	51	0.670455	51	0.983051			51	0	51	0.0182927	51	0.357798	51	0.983333
52	0	52	0.197802	52	0.335938	52	0.808989	52	0.948864	52	0.990741			52	0	52	0.15625	52	0.681818	52	0.983051			52	0	52	0.0182927	52	0.366972	52	0.983333
53	0	53	0.197802	53	0.363281	53	0.814607	53	0.948864	53	0.990741			53	0	53	0.15625	53	0.693182	53	0.983051			53	0	53	0.0243902	53	0.385321	53	0.983333
54	0	54	0.197802	54	0.363281	54	0.814607	54	0.954545	54	0.990741			54	0	54	0.166667	54	0.704545	54	0.983051			54	0	54	0.0243902	54	0.385321	54	0.988889
55	0	55	0.208791	55	0.375	55	0.814607	55	0.954545	55	0.990741			55	0	55	0.177083	55	0.715909	55	0.983051			55	0	55	0.0243902	55	0.422018	55	0.988889
56	0	56	0.208791	56	0.402344	56	0.825843	56	0.954545	56	1			56	0	56	0.197917	56	0.727273	56	0.983051			56	0	56	0.0304878	56	0.458716	56	0.988889
57	0	57	0.208791	57	0.402344	57	0.848315	57	0.954545	57	1			57	0	57	0.197917	57	0.727273	57	0.983051			57	0	57	0.0304878	57	0.477064	57	0.994444
58	0	58	0.208791	58	0.410156	58	0.848315	58	0.960227	58	1			58	0	58	0.197917	58	0.772727	58	0.983051			58	0	58	0.0365854	58	0.495413	58	0.994444
59	0	59	0.208791	59	0.410156	59	0.853933	59	0.960227	59	1			59	0	59	0.197917	59	0.772727	59	0.983051			59	0	59	0.0365854	59	0.495413	59	0.994444
60	0	60	0.208791	60	0.421875	60	0.853933	60	0.960227	60	1			60	0	60	0.239583	60	0.772727	60	0.983051			60	0	60	0.0365854	60	0.513761	60	0.994444
61	0	61	0.208791	61	0.445312	61	0.865169	61	0.965909	61	1			61	0	61	0.25	61	0.772727	61	0.983051			61	0	61	0.0365854	61	0.53211	61	0.994444
62	0	62	0.208791	62	0.464844	62	0.876404	62	0.965909	62	1			62	0	62	0.291667	62	0.772727	62	0.983051			62	0	62	0.0365854	62	0.559633	62	0.994444
63	0	63	0.21978	63	0.464844	63	0.876404	63	0.965909	63	1			63	0	63	0.291667	63	0.772727	63	0.983051			63	0	63	0.0365854	63	0.568807	63	0.994444
64	0	64	0.21978	64	0.464844	64	0.876404	64	0.965909	64	1			64	0	64	0.322917	64	0.784091	64	0.983051			64	0	64	0.0365854	64	0.568807	64	0.994444
65	0	65	0.230769	65	0.476562	65	0.893258	65	0.965909	65	1			65	0	65	0.322917	65	0.784091	65	0.983051			65	0	65	0.0426829	65	0.577982	65	0.994444
66	0	66	0.241758	66	0.476562	66	0.893258	66	0.965909	66	1			66	0	66	0.364583	66	0.784091	66	0.983051			66	0	66	0.0426829	66	0.577982	66	0.994444
67	0	67	0.241758	67	0.480469	67	0.898876	67	0.965909	67	1			67	0	67	0.364583	67	0.784091	67	0.983051			67	0	67	0.0487805	67	0.577982	67	0.994444
68	0	68	0.241758	68	0.492188	68	0.898876	68	0.965909	68	1			68	0	68	0.385417	68	0.795455	68	0.983051			68	0	68	0.054878	68	0.59633	68	0.994444
69	0	69	0.241758	69	0.503906	69	0.910112	69	0.965909	69	1			69	0	69	0.385417	69	0.795455	69	0.983051			69	0	69	0.054878	69	0.623853	69	0.994444
70	0	70	0.241758	70	0.503906	70	0.910112	70	0.965909	70	1			70	0	70	0.416667	70	0.795455	70	0.983051			70	0	70	0.0731707	70	0.623853	70	0.994444
71	0	71	0.241758	71	0.519531	71	0.910112	71	0.965909	71	1			71	0	71	0.416667	71	0.795455	71	0.983051			71	0	71	0.0792683	71	0.633028	71	0.994444
72	0	72	0.263736	72	0.539062	72	0.910112	72	0.965909	72	1			72	0	72	0.427083	72	0.818182	72	0.983051			72	0	72	0.0792683	72	0.633028	72	0.994444
73	0	73	0.263736	73	0.539062	73	0.910112	73	0.965909	73	1			73	0	73	0.427083	73	0.818182	73	0.983051			73	0	73	0.0792683	73	0.633028	73	0.994444
74	0	74	0.263736	74	0.539062	74	0.910112	74	0.965909	74	1			74	0	74	0.447917	74	0.818182	74	0.983051			74	0	74	0.0853659	74	0.642202	74	0.994444
75	0	75	0.263736	75	0.550781	75	0.91573	75	0.965909	75	1			75	0	75	0.447917	75	0.818182	75	0.983051			75	0	75	0.0853659	75	0.651376	75	0.994444
76	0	76	0.263736	76	0.550781	76	0.91573	76	0.965909	76	1			76	0	76	0.479167	76	0.818182	76	0.983051			76	0	76	0.0853659	76	0.651376	76	0.994444
77	0	77	0.263736	77	0.585938	77	0.926966	77	0.971591	77	1			77	0	77	0.479167	77	0.818182	77	0.983051			77	0	77	0.097561	77	0.651376	77	0.994444
78	0	78	0.263736	78	0.585938	78	0.926966	78	0.971591	78	1			78	0	78	0.489583	78	0.818182	78	0.983051			78	0	78	0.103659	78	0.66055	78	0.994444
79	0	79	0.263736	79	0.585938	79	0.932584	79	0.971591	79	1			79	0	79	0.489583	79	0.818182	79	0.983051			79	0	79	0.103659	79	0.66055	79	0.994444
80	0	80	0.263736	80	0.601562	80	0.932584	80	0.971591	80	1			80	0	80	0.5	80	0.829545	80	0.983051			80	0	80	0.121951	80	0.66055	80	0.994444
81	0	81	0.263736	81	0.601562	81	0.938202	81	0.971591	81	1			81	0	81	0.5	81	0.829545	81	0.983051			81	0	81	0.128049	81	0.66055	81	0.994444
82	0	82	0.263736	82	0.605469	82	0.938202	82	0.971591	82	1			82	0	82	0.5	82	0.840909	82	0.983051			82	0	82	0.134146	82	0.66055	82	0.994444
83	0	83	0.263736	83	0.605469	83	0.94382	83	0.971591	83	1			83	0	83	0.5	83	0.840909	83	0.983051			83	0	83	0.140244	83	0.66055	83	0.994444
84	0	84	0.274725	84	0.621094	84	0.94382	84	0.971591	84	1			84	0	84	0.5	84	0.840909	84	0.983051			84	0	84	0.146341	84	0.66055	84	0.994444
85	0	85	0.274725	85	0.648438	85	0.94382	85	0.971591	85	1			85	0	85	0.5	85	0.840909	85	0.983051			85	0	85	0.152439	85	0.66055	85	0.994444
86	0	86	0.274725	86	0.648438	86	0.94382	86	0.971591	86	1			86	0	86	0.520833	86	0.852273	86	0.983051			86	0	86	0.164634	86	0.66055	86	0.994444
87	0	87	0.274725	87	0.648438	87	0.955056	87	0.971591	87	1			87	0	87	0.520833	87	0.852273	87	0.983051			87	0	87	0.164634	87	0.66055	87	0.994444
88	0	88	0.274725	88	0.671875	88	0.955056	88	0.971591	88	1			88	0	88	0.541667	88	0.852273	88	0.983051			88	0	88	0.176829	88	0.66055	88	0.994444
89	0	89	0.274725	89	0.671875	89	0.960674	89	0.971591	89	1			89	0	89	0.541667	89	0.852273	89	0.983051			89	0	89	0.189024	89	0.66055	89	0.994444
90	0	90	0.274725	90	0.671875	90	0.960674	90	0.971591	90	1			90	0	90	0.5625	90	0.852273	90	0.983051			90	0	90	0.189024	90	0.697248	90	0.994444
91	0	91	0.274725	91	0.671875	91	0.960674	91	0.977273	91	1			91	0	91	0.5625	91	0.852273	91	0.983051			91	0	91	0.213415	91	0.697248	91	0.994444
92	0	92	0.274725	92	0.671875	92	0.960674	92	0.982955	92	1			92	0	92	0.572917	92	0.863636	92	0.983051			92	0	92	0.213415	92	0.697248	92	0.994444
93	0	93	0.285714	93	0.671875	93	0.960674	93	0.982955	93	1			93	0	93	0.572917	93	0.863636	93	0.983051			93	0	93	0.219512	93	0.697248	93	0.994444
94	0	94	0.285714	94	0.679688	94	0.960674	94	0.982955	94	1			94	0	94	0.583333	94	0.875	94	0.983051			94	0	94	0.219512	94	0.697248	94	0.994444
95	0	95	0.285714	95	0.683594	95	0.966292	95	0.982955	95	1			95	0	95	0.583333	95	0.875	95	0.983051			95	0	95	0.219512	95	0.697248	95	0.994444
96	0	96	0.285714	96	0.6875	96	0.966292	96	0.982955	96	1			96	0	96	0.604167	96	0.875	96	0.983051			96	0	96	0.219512	96	0.697248	96	0.994444
97	0	97	0.285714	97	0.6875	97	0.966292	97	0.982955	97	1			97	0	97	0.604167	97	0.875	97	0.983051			97	0	97	0.219512	97	0.697248	97	0.994444
98	0	98	0.285714	98	0.691406	98	0.966292	98	0.988636	98	1			98	0	98	0.625	98	0.886364	98	0.983051			98	0	98	0.231707	98	0.697248	98	0.994444
99	0	99	0.285714	99	0.691406	99	0.966292	99	0.988636	99	1			99	0	99	0.625	99	0.886364	99	0.983051			99	0	99	0.231707	99	0.733945	99	0.994444
100	0	100	0.318681	100	0.71875	100	0.966292	100	0.988636	100	1			100	0	100	0.645833	100	0.897727	100	0.983051			100	0	100	0.237805	100	0.733945	100	0.994444
101	0	101	0.318681	101	0.71875	101	0.966292	101	0.988636	101	1			101	0	101	0.645833	101	0.909091	101	0.983051			101	0	101	0.243902	101	0.733945	101	0.994444
102	0	102	0.32967	102	0.734375	102	0.966292	102	0.988636	102	1			102	0	102	0.645833	102	0.920455	102	0.983051			102	0	102	0.25	102	0.743119	102	0.994444
103	0	103	0.32967	103	0.734375	103	0.966292	103	0.994318	103	1			103	0	103	0.645833	103	0.920455	103	0.983051			103	0	103	0.262195	103	0.743119	103	0.994444
104	0	104	0.340659	104	0.746094	104	0.966292	104	0.994318	104	1			104	0	104	0.65625	104	0.920455	104	0.983051			104	0	104	0.268293	104	0.743119	104	0.994444
105	0	105	0.340659	105	0.746094	105	0.966292	105	0.994318	105	1			105	0	105	0.65625	105	0.920455	105	0.983051			105	0	105	0.268293	105	0.752294	105	0.994444
106	0	106	0.362637	106	0.75	106	0.966292	106	0.994318	106	1			106	0	106	0.666667	106	0.920455	106	0.983051			106	0	106	0.268293	106	0.752294	106	0.994444
107	0	107	0.362637	107	0.75	107	0.966292	107	0.994318	107	1			107	0	107	0.666667	107	0.931818	107	0.983051			107	0	107	0.27439	107	0.752294	107	0.994444
108	0	108	0.362637	108	0.75	108	0.966292	108	0.994318	108	1			108	0	108	0.666667	108	0.931818	108	0.983051			108	0	108	0.27439	108	0.770642	108	0.994444
109	0	109	0.362637	109	0.75	109	0.966292	109	0.994318	109	1			109	0	109	0.666667	109	0.931818	109	0.983051			109	0	109	0.27439	109	0.770642	109	0.994444
110	0	110	0.373626	110	0.75	110	0.966292	110	0.994318	110	1			110	0	110	0.666667	110	0.931818	110	0.983051			110	0	110	0.27439	110	0.770642	110	0.994444
111	0	111	0.373626	111	0.75	111	0.97191	111	0.994318	111	1			111	0	111	0.666667	111	0.931818	111	0.983051			111	0	111	0.280488	111	0.770642	111	0.994444
112	0	112	0.384615	112	0.75	112	0.97191	112	0.994318	112	1			112	0	112	0.677083	112	0.931818	112	0.983051			112	0	112	0.292683	112	0.770642	112	0.994444
113	0	113	0.384615	113	0.75	113	0.97191	113	0.994318	113	1			113	0	113	0.677083	113	0.931818	113	0.983051			113	0	113	0.29878	113	0.779817	113	0.994444
114	0	114	0.384615	114	0.757812	114	0.97191	114	0.994318	114	1			114	0	114	0.6875	114	0.931818	114	0.983051			114	0	114	0.29878	114	0.788991	114	0.994444
115	0	115	0.384615	115	0.757812	115	0.97191	115	0.994318	115	1			115	0	115	0.6875	115	0.931818	115	0.983051			115	0	115	0.310976	115	0.788991	115	0.994444
116	0	116	0.384615	116	0.757812	116	0.97191	116	0.994318	116	1			116	0	116	0.6875	116	0.943182	116	0.983051			116	0	116	0.317073	116	0.788991	116	0.994444
117	0	117	0.384615	117	0.757812	117	0.977528	117	0.994318	117	1			117	0	117	0.6875	117	0.943182	117	0.983051			117	0	117	0.323171	117	0.788991	117	0.994444
118	0	118	0.384615	118	0.765625	118	0.977528	118	0.994318	118	1			118	0	118	0.697917	118	0.943182	118	0.983051			118	0	118	0.329268	118	0.788991	118	0.994444
119	0	119	0.384615	119	0.765625	119	0.983146	119	0.994318	119	1			119	0	119	0.708333	119	0.943182	119	0.983051			119	0	119	0.329268	119	0.788991	119	0.994444
120	0	120	0.395604	120	0.765625	120	0.983146	120	0.994318	120	1			120	0	120	0.71875	120	0.943182	120	0.983051			120	0	120	0.378049	120	0.807339	120	0.994444
121	0	121	0.395604	121	0.765625	121	0.983146	121	0.994318	121	1			121	0	121	0.71875	121	0.943182	121	0.983051			121	0	121	0.378049	121	0.807339	121	0.994444
122	0	122	0.406593	122	0.777344	122	0.983146	122	0.994318	122	1			122	0	122	0.71875	122	0.943182	122	0.983051			122	0	122	0.378049	122	0.807339	122	0.994444
123	0	123	0.406593	123	0.777344	123	0.983146	123	0.994318	123	1			123	0	123	0.71875	123	0.943182	123	0.983051			123	0	123	0.378049	123	0.807339	123	0.994444
124	0	124	0.417582	124	0.777344	124	0.983146	124	0.994318	124	1			124	0	124	0.71875	124	0.943182	124	0.983051			124	0	124	0.384146	124	0.807339	124	0.994444
125	0	125	0.417582	125	0.777344	125	0.983146	125	0.994318	125	1			125	0	125	0.71875	125	0.943182	125	0.983051			125	0	125	0.384146	125	0.807339	125	0.994444
126	0	126	0.428571	126	0.785156	126	0.983146	126	0.994318	126	1			126	0	126	0.71875	126	0.943182	126	0.983051			126	0	126	0.396341	126	0.816514	126	0.994444
127	0	127	0.428571	127	0.785156	127	0.988764	127	0.994318	127	1			127	0	127	0.71875	127	0.943182	127	0.983051			127	0	127	0.396341	127	0.816514	127	0.994444
128	0	128	0.428571	128	0.785156	128	0.988764	128	0.994318	128	1			128	0	128	0.71875	128	0.954545	128	0.983051			128	0	128	0.402439	128	0.816514	128	0.994444
129	0	129	0.428571	129	0.785156	129	0.988764	129	0.994318	129	1			129	0	129	0.71875	129	0.954545	129	0.983051			129	0	129	0.426829	129	0.816514	129	0.994444
130	0	130	0.428571	130	0.789062	130	0.988764	130	0.994318	130	1			130	0	130	0.729167	130	0.954545	130	0.983051			130	0	130	0.426829	130	0.816514	130	0.994444
131	0	131	0.428571	131	0.789062	131	0.988764	131	0.994318	131	1			131	0	131	0.729167	131	0.954545	131	0.983051			131	0	131	0.426829	131	0.816514	131	0.994444
132	0	132	0.43956	132	0.789062	132	0.988764	132	0.994318	132	1			132	0	132	0.75	132	0.954545	132	0.991525			132	0	132	0.432927	132	0.825688	132	0.994444
133	0	133	0.43956	133	0.789062	133	0.988764	133	0.994318	133	1			133	0	133	0.75	133	0.954545	133	0.991525			133	0	133	0.432927	133	0.825688	133	0.994444
134	0	134	0.472527	134	0.792969	134	0.988764	134	0.994318	134	1			134	0	134	0.760417	134	0.954545	134	0.991525			134	0	134	0.432927	134	0.825688	134	0.994444
135	0	135	0.472527	135	0.792969	135	0.988764	135	0.994318	135	1			135	0	135	0.760417	135	0.954545	135	0.991525			135	0	135	0.47561	135	0.834862	135	0.994444
136	0	136	0.472527	136	0.800781	136	0.988764	136	0.994318	136	1			136	0	136	0.760417	136	0.954545	136	0.991525			136	0	136	0.481707	136	0.834862	136	0.994444
137	0	137	0.483516	137	0.800781	137	0.988764	137	0.994318	137	1			137	0	137	0.760417	137	0.954545	137	0.991525			137	0	137	0.481707	137	0.834862	137	0.994444
138	0	138	0.483516	138	0.820312	138	0.988764	138	0.994318	138	1			138	0	138	0.760417	138	0.954545	138	0.991525			138	0	138	0.5	138	0.834862	138	0.994444
139	0	139	0.483516	139	0.820312	139	0.988764	139	0.994318	139	1			139	0	139	0.760417	139	0.954545	139	0.991525			139	0	139	0.5	139	0.844037	139	0.994444
140	0	140	0.494505	140	0.820312	140	0.988764	140	0.994318	140	1			140	0	140	0.760417	140	0.954545	140	0.991525			140	0	140	0.5	140	0.844037	140	0.994444
141	0	141	0.494505	141	0.820312	141	0.988764	141	0.994318	141	1			141	0	141	0.760417	141	0.954545	141	0.991525			141	0	141	0.518293	141	0.844037	141	0.994444
142	0	142	0.494505	142	0.820312	142	0.988764	142	0.994318	142	1			142	0	142	0.760417	142	0.954545	142	0.991525			142	0	142	0.518293	142	0.844037	142	0.994444
143	0	143	0.494505	143	0.820312	143	0.988764	143	0.994318	143	1			143	0	143	0.760417	143	0.954545	143	0.991525			143	0	143	0.518293	143	0.844037	143	0.994444
144	0	144	0.494505	144	0.820312	144	0.988764	144	0.994318	144	1			144	0	144	0.78125	144	0.954545	144	0.991525			144	0	144	0.530488	144	0.844037	144	0.994444
145	0	145	0.494505	145	0.820312	145	0.988764	145	0.994318	145	1			145	0	145	0.78125	145	0.954545	145	0.991525			145	0	145	0.536585	145	0.844037	145	0.994444
146	0	146	0.494505	146	0.824219	146	0.988764	146	0.994318	146	1			146	0	146	0.78125	146	0.954545	146	0.991525			146	0	146	0.536585	146	0.844037	146	0.994444
147	0	147	0.494505	147	0.824219	147	0.988764	147	0.994318	147	1			147	0	147	0.78125	147	0.954545	147	0.991525			147	0	147	0.560976	147	0.853211	147	0.994444
148	0	148	0.505495	148	0.828125	148	0.988764	148	0.994318	148	1			148	0	148	0.78125	148	0.965909	148	0.991525			148	0	148	0.560976	148	0.853211	148	0.994444
149	0	149	0.505495	149	0.828125	149	0.988764	149	0.994318	149	1			149	0	149	0.78125	149	0.965909	149	0.991525			149	0	149	0.560976	149	0.853211	149	0.994444
150	0	150	0.505495	150	0.832031	150	0.988764	150	0.994318	150	1			150	0	150	0.78125	150	0.965909	150	0.991525			150	0	150	0.560976	150	0.862385	150	0.994444
151	0	151	0.505495	151	0.832031	151	0.988764	151	1	151	1			151	0	151	0.78125	151	0.965909	151	0.991525			151	0	151	0.567073	151	0.862385	151	1
152	0	152	0.505495	152	0.835938	152	0.988764	152	1	152	1			152	0	152	0.78125	152	0.965909	152	0.991525			152	0	152	0.573171	152	0.862385	152	1
153	0	153	0.505495	153	0.835938	153	0.988764	153	1	153	1			153	0	153	0.78125	153	0.965909	153	0.991525			153	0	153	0.579268	153	0.87156
154	0	154	0.505495	154	0.835938	154	0.988764	154	1	154	1			154	0	154	0.78125	154	0.965909	154	1			154	0	154	0.579268	154	0.87156
155	0	155	0.505495	155	0.835938	155	0.988764	155	1	155	1			155	0	155	0.78125	155	0.965909	155	1			155	0	155	0.579268	155	0.87156
156	0	156	0.505495	156	0.835938	156	0.988764	156	1	156	1			156	0	156	0.78125	156	0.965909					156	0	156	0.579268	156	0.87156
157	0	157	0.505495	157	0.835938	157	0.988764	157	1	157	1			157	0	157	0.78125	157	0.965909					157	0	157	0.579268	157	0.87156
158	0	158	0.505495	158	0.835938	158	0.988764	158	1	158	1			158	0	158	0.78125	158	0.965909					158	0	158	0.579268	158	0.87156
159	0	159	0.505495	159	0.835938	159	0.988764	159	1	159	1			159	0	159	0.78125	159	0.965909					159	0	159	0.579268	159	0.87156
160	0	160	0.505495	160	0.839844	160	0.988764	160	1	160	1			160	0	160	0.791667	160	0.965909					160	0	160	0.579268	160	0.87156
161	0	161	0.505495	161	0.839844	161	0.988764	161	1	161	1			161	0	161	0.791667	161	0.965909					161	0	161	0.579268	161	0.87156
162	0	162	0.505495	162	0.84375	162	0.988764	162	1	162	1			162	0	162	0.791667	162	0.965909					162	0	162	0.591463	162	0.880734
163	0	163	0.505495	163	0.84375	163	0.994382	163	1	163	1			163	0	163	0.791667	163	0.965909					163	0	163	0.591463	163	0.880734
164	0	164	0.516484	164	0.84375	164	0.994382	164	1	164	1			164	0	164	0.802083	164	0.965909					164	0	164	0.591463	164	0.880734
165	0	165	0.516484	165	0.84375	165	0.994382	165	1	165	1			165	0	165	0.802083	165	0.965909					165	0	165	0.591463	165	0.880734
166	0	166	0.527473	166	0.851562	166	0.994382	166	1	166	1			166	0	166	0.802083	166	0.965909					166	0	166	0.591463	166	0.880734
167	0	167	0.527473	167	0.851562	167	0.994382	167	1	167	1			167	0	167	0.802083	167	0.965909					167	0	167	0.591463	167	0.880734
168	0	168	0.527473	168	0.851562	168	0.994382	168	1	168	1			168	0	168	0.802083	168	0.965909					168	0	168	0.597561	168	0.889908
169	0	169	0.527473	169	0.851562	169	0.994382	169	1	169	1			169	0	169	0.802083	169	0.965909					169	0	169	0.597561	169	0.889908
170	0	170	0.527473	170	0.851562	170	0.994382	170	1	170	1			170	0	170	0.802083	170	0.965909					170	0	170	0.597561	170	0.889908
171	0	171	0.527473	171	0.851562	171	0.994382	171	1	171	1			171	0	171	0.802083	171	0.965909					171	0	171	0.597561	171	0.889908
172	0	172	0.527473	172	0.851562	172	0.994382	172	1	172	1			172	0	172	0.8125	172	0.965909					172	0	172	0.597561	172	0.889908
173	0	173	0.527473	173	0.851562	173	0.994382	173	1	173	1			173	0	173	0.8125	173	0.965909					173	0	173	0.597561	173	0.889908
174	0	174	0.527473	174	0.859375	174	0.994382	174	1	174	1			174	0	174	0.822917	174	0.965909					174	0	174	0.603659	174	0.889908
175	0	175	0.527473	175	0.859375	175	0.994382	175	1	175	1			175	0	175	0.822917	175	0.965909					175	0	175	0.603659	175	0.889908
176	0	176	0.527473	176	0.859375	176	0.994382	176	1	176	1			176	0	176	0.822917	176	0.965909					176	0	176	0.603659	176	0.889908
177	0	177	0.527473	177	0.859375	177	0.994382	177	1	177	1			177	0	177	0.822917	177	0.965909					177	0	177	0.603659	177	0.889908
178	0	178	0.538462	178	0.859375	178	0.994382	178	1	178	1			178	0	178	0.822917	178	0.965909					178	0	178	0.603659	178	0.889908
179	0	179	0.538462	179	0.859375	179	0.994382	179	1	179	1			179	0	179	0.822917	179	0.965909					179	0	179	0.603659	179	0.889908
180	0	180	0.549451	180	0.867188	180	0.994382	180	1	180	1			180	0	180	0.822917	180	0.965909					180	0	180	0.609756	180	0.889908
181	0	181	0.549451	181	0.867188	181	0.994382	181	1	181	1			181	0	181	0.822917	181	0.965909					181	0	181	0.609756	181	0.889908
182	0	182	0.56044	182	0.871094	182	0.994382	182	1	182	1			182	0	182	0.822917	182	0.965909					182	0	182	0.609756	182	0.889908
183	0	183	0.56044	183	0.871094	183	0.994382	183	1	183	1			183	0	183	0.822917	183	0.965909					183	0	183	0.621951	183	0.889908
184	0	184	0.582418	184	0.871094	184	0.994382	184	1	184	1			184	0	184	0.822917	184	0.965909					184	0	184	0.621951	184	0.889908
185	0	185	0.582418	185	0.871094	185	0.994382	185	1	185	1			185	0	185	0.822917	185	0.965909					185	0	185	0.621951	185	0.889908
186	0	186	0.582418	186	0.871094	186	0.994382	186	1	186	1			186	0	186	0.822917	186	0.965909					186	0	186	0.634146	186	0.889908
187	0	187	0.582418	187	0.871094	187	0.994382	187	1	187	1			187	0	187	0.822917	187	0.965909					187	0	187	0.634146	187	0.889908
188	0	188	0.582418	188	0.871094	188	0.994382	188	1	188	1			188	0	188	0.822917	188	0.965909					188	0	188	0.634146	188	0.889908
189	0	189	0.582418	189	0.871094	189	0.994382	189	1	189	1			189	0	189	0.822917	189	0.965909					189	0	189	0.634146	189	0.889908
190	0	190	0.582418	190	0.871094	190	0.994382	190	1	190	1			190	0	190	0.822917	190	0.965909					190	0	190	0.634146	190	0.889908
191	0	191	0.582418	191	0.871094	191	0.994382	191	1	191	1			191	0	191	0.822917	191	0.965909					191	0	191	0.634146	191	0.889908
192	0	192	0.582418	192	0.871094	192	0.994382	192	1	192	1			192	0	192	0.822917	192	0.965909					192	0	192	0.634146	192	0.889908
193	0	193	0.582418	193	0.871094	193	0.994382	193	1	193	1			193	0	193	0.822917	193	0.965909					193	0	193	0.634146	193	0.889908
194	0	194	0.593407	194	0.875	194	0.994382	194	1	194	1			194	0	194	0.822917	194	0.965909					194	0	194	0.634146	194	0.889908
195	0	195	0.593407	195	0.875	195	0.994382	195	1	195	1			195	0	195	0.822917	195	0.965909					195	0	195	0.634146	195	0.889908
196	0	196	0.593407	196	0.875	196	0.994382	196	1	196	1			196	0	196	0.822917	196	0.965909					196	0	196	0.634146	196	0.889908
197	0	197	0.593407	197	0.875	197	0.994382	197	1	197	1			197	0	197	0.822917	197	0.965909					197	0	197	0.634146	197	0.889908
198	0	198	0.593407	198	0.875	198	0.994382	198	1	198	1			198	0	198	0.822917	198	0.965909					198	0	198	0.640244	198	0.889908
199	0	199	0.593407	199	0.875	199	0.994382	199	1	199	1			199	0	199	0.822917	199	0.965909					199	0	199	0.640244	199	0.889908
200	0	200	0.593407	200	0.875	200	0.994382	200	1	200	1			200	0	200	0.822917	200	0.965909					200	0	200	0.640244	200	0.889908
201	0	201	0.593407	201	0.875	201	0.994382	201	1	201	1			201	0	201	0.822917	201	0.965909					201	0	201	0.652439	201	0.889908
202	0	202	0.593407	202	0.875	202	0.994382	202	1	202	1			202	0	202	0.822917	202	0.965909					202	0	202	0.652439	202	0.889908
203	0	203	0.593407	203	0.875	203	0.994382	203	1	203	1			203	0	203	0.822917	203	0.965909					203	0	203	0.652439	203	0.889908
204	0	204	0.593407	204	0.875	204	0.994382	204	1	204	1			204	0	204	0.822917	204	0.965909					204	0	204	0.658537	204	0.889908
205	0	205	0.593407	205	0.875	205	0.994382	205	1	205	1			205	0	205	0.822917	205	0.965909					205	0	205	0.658537	205	0.889908
206	0	206	0.593407	206	0.878906	206	0.994382	206	1	206	1			206	0	206	0.822917	206	0.965909					206	0	206	0.658537	206	0.889908
207	0	207	0.593407	207	0.878906	207	0.994382	207	1	207	1			207	0	207	0.822917	207	0.965909					207	0	207	0.670732	207	0.889908
208	0	208	0.615385	208	0.878906	208	0.994382	208	1	208	1			208	0	208	0.822917	208	0.965909					208	0	208	0.670732	208	0.889908
209	0	209	0.615385	209	0.878906	209	0.994382	209	1	209	1			209	0	209	0.822917	209	0.965909					209	0	209	0.676829	209	0.889908
210	0	210	0.615385	210	0.882812	210	0.994382	210	1	210	1			210	0	210	0.822917	210	0.965909					210	0	210	0.689024	210	0.889908
211	0	211	0.615385	211	0.882812	211	0.994382	211	1	211	1			211	0	211	0.822917	211	0.965909					211	0	211	0.689024	211	0.889908
212	0	212	0.615385	212	0.882812	212	0.994382	212	1	212	1			212	0	212	0.833333	212	0.965909					212	0	212	0.689024	212	0.889908
213	0	213	0.615385	213	0.882812	213	0.994382	213	1	213	1			213	0	213	0.833333	213	0.965909					213	0	213	0.689024	213	0.889908
214	0	214	0.615385	214	0.886719	214	0.994382	214	1	214	1			214	0	214	0.833333	214	0.977273					214	0	214	0.689024	214	0.889908
215	0	215	0.615385	215	0.886719	215	0.994382	215	1	215	1			215	0	215	0.833333	215	0.977273					215	0	215	0.689024	215	0.889908
216	0	216	0.615385	216	0.886719	216	0.994382	216	1	216	1			216	0	216	0.84375	216	0.977273					216	0	216	0.689024	216	0.889908
217	0	217	0.615385	217	0.886719	217	0.994382	217	1	217	1			217	0	217	0.84375	217	0.977273					217	0	217	0.689024	217	0.889908
218	0	218	0.626374	218	0.886719	218	0.994382	218	1	218	1			218	0	218	0.84375	218	0.977273					218	0	218	0.689024	218	0.889908
219	0	219	0.626374	219	0.886719	219	0.994382	219	1	219	1			219	0	219	0.84375	219	0.977273					219	0	219	0.695122	219	0.889908
220	0	220	0.626374	220	0.890625	220	0.994382	220	1	220	1			220	0	220	0.84375	220	0.977273					220	0	220	0.695122	220	0.889908
221	0	221	0.626374	221	0.890625	221	0.994382	221	1	221	1			221	0	221	0.84375	221	0.977273					221	0	221	0.695122	221	0.889908
222	0	222	0.626374	222	0.890625	222	0.994382	222	1	222	1			222	0	222	0.84375	222	0.977273					222	0	222	0.70122	222	0.899083
223	0	223	0.626374	223	0.890625	223	0.994382	223	1	223	1			223	0	223	0.84375	223	0.977273					223	0	223	0.70122	223	0.899083
224	0	224	0.626374	224	0.890625	224	0.994382	224	1	224	1			224	0	224	0.84375	224	0.977273					224	0	224	0.70122	224	0.899083
225	0	225	0.626374	225	0.890625	225	0.994382	225	1	225	1			225	0	225	0.84375	225	0.977273					225	0	225	0.707317	225	0.899083
226	0	226	0.626374	226	0.890625	226	0.994382	226	1	226	1			226	0	226	0.84375	226	0.977273					226	0	226	0.707317	226	0.899083
227	0	227	0.626374	227	0.890625	227	0.994382	227	1	227	1			227	0	227	0.84375	227	0.977273					227	0	227	0.707317	227	0.899083
228	0	228	0.637363	228	0.898438	228	1	228	1	228	1			228	0	228	0.84375	228	0.977273					228	0	228	0.713415	228	0.899083
229	0	229	0.637363	229	0.898438	229	1	229	1	229	1			229	0	229	0.84375	229	0.977273					229	0	229	0.713415	229	0.899083
230	0	230	0.637363	230	0.898438	230	1	230	1	230	1			230	0	230	0.84375	230	0.977273					230	0	230	0.713415	230	0.899083
231	0	231	0.648352	231	0.898438	231	1	231	1	231	1			231	0	231	0.84375	231	0.977273					231	0	231	0.731707	231	0.899083
232	0	232	0.648352	232	0.898438	232	1	232	1	232	1			232	0	232	0.84375	232	0.977273					232	0	232	0.731707	232	0.899083
233	0	233	0.648352	233	0.898438	233	1	233	1	233	1			233	0	233	0.84375	233	0.977273					233	0	233	0.731707	233	0.899083
234	0	234	0.648352	234	0.898438	234	1	234	1	234	1			234	0	234	0.84375	234	0.977273					234	0	234	0.731707	234	0.899083
235	0	235	0.648352	235	0.898438	235	1	235	1	235	1			235	0	235	0.84375	235	0.977273					235	0	235	0.731707	235	0.899083
236	0	236	0.648352	236	0.898438	236	1	236	1	236	1			236	0	236	0.854167	236	0.977273					236	0	236	0.731707	236	0.899083
237	0	237	0.648352	237	0.898438	237	1	237	1	237	1			237	0	237	0.854167	237	0.977273					237	0	237	0.731707	237	0.899083
238	0	238	0.648352	238	0.898438	238	1	238	1	238	1			238	0	238	0.854167	238	0.977273					238	0	238	0.731707	238	0.899083
239	0	239	0.648352	239	0.898438	239	1	239	1	239	1			239	0	239	0.854167	239	0.977273					239	0	239	0.731707	239	0.899083
240	0	240	0.648352	240	0.898438	240	1	240	1	240	1			240	0	240	0.854167	240	0.977273					240	0	240	0.737805	240	0.899083
241	0	241	0.648352	241	0.898438	241	1	241	1	241	1			241	0	241	0.854167	241	0.977273					241	0	241	0.737805	241	0.899083
242	0	242	0.648352	242	0.898438	242	1	242	1	242	1			242	0	242	0.854167	242	0.977273					242	0	242	0.737805	242	0.899083
243	0	243	0.648352	243	0.898438	243	1	243	1	243	1			243	0	243	0.854167	243	0.977273					243	0	243	0.743902	243	0.899083
244	0	244	0.648352	244	0.898438	244	1	244	1	244	1			244	0	244	0.854167	244	0.977273					244	0	244	0.743902	244	0.899083
245	0	245	0.648352	245	0.898438	245	1	245	1	245	1			245	0	245	0.854167	245	0.977273					245	0	245	0.743902	245	0.899083
246	0	246	0.648352	246	0.898438	246	1	246	1	246	1			246	0	246	0.854167	246	0.977273					246	0	246	0.743902	246	0.899083
247	0	247	0.648352	247	0.902344	247	1	247	1	247	1			247	0	247	0.854167	247	0.977273					247	0	247	0.743902	247	0.899083
248	0	248	0.648352	248	0.902344	248	1	248	1	248	1			248	0	248	0.854167	248	0.977273					248	0	248	0.743902	248	0.899083
249	0	249	0.648352	249	0.902344	249	1	249	1	249	1			249	0	249	0.854167	249	0.977273					249	0	249	0.743902	249	0.899083
250	0	250	0.648352	250	0.902344	250	1	250	1	250	1			250	0	250	0.854167	250	0.977273					250	0	250	0.743902	250	0.899083
251	0	251	0.648352	251	0.902344	251	1	251	1	251	1			251	0	251	0.854167	251	0.977273					251	0	251	0.743902	251	0.899083
252	0	252	0.648352	252	0.90625	252	1	252	1	252	1			252	0	252	0.854167	252	0.977273					252	0	252	0.75	252	0.899083
253	0	253	0.648352	253	0.90625	253	1	253	1	253	1			253	0	253	0.854167	253	0.977273					253	0	253	0.75	253	0.899083
254	0	254	0.659341	254	0.90625	254	1	254	1	254	1			254	0	254	0.854167	254	0.977273					254	0	254	0.75	254	0.899083
255	0	255	0.659341	255	0.90625	255	1	255	1	255	1			255	0	255	0.854167	255	0.977273					255	0	255	0.756098	255	0.899083
256	0	256	0.659341	256	0.910156	256	1	256	1	256	1			256	0	256	0.854167	256	0.977273					256	0	256	0.756098	256	0.899083
257	0	257	0.659341	257	0.910156	257	1	257	1	257	1			257	0	257	0.854167	257	0.977273					257	0	257	0.756098	257	0.899083
258	0	258	0.67033	258	0.914062	258	1	258	1	258	1			258	0	258	0.854167	258	0.977273					258	0	258	0.762195	258	0.899083
259	0	259	0.67033	259	0.914062	259	1	259	1	259	1			259	0	259	0.854167	259	0.977273					259	0	259	0.762195	259	0.899083
260	0	260	0.681319	260	0.914062	260	1	260	1	260	1			260	0	260	0.854167	260	0.977273					260	0	260	0.762195	260	0.899083
261	0	261	0.681319	261	0.914062	261	1	261	1	261	1			261	0	261	0.854167	261	0.977273					261	0	261	0.768293	261	0.899083
262	0	262	0.681319	262	0.917969	262	1	262	1	262	1			262	0	262	0.854167	262	0.977273					262	0	262	0.768293	262	0.899083
263	0	263	0.681319	263	0.917969	263	1	263	1	263	1			263	0	263	0.854167	263	0.977273					263	0	263	0.768293	263	0.899083
264	0	264	0.681319	264	0.917969	264	1	264	1	264	1			264	0	264	0.854167	264	0.977273					264	0	264	0.786585	264	0.899083
265	0	265	0.681319	265	0.917969	265	1	265	1	265	1			265	0	265	0.854167	265	0.977273					265	0	265	0.786585	265	0.899083
266	0	266	0.681319	266	0.917969	266	1	266	1	266	1			266	0	266	0.854167	266	0.977273					266	0	266	0.786585	266	0.899083
267	0	267	0.681319	267	0.917969	267	1	267	1	267	1			267	0	267	0.854167	267	0.977273					267	0	267	0.79878	267	0.899083
268	0	268	0.681319	268	0.917969	268	1	268	1	268	1			268	0	268	0.854167	268	0.977273					268	0	268	0.79878	268	0.899083
269	0	269	0.681319	269	0.917969	269	1	269	1	269	1			269	0	269	0.854167	269	0.977273					269	0	269	0.79878	269	0.899083
270	0	270	0.681319	270	0.917969	270	1	270	1	270	1			270	0	270	0.854167	270	0.977273					270	0	270	0.804878	270	0.899083
271	0	271	0.681319	271	0.917969	271	1	271	1	271	1			271	0	271	0.854167	271	0.977273					271	0	271	0.804878	271	0.899083
272	0	272	0.692308	272	0.921875	272	1	272	1	272	1			272	0	272	0.854167	272	0.977273					272	0	272	0.804878	272	0.899083
273	0	273	0.692308	273	0.921875	273	1	273	1	273	1			273	0	273	0.854167	273	0.977273					273	0	273	0.817073	273	0.899083
274	0	274	0.692308	274	0.921875	274	1	274	1	274	1			274	0	274	0.854167	274	0.977273					274	0	274	0.817073	274	0.899083
275	0	275	0.692308	275	0.921875	275	1	275	1	275	1			275	0	275	0.854167	275	0.977273					275	0	275	0.817073	275	0.899083
276	0	276	0.692308	276	0.921875	276	1	276	1	276	1			276	0	276	0.854167	276	0.977273					276	0	276	0.817073	276	0.899083
277	0	277	0.692308	277	0.921875	277	1	277	1	277	1			277	0	277	0.854167	277	0.977273					277	0	277	0.817073	277	0.899083
278	0	278	0.692308	278	0.921875	278	1	278	1	278	1			278	0	278	0.854167	278	0.977273					278	0	278	0.817073	278	0.899083
279	0	279	0.692308	279	0.921875	279	1	279	1	279	1			279	0	279	0.854167	279	0.977273					279	0	279	0.817073	279	0.899083
280	0	280	0.692308	280	0.921875	280	1	280	1	280	1			280	0	280	0.854167	280	0.977273					280	0	280	0.817073	280	0.899083
281	0	281	0.692308	281	0.921875	281	1	281	1	281	1			281	0	281	0.854167	281	0.977273					281	0	281	0.817073	281	0.899083
282	0	282	0.692308	282	0.921875	282	1	282	1	282	1			282	0	282	0.854167	282	0.977273					282	0	282	0.829268	282	0.899083
283	0	283	0.692308	283	0.921875	283	1	283	1	283	1			283	0	283	0.854167	283	0.977273					283	0	283	0.829268	283	0.899083
284	0	284	0.703297	284	0.921875	284	1	284	1	284	1			284	0	284	0.854167	284	0.977273					284	0	284	0.829268	284	0.899083
285	0	285	0.703297	285	0.921875	285	1	285	1	285	1			285	0	285	0.854167	285	0.977273					285	0	285	0.835366	285	0.899083
286	0	286	0.703297	286	0.921875	286	1	286	1	286	1			286	0	286	0.854167	286	0.977273					286	0	286	0.835366	286	0.899083
287	0	287	0.703297	287	0.921875	287	1	287	1	287	1			287	0	287	0.854167	287	0.977273					287	0	287	0.835366	287	0.899083
288	0	288	0.703297	288	0.921875	288	1	288	1	288	1			288	0	288	0.854167	288	0.977273					288	0	288	0.841463	288	0.899083
289	0	289	0.703297	289	0.921875	289	1	289	1	289	1			289	0	289	0.854167	289	0.977273					289	0	289	0.841463	289	0.899083
290	0	290	0.703297	290	0.921875	290	1	290	1	290	1			290	0	290	0.854167	290	0.977273					290	0	290	0.841463	290	0.899083
291	0	291	0.703297	291	0.921875	291	1	291	1	291	1			291	0	291	0.854167	291	0.977273					291	0	291	0.841463	291	0.899083
292	0	292	0.703297	292	0.921875	292	1	292	1	292	1			292	0	292	0.854167	292	0.977273					292	0	292	0.841463	292	0.899083
293	0	293	0.703297	293	0.921875	293	1	293	1	293	1			293	0	293	0.854167	293	0.977273					293	0	293	0.841463	293	0.899083
294	0	294	0.703297	294	0.921875	294	1	294	1	294	1			294	0	294	0.854167	294	0.977273					294	0	294	0.841463	294	0.899083
295	0	295	0.703297	295	0.921875	295	1	295	1	295	1			295	0	295	0.854167	295	0.977273					295	0	295	0.841463	295	0.899083
296	0	296	0.703297	296	0.921875	296	1	296	1	296	1			296	0	296	0.854167	296	0.977273					296	0	296	0.841463	296	0.899083
297	0	297	0.703297	297	0.921875	297	1	297	1	297	1			297	0	297	0.854167	297	0.977273					297	0	297	0.841463	297	0.899083
298	0	298	0.714286	298	0.921875	298	1	298	1	298	1			298	0	298	0.854167	298	0.977273					298	0	298	0.841463	298	0.899083
299	0	299	0.714286	299	0.921875	299	1	299	1	299	1			299	0	299	0.854167	299	0.977273					299	0	299	0.841463	299	0.899083
300	0	300	0.714286	300	0.921875	300	1	300	1	300	1			300	0	300	0.854167	300	0.977273					300	0	300	0.841463	300	0.899083
301	0	301	0.714286	301	0.921875	301	1	301	1	301	1			301	0	301	0.854167	301	0.977273					301	0	301	0.841463	301	0.899083
302	0	302	0.714286	302	0.921875	302	1	302	1	302	1			302	0	302	0.854167	302	0.977273					302	0	302	0.841463	302	0.899083
303	0	303	0.714286	303	0.921875	303	1	303	1	303	1			303	0	303	0.854167	303	0.977273					303	0	303	0.847561	303	0.899083
304	0	304	0.714286	304	0.921875	304	1	304	1	304	1			304	0	304	0.854167	304	0.988636					304	0	304	0.847561	304	0.899083
305	0	305	0.714286	305	0.921875	305	1	305	1	305	1			305	0	305	0.854167	305	0.988636					305	0	305	0.847561	305	0.899083
306	0	306	0.714286	306	0.921875	306	1	306	1	306	1			306	0	306	0.854167	306	0.988636					306	0	306	0.847561	306	0.899083
307	0	307	0.714286	307	0.921875	307	1	307	1	307	1			307	0	307	0.854167	307	0.988636					307	0	307	0.847561	307	0.899083
308	0	308	0.714286	308	0.921875	308	1	308	1	308	1			308	0	308	0.854167	308	0.988636					308	0	308	0.847561	308	0.899083
309	0	309	0.714286	309	0.921875	309	1	309	1	309	1			309	0	309	0.854167	309	0.988636					309	0	309	0.847561	309	0.899083
310	0	310	0.714286	310	0.921875	310	1	310	1	310	1			310	0	310	0.854167	310	0.988636					310	0	310	0.847561	310	0.899083
311	0	311	0.714286	311	0.921875	311	1	311	1	311	1			311	0	311	0.854167	311	0.988636					311	0	311	0.847561	311	0.899083
312	0	312	0.714286	312	0.921875	312	1	312	1	312	1			312	0	312	0.854167	312	0.988636					312	0	312	0.847561
313	0	313	0.714286	313	0.921875	313	1	313	1	313	1			313	0	313	0.854167	313	0.988636					313	0	313	0.847561
314	0	314	0.725275	314	0.921875	314	1	314	1	314	1			314	0	314	0.854167	314	0.988636					314	0	314	0.847561
315	0	315	0.725275	315	0.921875	315	1	315	1	315	1			315	0	315	0.854167	315	0.988636					315	0	315	0.847561
316	0	316	0.725275	316	0.921875	316	1	316	1	316	1			316	0	316	0.854167	316	0.988636					316	0	316	0.847561
317	0	317	0.725275	317	0.921875	317	1	317	1	317	1			317	0	317	0.854167	317	0.988636					317	0	317	0.847561
318	0	318	0.725275	318	0.921875	318	1	318	1	318	1			318	0	318	0.854167	318	0.988636					318	0	318	0.847561
319	0	319	0.725275	319	0.921875	319	1	319	1	319	1			319	0	319	0.854167	319	0.988636					319	0	319	0.847561
320	0	320	0.725275	320	0.921875	320	1	320	1	320	1			320	0	320	0.854167	320	0.988636					320	0	320	0.847561
321	0	321	0.725275	321	0.921875	321	1	321	1	321	1			321	0	321	0.854167	321	0.988636					321	0	321	0.847561
322	0	322	0.725275	322	0.921875	322	1	322	1	322	1			322	0	322	0.854167	322	0.988636					322	0	322	0.847561
323	0	323	0.725275	323	0.921875	323	1	323	1	323	1			323	0	323	0.854167	323	0.988636					323	0	323	0.853659
324	0	324	0.725275	324	0.925781	324	1	324	1	324	1			324	0	324	0.854167	324	0.988636					324	0	324	0.853659
325	0	325	0.725275	325	0.925781	325	1	325	1	325	1			325	0	325	0.854167	325	0.988636					325	0	325	0.853659
326	0	326	0.736264	326	0.925781	326	1	326	1	326	1			326	0	326	0.854167	326	0.988636					326	0	326	0.853659
327	0	327	0.736264	327	0.925781	327	1	327	1	327	1			327	0	327	0.854167	327	0.988636					327	0	327	0.853659
328	0	328	0.747253	328	0.925781	328	1	328	1	328	1			328	0	328	0.854167	328	0.988636					328	0	328	0.853659
329	0	329	0.747253	329	0.925781	329	1	329	1	329	1			329	0	329	0.854167	329	0.988636					329	0	329	0.853659
330	0	330	0.747253	330	0.925781	330	1	330	1	330	1			330	0	330	0.875	330	0.988636					330	0	330	0.853659
331	0	331	0.747253	331	0.925781	331	1	331	1	331	1			331	0	331	0.875	331	0.988636					331	0	331	0.853659
332	0	332	0.747253	332	0.925781	332	1	332	1	332	1			332	0	332	0.875	332	0.988636					332	0	332	0.853659
333	0	333	0.747253	333	0.925781	333	1	333	1	333	1			333	0	333	0.875	333	0.988636					333	0	333	0.853659
334	0	334	0.747253	334	0.929688	334	1	334	1	334	1			334	0	334	0.875	334	0.988636					334	0	334	0.853659
335	0	335	0.747253	335	0.929688	335	1	335	1	335	1			335	0	335	0.875	335	0.988636					335	0	335	0.853659
336	0	336	0.747253	336	0.929688	336	1	336	1	336	1			336	0	336	0.875	336	0.988636					336	0	336	0.865854
337	0	337	0.747253	337	0.929688	337	1	337	1	337	1			337	0	337	0.875	337	0.988636					337	0	337	0.865854
338	0	338	0.747253	338	0.929688	338	1	338	1	338	1			338	0	338	0.875	338	0.988636					338	0	338	0.865854
339	0	339	0.747253	339	0.929688	339	1	339	1	339	1			339	0	339	0.875	339	0.988636					339	0	339	0.871951
340	0	340	0.747253	340	0.929688	340	1	340	1	340	1			340	0	340	0.875	340	0.988636					340	0	340	0.871951
341	0	341	0.747253	341	0.929688	341	1	341	1	341	1			341	0	341	0.875	341	0.988636					341	0	341	0.871951
342	0	342	0.747253	342	0.929688	342	1	342	1	342	1			342	0	342	0.875	342	0.988636					342	0	342	0.878049
343	0	343	0.747253	343	0.929688	343	1	343	1	343	1			343	0	343	0.875	343	0.988636					343	0	343	0.878049
344	0	344	0.747253	344	0.929688	344	1	344	1	344	1			344	0	344	0.875	344	0.988636					344	0	344	0.878049
345	0	345	0.747253	345	0.929688	345	1	345	1	345	1			345	0	345	0.875	345	0.988636					345	0	345	0.878049
346	0	346	0.747253	346	0.929688	346	1	346	1	346	1			346	0	346	0.875	346	0.988636					346	0	346	0.878049
347	0	347	0.747253	347	0.929688	347	1	347	1	347	1			347	0	347	0.875	347	0.988636					347	0	347	0.878049
348	0	348	0.747253	348	0.929688	348	1	348	1	348	1			348	0	348	0.875	348	0.988636					348	0	348	0.878049
349	0	349	0.747253	349	0.929688	349	1	349	1	349	1			349	0	349	0.875	349	0.988636					349	0	349	0.878049
350	0	350	0.747253	350	0.929688	350	1	350	1	350	1			350	0	350	0.875	350	0.988636					350	0	350	0.878049
351	0	351	0.747253	351	0.929688	351	1	351	1	351	1			351	0	351	0.875	351	0.988636					351	0	351	0.878049
352	0	352	0.747253	352	0.929688	352	1	352	1	352	1			352	0	352	0.875	352	0.988636					352	0	352	0.878049
353	0	353	0.747253	353	0.929688	353	1	353	1	353	1			353	0	353	0.875	353	0.988636					353	0	353	0.878049
354	0	354	0.747253	354	0.929688	354	1	354	1	354	1			354	0	354	0.875	354	0.988636					354	0	354	0.884146
355	0	355	0.747253	355	0.929688	355	1	355	1	355	1			355	0	355	0.875	355	0.988636					355	0	355	0.884146
356	0	356	0.747253	356	0.929688	356	1	356	1	356	1			356	0	356	0.875	356	0.988636					356	0	356	0.884146
357	0	357	0.747253	357	0.929688	357	1	357	1	357	1			357	0	357	0.875	357	0.988636					357	0	357	0.884146
358	0	358	0.747253	358	0.929688	358	1	358	1	358	1			358	0	358	0.875	358	0.988636					358	0	358	0.884146
359	0	359	0.747253	359	0.929688	359	1	359	1	359	1			359	0	359	0.875	359	0.988636					359	0	359	0.884146
360	0	360	0.747253	360	0.929688	360	1	360	1	360	1			360	0	360	0.875	360	0.988636					360	0	360	0.884146
361	0	361	0.747253	361	0.929688	361	1	361	1					361	0	361	0.875	361	0.988636					361	0	361	0.890244
362	0	362	0.747253	362	0.929688	362	1	362	1					362	0	362	0.875	362	0.988636					362	0	362	0.890244
363	0	363	0.747253	363	0.929688	363	1	363	1					363	0	363	0.875	363	0.988636					363	0	363	0.890244
364	0	364	0.747253	364	0.929688	364	1	364	1					364	0	364	0.875	364	0.988636					364	0	364	0.890244
365	0	365	0.747253	365	0.929688	365	1	365	1					365	0	365	0.875	365	0.988636					365	0	365	0.890244
366	0	366	0.758242	366	0.929688	366	1	366	1					366	0	366	0.875	366	0.988636					366	0	366	0.896341
367	0	367	0.758242	367	0.929688	367	1	367	1					367	0	367	0.875	367	0.988636					367	0	367	0.896341
368	0	368	0.758242	368	0.929688	368	1	368	1					368	0	368	0.875	368	0.988636					368	0	368	0.896341
369	0	369	0.758242	369	0.929688	369	1	369	1					369	0	369	0.875	369	0.988636					369	0	369	0.896341
370	0	370	0.758242	370	0.929688	370	1	370	1					370	0	370	0.875	370	0.988636					370	0	370	0.896341
371	0	371	0.758242	371	0.929688	371	1	371	1					371	0	371	0.875	371	0.988636					371	0	371	0.896341
372	0	372	0.758242	372	0.929688	372	1	372	1					372	0	372	0.875	372	0.988636					372	0	372	0.896341
373	0	373	0.758242	373	0.929688	373	1	373	1					373	0	373	0.875	373	0.988636					373	0	373	0.896341
374	0	374	0.758242	374	0.929688	374	1	374	1					374	0	374	0.875	374	0.988636					374	0	374	0.896341
375	0	375	0.758242	375	0.929688	375	1	375	1					375	0	375	0.875	375	0.988636					375	0	375	0.896341
376	0	376	0.758242	376	0.929688	376	1	376	1					376	0	376	0.875	376	0.988636					376	0	376	0.896341
377	0	377	0.758242	377	0.929688	377	1	377	1					377	0	377	0.875	377	0.988636					377	0	377	0.896341
378	0	378	0.758242	378	0.929688	378	1	378	1					378	0	378	0.875	378	0.988636					378	0	378	0.902439
379	0	379	0.758242	379	0.929688	379	1	379	1					379	0	379	0.875	379	0.988636					379	0	379	0.902439
380	0	380	0.758242	380	0.929688	380	1	380	1					380	0	380	0.875	380	0.988636					380	0	380	0.902439
381	0	381	0.758242	381	0.929688	381	1	381	1					381	0	381	0.875	381	0.988636					381	0	381	0.902439
382	0	382	0.758242	382	0.929688	382	1	382	1					382	0	382	0.875	382	0.988636					382	0	382	0.902439
383	0	383	0.758242	383	0.929688	383	1	383	1					383	0	383	0.875	383	0.988636					383	0	383	0.902439
384	0	384	0.758242	384	0.929688	384	1	384	1					384	0	384	0.875	384	0.988636					384	0	384	0.902439
385	0	385	0.758242	385	0.929688	385	1	385	1					385	0	385	0.875	385	0.988636					385	0	385	0.902439
386	0	386	0.758242	386	0.929688	386	1	386	1					386	0	386	0.875	386	0.988636					386	0	386	0.902439
387	0	387	0.758242	387	0.929688	387	1	387	1					387	0	387	0.875	387	0.988636					387	0	387	0.902439
388	0	388	0.758242	388	0.929688	388	1	388	1					388	0	388	0.875	388	0.988636					388	0	388	0.902439
389	0	389	0.758242	389	0.929688	389	1	389	1					389	0	389	0.875	389	0.988636					389	0	389	0.902439
390	0	390	0.769231	390	0.929688	390	1	390	1					390	0	390	0.875	390	0.988636					390	0	390	0.902439
391	0	391	0.769231	391	0.929688	391	1	391	1					391	0	391	0.875	391	0.988636					391	0	391	0.902439
392	0	392	0.769231	392	0.929688	392	1	392	1					392	0	392	0.875	392	0.988636					392	0	392	0.902439
393	0	393	0.769231	393	0.929688	393	1	393	1					393	0	393	0.875	393	0.988636					393	0	393	0.902439
394	0	394	0.769231	394	0.929688	394	1	394	1					394	0	394	0.875	394	0.988636					394	0	394	0.902439
395	0	395	0.769231	395	0.929688	395	1	395	1					395	0	395	0.875	395	0.988636					395	0	395	0.902439
396	0	396	0.769231	396	0.929688	396	1	396	1					396	0	396	0.875	396	0.988636					396	0	396	0.902439
397	0	397	0.769231	397	0.929688	397	1	397	1					397	0	397	0.875	397	0.988636					397	0	397	0.902439
398	0	398	0.78022	398	0.929688	398	1	398	1					398	0	398	0.875	398	0.988636					398	0	398	0.902439
399	0	399	0.78022	399	0.929688	399	1	399	1					399	0	399	0.875	399	0.988636					399	0	399	0.902439
400	0	400	0.78022	400	0.929688	400	1	400	1					400	0	400	0.875	400	0.988636
401	0	401	0.78022	401	0.929688	401	1	401	1					401	0	401	0.875	401	0.988636
402	0	402	0.78022	402	0.929688	402	1	402	1					402	0	402	0.875	402	0.988636
403	0	403	0.78022	403	0.929688	403	1	403	1					403	0	403	0.875	403	0.988636
404	0	404	0.78022	404	0.929688	404	1	404	1					404	0	404	0.875	404	0.988636
						405	1	405	1					405	0	405	0.875	405	0.988636
						406	1							406	0	406	0.875	406	0.988636
														407	0	407	0.875	407	0.988636
														408	0	408	0.875	408	0.988636
														409	0	409	0.875	409	0.988636
														410	0	410	0.875
														411	0	411	0.875
														412	0	412	0.875
														413	0	413	0.875
														414	0	414	0.875
														415	0	415	0.875
														416	0	416	0.875
														417	0	417	0.875
														418	0	418	0.875
														419	0	419	0.875
														420	0	420	0.875
														421	0	421	0.875
														422	0	422	0.875
														423	0	423	0.875
														424	0	424	0.875
														425	0	425	0.875
														426	0	426	0.875
														427	0	427	0.875
														428	0	428	0.875
														429	0	429	0.875
														430	0	430	0.875
														431	0	431	0.875
														432	0	432	0.875
														433	0	433	0.875
														434	0	434	0.875
														435	0	435	0.875
														436	0	436	0.875
														437	0	437	0.875
														438	0	438	0.875
														439	0	439	0.875

## Sheet: Figure 3E
Blunt seed mediated nucleation assay - power law analysis
Data set 1
Tubulin concentration (uM)	Rate of nucleation
1.4	0
2.45	0.0031
3.5	0.0102
5.25	0.0219
7	0.0329
8.75	0.0336
Data set 2
Tubulin concentration (uM)	Rate of nucleation
1.4	0
2.45	0.0057
3.5	0.0106
7	0.0299
Data set 3
Tubulin concentration (uM)	Rate of nucleation
1.4	0
2.45	0.0092
3.5	0.0165
7	0.0368

## Sheet: Fig 3-Supp 1C
Side-by-side comparison of gTuRC mediated versus spontaneous nucleation
Dataset 1								Dataset 2
gTuRC nucleation, 10.5uM tubulin			Spontaneous nucleation, 10.5uM tubulin					gTuRC nucleation, 10.5uM tubulin			Spontaneous nucleation, 10.5uM tubulin
Time (seconds)	Number of MTs		Time (seconds)	Number of MTs				Time (seconds)	Number of MTs		Time (seconds)	Number of MTs
0	0		0	0				0	0		0	0
1	0		1	0				1	0		1	0
2	1		2	0				2	0		2	0
3	1		3	0				3	0		3	0
4	1		4	0				4	0		4	0
5	1		5	0				5	0		5	0
6	1		6	0				6	0		6	0
7	1		7	0				7	0		7	0
8	1		8	0				8	0		8	0
9	1		9	0				9	0		9	0
10	1		10	0				10	0		10	0
11	1		11	0				11	0		11	0
12	1		12	0				12	0		12	0
13	1		13	0				13	0		13	0
14	1		14	0				14	0		14	0
15	1		15	0				15	0		15	0
16	1		16	0				16	0		16	0
17	1		17	0				17	0		17	0
18	1		18	0				18	0		18	0
19	2		19	0				19	0		19	0
20	2		20	0				20	1		20	0
21	2		21	0				21	1		21	0
22	2		22	0				22	1		22	0
23	2		23	0				23	2		23	0
24	3		24	0				24	2		24	0
25	3		25	0				25	2		25	0
26	3		26	0				26	2		26	0
27	3		27	0				27	3		27	0
28	3		28	0				28	3		28	0
29	3		29	0				29	3		29	0
30	3		30	0				30	4		30	0
31	3		31	0				31	5		31	0
32	3		32	0				32	5		32	0
33	3		33	0				33	6		33	0
34	4		34	0				34	7		34	0
35	5		35	0				35	7		35	0
36	5		36	0				36	8		36	0
37	6		37	0				37	8		37	0
38	6		38	0				38	9		38	0
39	7		39	0				39	9		39	0
40	7		40	0				40	10		40	0
41	11		41	0				41	10		41	0
42	12		42	0				42	10		42	0
43	12		43	0				43	10		43	0
44	13		44	0				44	10		44	0
45	13		45	0				45	10		45	0
46	13		46	0				46	10		46	0
47	13		47	0				47	11		47	0
48	14		48	0				48	11		48	0
49	14		49	0				49	11		49	0
50	15		50	0				50	11		50	0
51	15		51	0				51	11		51	0
52	15		52	0				52	11		52	0
53	15		53	0				53	11		53	0
54	15		54	0				54	11		54	0
55	16		55	0				55	12		55	0
56	16		56	0				56	12		56	0
57	16		57	0				57	12		57	0
58	16		58	0				58	12		58	0
59	16		59	0				59	13		59	0
60	16		60	0				60	13		60	0
61	17		61	0				61	13		61	0
62	17		62	0				62	14		62	0
63	18		63	0				63	14		63	0
64	18		64	0				64	14		64	0
65	19		65	1				65	14		65	0
66	19		66	1				66	15		66	0
67	19		67	1				67	15		67	0
68	19		68	1				68	15		68	0
69	21		69	1				69	15		69	0
70	21		70	1				70	16		70	0
71	21		71	1				71	16		71	0
72	22		72	1				72	16		72	0
73	24		73	1				73	17		73	0
74	24		74	1				74	18		74	0
75	25		75	1				75	18		75	0
76	25		76	1				76	19		76	0
77	25		77	1				77	19		77	0
78	26		78	1				78	19		78	0
79	27		79	1				79	19		79	0
80	27		80	1				80	19		80	0
81	27		81	1				81	19		81	0
82	28		82	1				82	20		82	0
83	28		83	1				83	20		83	0
84	28		84	1				84	21		84	0
85	28		85	1				85	21		85	0
86	30		86	1				86	21		86	0
87	30		87	1				87	21		87	0
88	30		88	1				88	21		88	0
89	30		89	1				89	21		89	0
90	31		90	1				90	23		90	0
91	32		91	1				91	23		91	0
92	33		92	1				92	24		92	0
93	33		93	1				93	24		93	0
94	34		94	1				94	25		94	0
95	34		95	1				95	25		95	0
96	34		96	1				96	25		96	0
97	34		97	1				97	25		97	0
98	35		98	1				98	25		98	0
99	35		99	1				99	25		99	0
100	36		100	1				100	25		100	0
101	36		101	1				101	25		101	0
102	37		102	1				102	25		102	0
103	37		103	1				103	25		103	0
104	39		104	1				104	25		104	0
105	39		105	1				105	25		105	0
106	39		106	1				106	25		106	0
107	39		107	1				107	25		107	0
108	39		108	1				108	26		108	0
109	39		109	1				109	26		109	0
110	41		110	1				110	26		110	0
111	42		111	1				111	27		111	0
112	44		112	1				112	27		112	0
113	45		113	1				113	27		113	0
114	46		114	1				114	28		114	0
115	46		115	1				115	28		115	0
116	47		116	1				116	29		116	0
117	47		117	1				117	29		117	0
118	47		118	1				118	30		118	0
119	47		119	1				119	30		119	0
120	47		120	1				120	31		120	0
121	48		121	1				121	31		121	0
122	48		122	1				122	32		122	0
123	49		123	1				123	32		123	0
124	49		124	1				124	32		124	0
125	49		125	1				125	32		125	0
126	49		126	1				126	33		126	0
127	52		127	1				127	33		127	0
128	52		128	1				128	33		128	0
129	52		129	1				129	33		129	0
130	53		130	1				130	34		130	0
131	54		131	1				131	34		131	0
132	56		132	1				132	35		132	0
133	57		133	1				133	35		133	0
134	58		134	1				134	35		134	0
135	58		135	1				135	35		135	0
136	59		136	1				136	35		136	0
137	61		137	1				137	35		137	0
138	64		138	1				138	35		138	0
139	65		139	1				139	35		139	0
140	66		140	1				140	37		140	0
141	66		141	1				141	37		141	0
142	67		142	1				142	38		142	0
143	67		143	1				143	38		143	0
144	67		144	1				144	38		144	0
145	68		145	1				145	38		145	0
146	69		146	1				146	38		146	0
147	69		147	1				147	38		147	0
148	70		148	1				148	38		148	0
149	70		149	1				149	38		149	0
150	70		150	1				150	39		150	0
151	71		151	1				151	40		151	0
152	72		152	1				152	40		152	0
153	72		153	1				153	40		153	0
154	72		154	1				154	41		154	0
155	73		155	1				155	41		155	0
156	74		156	1				156	41		156	0
157	76		157	1				157	41		157	0
158	77		158	1				158	41		158	0
159	80		159	1				159	41		159	0
160	82		160	1				160	41		160	0
161	83		161	1				161	41		161	0
162	83		162	1				162	43		162	0
163	84		163	1				163	43		163	0
164	84		164	1				164	43		164	0
165	86		165	1				165	44		165	0
166	88		166	1				166	44		166	0
167	89		167	1				167	44		167	0
168	90		168	1				168	45		168	0
169	91		169	1				169	45		169	0
170	91		170	1				170	46		170	0
171	91		171	1				171	46		171	0
172	91		172	1				172	47		172	0
173	92		173	1				173	47		173	0
174	92		174	1				174	50		174	0
175	92		175	1				175	50		175	0
176	92		176	1				176	50		176	0
177	93		177	1				177	50		177	0
178	96		178	1				178	51		178	0
179	97		179	1				179	51		179	0
180	99		180	1				180	51		180	0
181	99		181	1				181	51		181	0
182	100		182	1				182	51		182	0
183	102		183	1				183	51		183	0
184	102		184	1				184	51		184	0
185	102		185	1				185	51		185	0
186	103		186	1				186	51		186	0
187	104		187	1				187	51		187	0
188	104		188	1				188	52		188	0
189	105		189	1				189	52		189	0
190	105		190	1				190	54		190	0
191	105		191	1				191	54		191	0
192	105		192	1				192	56		192	0
193	105		193	1				193	56		193	0
194	106		194	1				194	57		194	0
195	107		195	1				195	57		195	0
196	107		196	1				196	57		196	0
197	107		197	1				197	57		197	0
198	108		198	1				198	57		198	0
199	109		199	1				199	57		199	0
200	110		200	1				200	57		200	0
201	111		201	1				201	57		201	0
202	111		202	1				202	57		202	0
203	112		203	1				203	57		203	0
204	112		204	1				204	57		204	0
205	112		205	1				205	57		205	0
206	113		206	1				206	57		206	0
207	113		207	1				207	57		207	0
208	116		208	1				208	57		208	0
209	116		209	1				209	57		209	0
210	116		210	1				210	57		210	0
211	116		211	1				211	57		211	0
212	119		212	1				212	57		212	0
213	120		213	1				213	57		213	0
214	120		214	1				214	57		214	0
215	121		215	1				215	57		215	0
216	122		216	1				216	57		216	0
217	122		217	1				217	57		217	0
218	122		218	1				218	58		218	0
219	123		219	1				219	58		219	0
220	125		220	1				220	60		220	0
221	126		221	1				221	60		221	0
222	129		222	1				222	60		222	0
223	129		223	1				223	60		223	0
224	130		224	1				224	60		224	0
225	131		225	1				225	60		225	0
226	131		226	1				226	60		226	0
227	132		227	1				227	60		227	0
228	132		228	1				228	62		228	0
229	133		229	1				229	62		229	0
230	135		230	1				230	63		230	0
231	135		231	1				231	63		231	0
232	136		232	1				232	64		232	0
233	138		233	1				233	64		233	0
234	138		234	1				234	64		234	0
235	138		235	1				235	64		235	0
236	139		236	1				236	65		236	0
237	140		237	1				237	65		237	0
238	140		238	1				238	66		238	0
239	141		239	1				239	66		239	0
240	142		240	1				240	66		240	0
241	142		241	1				241	68		241	0
242	142		242	1				242	68		242	0
243	142		243	1				243	68		243	0
244	143		244	1				244	68		244	0
245	144		245	1				245	68		245	0
246	144		246	1				246	68		246	0
247	144		247	1				247	68		247	0
248	146		248	1				248	68		248	0
249	147		249	1				249	68		249	0
250	148		250	1				250	68		250	0
251	148		251	1				251	68		251	0
252	148		252	1				252	69		252	0
253	148		253	1				253	69		253	0
254	148		254	1				254	69		254	0
255	150		255	1				255	69		255	0
256	151		256	1				256	69		256	0
257	152		257	1				257	69		257	0
258	152		258	1				258	69		258	0
259	152		259	1				259	69		259	0
260	153		260	1				260	69		260	0
261	155		261	1				261	69		261	0
262	155		262	1				262	69		262	0
263	155		263	1				263	69		263	0
264	156		264	1				264	69		264	0
265	156		265	1				265	69		265	0
266	156		266	1				266	69		266	0
267	156		267	1				267	69		267	0
268	156		268	1				268	71		268	0
269	158		269	1				269	71		269	0
270	158		270	1				270	71		270	0
271	160		271	1				271	71		271	0
272	160		272	1				272	72		272	0
273	161		273	1				273	72		273	0
274	162		274	1				274	73		274	0
275	163		275	1				275	73		275	0
276	163		276	1				276	73		276	0
277	163		277	1				277	73		277	0
278	164		278	1				278	73		278	0
279	164		279	1				279	73		279	0
280	164		280	1				280	73		280	0
281	165		281	1				281	73		281	0
282	168		282	1				282	73		282	0
283	169		283	1				283	73		283	0
284	172		284	1				284	73		284	0
285	172		285	1				285	73		285	0
286	172		286	1				286	73		286	0
287	172		287	1				287	73		287	0
288	174		288	1				288	73		288	0
289	174		289	1				289	73		289	0
290	174		290	1				290	73		290	0
291	175		291	1				291	73		291	0
292	175		292	1				292	74		292	0
293	176		293	1				293	74		293	0
294	176		294	1				294	74		294	0
295	176		295	1				295	74		295	0
296	179		296	1				296	74		296	0
297	179		297	1				297	74		297	0
298	179		298	1				298	74		298	0
299	180		299	1				299	74		299	0
300	181		300	1				300	74		300	0
301	181		301	1				301	74		301	0
302	182		302	1				302	75		302	0
303	183		303	1				303	75		303	0
304	183		304	1				304	75		304	0
305	184		305	1				305	75		305	0
306	184		306	1				306	76		306	0
307	188		307	1				307	76		307	0
308	189		308	1				308	77		308	0
309	190		309	1				309	77		309	0
310	190		310	1				310	77		310	0
311	192		311	1				311	77		311	0
312	192		312	1				312	77		312	0
313	193		313	1				313	77		313	0
314	193		314	1				314	77		314	0
315	194		315	1				315	77		315	0
316	194		316	1				316	77		316	0
317	194		317	1				317	77		317	0
318	194		318	1				318	77		318	0
319	195		319	1				319	77		319	0
320	196		320	1				320	77		320	0
321	196		321	1				321	77		321	0
322	197		322	1				322	77		322	0
323	197		323	1				323	77		323	0
324	199		324	1				324	77		324	0
325	200		325	1				325	77		325	0
326	204		326	1				326	78		326	0
327	204		327	1				327	78		327	0
328	204		328	1				328	79		328	0
329	205		329	1				329	79		329	0
330	205		330	1				330	79		330	0
331	205		331	1				331	79		331	0
332	206		332	1				332	79		332	0
333	207		333	1				333	79		333	0
334	207		334	1				334	79		334	0
335	207		335	1				335	79		335	0
336	207		336	1				336	79		336	0
337	208		337	1				337	79		337	0
338	209		338	1				338	79		338	0
339	209		339	1				339	79		339	0
340	209		340	1				340	79		340	0
341	210		341	1				341	79		341	0
342	210		342	1				342	79		342	0
343	210		343	1				343	79		343	0
344	210		344	1				344	79		344	0
345	211		345	1				345	79		345	0
346	211		346	1				346	79		346	0
347	211		347	1				347	79		347	0
348	213		348	1				348	79		348	0
349	214		349	1				349	79		349	0
350	215		350	1				350	79		350	0
351	216		351	1				351	79		351	0
352	217		352	1				352	80		352	0
353	217		353	1				353	80		353	0
354	218		354	1				354	80		354	0
355	218		355	1				355	80		355	0
356	218		356	1				356	80		356	0
357	219		357	1				357	80		357	0
358	220		358	1				358	80		358	0
359	220		359	1				359	80		359	0
360	220		360	1				360	80		360	0
361	220		361	1				361	80		361	0
362	220		362	1				362	80		362	0
363	220		363	1				363	80		363	0
364	220		364	1				364	80		364	0
365	220		365	1				365	80		365	0
366	221		366	1				366	81		366	0
367	222		367	1				367	81		367	0
368	222		368	1				368	82		368	0
369	223		369	1				369	82		369	0
370	224		370	1							370	0
371	224		371	1							371	0
372	224		372	1							372	0
373	224		373	1							373	0
374	224		374	1							374	0
375	224		375	1							375	0
376	225		376	1							376	0
377	225		377	1							377	0
378	225		378	1							378	0
379	225		379	1							379	0
380	225		380	1							380	0
381	225		381	1							381	0
382	226		382	1							382	0
383	226		383	1							383	0
384	226		384	1							384	0
385	226		385	1							385	0
386	226		386	1							386	0
387	226		387	1							387	0
388	229		388	1							388	0
389	230		389	1							389	0
390	230		390	1							390	0
391	230		391	1							391	0
392	230		392	1							392	0
393	231		393	1							393	0
394	231		394	1							394	0
395	232		395	1							395	0
396	232		396	1							396	0
397	232		397	1							397	0
398	232		398	1							398	0
399	233		399	1							399	0
400	233		400	1							400	0
401	233		401	1							401	0
402	233		402	1							402	0
403	233		403	1							403	0
404	233		404	1							404	0
405	233		405	1							405	0
406	233		406	1							406	0
407	233		407	1							407	0
408	233		408	1							408	0
409	233		409	1							409	0
410	233		410	1							410	0
411	234		411	1							411	0
412	234		412	1							412	0
413	234		413	1							413	0
414	234		414	1							414	0
415	234		415	1							415	0
416	234		416	1							416	0
417	234		417	1							417	0
418	234		418	1							418	0
419	234		419	1							419	0
420	235		420	1							420	0
421	235

## Sheet: Fig 3-Supp 1D
Growth speed data
g-TuRC nucleation assay			Blunt seed nucleation
Tubulin concentration (uM)	Growth speed (um/min)		Tubulin concentration (uM)	Growth speed (um/min)
7	1.29		2.45	0.1884
7	1.53		2.45	0.1386
7	0.63		2.45	0.1824
7	1.092		2.45	0.126
7	1.4502		2.45	0.132
7	1.2822		2.45	0.108
7	1.17		2.45	0.231
7	1.116		2.45	0.1578
7	1.152		2.45	0.1878
10.5	1.746		2.45	0.204
10.5	1.4328		2.45	0.144
10.5	1.926		2.45	0.258
10.5	1.878		2.45	0.1776
10.5	1.4832		2.45	0.3108
10.5	1.836		2.45	0.0966
10.5	1.8576		2.45	0.1626
10.5	1.7604		2.45	0.138
10.5	2.022		2.45	0.174
10.5	1.986		3.5	0.4824
10.5	1.998		3.5	0.5052
10.5	1.22196		3.5	0.4338
10.5	1.6542		3.5	0.3504
10.5	1.785		3.5	0.3708
10.5	1.962		3.5	0.4908
10.5	1.656		3.5	0.4554
10.5	1.866		3.5	0.3216
10.5	1.146		3.5	0.2646
10.5	2.166		3.5	0.39528
10.5	2.2008		3.5	0.417
10.5	1.554		3.5	0.3174
10.5	1.83		3.5	0.47196
10.5	1.3182		3.5	0.363
10.5	2.376		3.5	0.456
10.5	2.052		3.5	0.3882
10.5	1.9848		3.5	0.438
10.5	1.7502		3.5	0.3882
10.5	1.77396		3.5	0.4512
14	2.2788		3.5	0.41064
14	2.454		5.25	0.804
14	2.508		5.25	0.906
14	2.1762		5.25	0.612
14	2.8002		5.25	0.624
14	2.622		5.25	0.78
14	2.166		5.25	0.876
14	2.562		5.25	0.654
14	2.064		5.25	0.606
14	2.2398		5.25	0.654
14	2.838		5.25	0.84
14	2.436		5.25	0.717
14	2.73		5.25	0.8388
14	3.288		5.25	0.792
14	2.433		5.25	0.648
14	2.2068		5.25	0.882
14	2.16396		5.25	0.819
14	3.03		5.25	0.678
14	2.7276		5.25	0.738
14	2.5074		5.25	0.69
14	1.806		5.25	1.014
14	3.1536		5.25	0.8916
14	2.292		5.25	0.723
14	1.932		7	1.476
14	2.232		7	1.2282
14	2.526		7	1.2792
14	2.298		7	0.777
14	1.92		7	1.044
14	2.532		7	1.0146
14	2.1174		7	1.254
14	2.472		7	0.81
17.5	3.9228		7	1.248
17.5	2.691		7	1.206
17.5	3.234		7	1.158
17.5	3.132		7	1.134
17.5	3.0846		7	1.1712
17.5	2.892		7	0.966
17.5	3.276		7	1.008
17.5	2.934		7	1.242
17.5	3.15		7	0.978
17.5	3.9		7	1.0332
17.5	3.246		7	1.116
17.5	3.48		8.75	1.062
17.5	2.814		8.75	1.716
17.5	3.1134		8.75	1.1196
17.5	3.942		8.75	1.194
17.5	2.862		8.75	1.7988
17.5	3.72		8.75	1.608
17.5	3.222		8.75	1.518
21	3.027		8.75	1.452
21	3.702		8.75	1.752
21	4.5		8.75	1.68
21	3.6402		8.75	1.662
21	3.732		8.75	1.326
21	4.026		8.75	1.566
21	4.608		8.75	1.446
21	3.798		8.75	1.224
21	4.302		8.75	1.77
21	4.11		8.75	1.32
21	3.612		8.75	1.602
21	4.302		8.75	1.242
21	3.624		8.75	1.566
21	4.104		8.75	0.96
21	4.446		8.75	1.164
21	4.644
21	3.3666
21	3.924
21	4.1766
21	3.762
21	3.456
21	3.72
21	3.8862
21	4.176
21	4.059
21	4.008
21	3.642
21	3.888
21	3.9
21	3.93
21	4.56
21	3.681
