# Supplementary material for: The transition state and regulation of γ-TuRC-mediated microtubule nucleation revealed by single molecule microscopy
Source: eLife. 2020 Jun 15;9:e54253. doi: 10.7554/eLife.54253 (PMC7338055; doi:10.7554/eLife.54253)
Supplement: Figure 4—source data 1. [file elife-54253-fig4-data1.xlsx]

## Sheet: Figure 4D
Single molecule binding assay between gamma-tubulin and ab-tubulin
		Dataset 1								Dataset 2
Number of ab-tubulin molecules bound			Number of g-tubulin molecules bound					Number of ab-tubulin molecules bound			Number of g-tubulin molecules bound
592			31057.1					2702.5			22085.7
634			31528.6					2697.5			21614.3
656			31071.4					2832.5			22042.9
584			31071.4					2820			21071.4
638			31271.4					2767.5			22242.9
600			31314.3					2872.5			21614.3
570			31171.4					2830			21771.4
614			31257.1					2757.5			20557.1
604			31457.1					2777.5			21457.1
582			30971.4					2827.5			22014.3
616			30414.3					2767.5			21257.1
638			30957.1					2737.5			21714.3
632			30342.9					2672.5			20457.1
590			30314.3					2797.5			20857.1
628			30171.4					2735			21214.3
662			30342.9					2832.5			21457.1
656			30771.4					2762.5			20914.3
582			30485.7					2797.5			20900
686			30800					2755			21200
630			30542.9					2720			20814.3
674			30485.7					2770			21071.4
716			30771.4					2892.5			21242.9
672			29728.6					2847.5			20971.4
688			30571.4					2872.5			20942.9
702			30314.3					2817.5			21514.3
694			30128.6					2885			21314.3
664			29985.7					2830			21700
680			29671.4					2847.5			21728.6
