# Supplementary material for: The transition state and regulation of γ-TuRC-mediated microtubule nucleation revealed by single molecule microscopy
Source: eLife. 2020 Jun 15;9:e54253. doi: 10.7554/eLife.54253 (PMC7338055; doi:10.7554/eLife.54253)
Supplement: Figure 6—source data 1. [file elife-54253-fig6-data1.xlsx]

## Sheet: Figure 6B-D
gTuRC nucleation with putative activation factors
	Data-set 1							Data-set 2								Data-set 1							Data-set 2						Data-set 1						Data-set 2							Data-set 3
Control: gTuRC, - gTuNA		Experiment: gTuRC, + gTuNA					Control: gTuRC, - gTuNA		Experiment: gTuRC, + gTuNA					Control: gTuRC, - NME7		Experiment: gTuRC, + NME7					Control: gTuRC, - NME7		Experiment: gTuRC, + NME7					Control: gTuRC, - TPX2		Experiment: gTuRC, + TPX2				Control: gTuRC, - TPX2		Experiment: gTuRC, + TPX2					Control: gTuRC, - TPX2		Experiment: gTuRC, + TPX2
Time (seconds)	Normalized nucleation activity	Time (seconds)	Normalized nucleation activity				Time (seconds)	Normalized nucleation activity	Time (seconds)	Normalized nucleation activity				Time (seconds)	Normalized nucleation activity	Time (seconds)	Normalized nucleation activity				Time (seconds)	Normalized nucleation activity	Time (seconds)	Normalized nucleation activity				Time (seconds)	Normalized nucleation activity	Time (seconds)	Normalized nucleation activity			Time (seconds)	Normalized nucleation activity	Time (seconds)	Normalized nucleation activity				Time (seconds)	Normalized nucleation activity	Time (seconds)	Normalized nucleation activity
0	0	0	0				0	0	0	0.0555556				0	0	0	0				0	0	0	0				0	0	0	0			0	0	0	0				0	0	0	0
1	0	1	0				1	0	1	0.0555556				1	0	1	0				1	0	1	0				1	0	1	0			1	0	1	0				1	0	1	0
2	0	2	0				2	0	2	0.0555556				2	0	2	0				2	0	2	0				2	0	2	0			2	0	2	0				2	0	2	0
3	0	3	0				3	0	3	0.0555556				3	0	3	0				3	0	3	0				3	0	3	0			3	0	3	0				3	0	3	0
4	0	4	0				4	0	4	0.0555556				4	0	4	0				4	0	4	0				4	0	4	0			4	0	4	0				4	0	4	0
5	0	5	0				5	0	5	0.0555556				5	0	5	0				5	0	5	0				5	0	5	0			5	0	5	0				5	0	5	0
6	0	6	0				6	0	6	0.0555556				6	0	6	0				6	0	6	0				6	0	6	0			6	0	6	0				6	0	6	0
7	0	7	0				7	0	7	0.0555556				7	0	7	0				7	0	7	0				7	0	7	0			7	0	7	0				7	0	7	0
8	0	8	0				8	0	8	0.0555556				8	0	8	0				8	0	8	0				8	0	8	0			8	0	8	0				8	0	8	0
9	0	9	0				9	0	9	0.0555556				9	0	9	0				9	0	9	0				9	0	9	0			9	0	9	0				9	0	9	0
10	0	10	0				10	0	10	0.0555556				10	0	10	0				10	0	10	0				10	0	10	0			10	0	10	0				10	0	10	0
11	0	11	0				11	0	11	0.0555556				11	0	11	0				11	0	11	0				11	0	11	0			11	0	11	0				11	0	11	0
12	0	12	0				12	0	12	0.0555556				12	0	12	0				12	0	12	0				12	0	12	0			12	0	12	0				12	0	12	0
13	0	13	0.00862069				13	0	13	0.0555556				13	0	13	0				13	0	13	0				13	0	13	0			13	0	13	0				13	0	13	0
14	0	14	0.00862069				14	0	14	0.0555556				14	0	14	0				14	0	14	0				14	0	14	0			14	0	14	0				14	0	14	0.0263158
15	0	15	0.00862069				15	0	15	0.0555556				15	0	15	0				15	0	15	0				15	0	15	0			15	0.03125	15	0				15	0	15	0.0263158
16	0	16	0.0172414				16	0	16	0.0555556				16	0	16	0				16	0	16	0				16	0	16	0			16	0.03125	16	0				16	0	16	0.0263158
17	0	17	0.0172414				17	0	17	0.0555556				17	0	17	0				17	0	17	0				17	0	17	0.0243902			17	0.03125	17	0.03125				17	0	17	0.0263158
18	0	18	0.0258621				18	0	18	0.0555556				18	0	18	0				18	0	18	0				18	0.0243902	18	0.0243902			18	0.03125	18	0.03125				18	0	18	0.0263158
19	0	19	0.0258621				19	0	19	0.0555556				19	0	19	0				19	0	19	0				19	0.0243902	19	0.0243902			19	0.0625	19	0.03125				19	0	19	0.0526316
20	0	20	0.0344828				20	0	20	0.0555556				20	0	20	0				20	0	20	0				20	0.0243902	20	0.0487805			20	0.0625	20	0.03125				20	0	20	0.0526316
21	0	21	0.0344828				21	0	21	0.111111				21	0	21	0				21	0	21	0				21	0.0243902	21	0.0731707			21	0.0625	21	0.03125				21	0	21	0.0526316
22	0	22	0.0344828				22	0	22	0.111111				22	0	22	0				22	0	22	0				22	0.0243902	22	0.0731707			22	0.0625	22	0.0625				22	0	22	0.0526316
23	0	23	0.0431034				23	0	23	0.111111				23	0	23	0				23	0	23	0				23	0.0243902	23	0.0731707			23	0.0625	23	0.125				23	0	23	0.0526316
24	0	24	0.0517241				24	0	24	0.111111				24	0	24	0				24	0	24	0				24	0.0243902	24	0.0731707			24	0.09375	24	0.125				24	0.0526316	24	0.0526316
25	0	25	0.0689655				25	0	25	0.111111				25	0	25	0				25	0	25	0				25	0.0243902	25	0.0731707			25	0.09375	25	0.125				25	0.0526316	25	0.0526316
26	0	26	0.0689655				26	0	26	0.111111				26	0	26	0				26	0	26	0				26	0.0243902	26	0.0731707			26	0.09375	26	0.125				26	0.0526316	26	0.0526316
27	0	27	0.0689655				27	0	27	0.111111				27	0.00420168	27	0				27	0	27	0				27	0.0243902	27	0.0731707			27	0.09375	27	0.125				27	0.0526316	27	0.0526316
28	0	28	0.0689655				28	0	28	0.111111				28	0.00420168	28	0				28	0	28	0				28	0.0243902	28	0.097561			28	0.09375	28	0.125				28	0.0526316	28	0.0526316
29	0	29	0.0775862				29	0	29	0.111111				29	0.00420168	29	0				29	0	29	0				29	0.0243902	29	0.097561			29	0.125	29	0.15625				29	0.0526316	29	0.0526316
30	0.00862069	30	0.0775862				30	0	30	0.111111				30	0.00420168	30	0				30	0	30	0				30	0.0243902	30	0.097561			30	0.125	30	0.15625				30	0.0526316	30	0.0789474
31	0.00862069	31	0.0775862				31	0	31	0.111111				31	0.00420168	31	0				31	0	31	0				31	0.0243902	31	0.097561			31	0.125	31	0.1875				31	0.0526316	31	0.0789474
32	0.00862069	32	0.0775862				32	0	32	0.111111				32	0.00840336	32	0				32	0	32	0				32	0.0243902	32	0.097561			32	0.125	32	0.1875				32	0.0789474	32	0.0789474
33	0.00862069	33	0.0775862				33	0.0555556	33	0.111111				33	0.00840336	33	0				33	0	33	0				33	0.0487805	33	0.097561			33	0.125	33	0.1875				33	0.0789474	33	0.105263
34	0.00862069	34	0.0775862				34	0.0555556	34	0.111111				34	0.00840336	34	0				34	0	34	0.00390625				34	0.0487805	34	0.097561			34	0.125	34	0.1875				34	0.0789474	34	0.105263
35	0.00862069	35	0.0775862				35	0.0555556	35	0.111111				35	0.00840336	35	0				35	0	35	0.00390625				35	0.0487805	35	0.097561			35	0.125	35	0.21875				35	0.105263	35	0.105263
36	0.00862069	36	0.0862069				36	0.0555556	36	0.111111				36	0.00840336	36	0.00840336				36	0	36	0.00390625				36	0.0487805	36	0.146341			36	0.125	36	0.21875				36	0.105263	36	0.105263
37	0.00862069	37	0.103448				37	0.0555556	37	0.111111				37	0.00840336	37	0.012605				37	0	37	0.00390625				37	0.097561	37	0.170732			37	0.125	37	0.21875				37	0.105263	37	0.105263
38	0.00862069	38	0.103448				38	0.0555556	38	0.111111				38	0.00840336	38	0.012605				38	0	38	0.00390625				38	0.097561	38	0.170732			38	0.125	38	0.21875				38	0.105263	38	0.131579
39	0.00862069	39	0.112069				39	0.0555556	39	0.111111				39	0.00840336	39	0.012605				39	0	39	0.00390625				39	0.097561	39	0.170732			39	0.15625	39	0.21875				39	0.105263	39	0.131579
40	0.00862069	40	0.112069				40	0.0555556	40	0.166667				40	0.00840336	40	0.012605				40	0	40	0.00390625				40	0.097561	40	0.170732			40	0.15625	40	0.21875				40	0.105263	40	0.157895
41	0.0258621	41	0.12931				41	0.0555556	41	0.166667				41	0.00840336	41	0.012605				41	0	41	0.00390625				41	0.121951	41	0.195122			41	0.15625	41	0.25				41	0.105263	41	0.184211
42	0.0258621	42	0.12931				42	0.0555556	42	0.166667				42	0.00840336	42	0.012605				42	0	42	0.00390625				42	0.146341	42	0.219512			42	0.15625	42	0.25				42	0.105263	42	0.236842
43	0.0344828	43	0.155172				43	0.0555556	43	0.166667				43	0.012605	43	0.0168067				43	0.00390625	43	0.00390625				43	0.146341	43	0.219512			43	0.1875	43	0.28125				43	0.131579	43	0.236842
44	0.0344828	44	0.155172				44	0.111111	44	0.166667				44	0.012605	44	0.0210084				44	0.00390625	44	0.00390625				44	0.146341	44	0.243902			44	0.1875	44	0.34375				44	0.157895	44	0.236842
45	0.0344828	45	0.155172				45	0.111111	45	0.166667				45	0.012605	45	0.0336134				45	0.00390625	45	0.00390625				45	0.146341	45	0.268293			45	0.1875	45	0.34375				45	0.184211	45	0.236842
46	0.0344828	46	0.172414				46	0.111111	46	0.166667				46	0.0168067	46	0.0336134				46	0.00390625	46	0.00390625				46	0.170732	46	0.268293			46	0.21875	46	0.34375				46	0.184211	46	0.236842
47	0.0431034	47	0.181034				47	0.111111	47	0.166667				47	0.0168067	47	0.0420168				47	0.00390625	47	0.00390625				47	0.170732	47	0.268293			47	0.21875	47	0.34375				47	0.210526	47	0.263158
48	0.0517241	48	0.181034				48	0.111111	48	0.166667				48	0.0210084	48	0.0462185				48	0.00390625	48	0.00390625				48	0.170732	48	0.292683			48	0.21875	48	0.34375				48	0.210526	48	0.263158
49	0.0517241	49	0.181034				49	0.111111	49	0.166667				49	0.0252101	49	0.0462185				49	0.00390625	49	0.0078125				49	0.170732	49	0.292683			49	0.21875	49	0.34375				49	0.210526	49	0.289474
50	0.0603448	50	0.198276				50	0.111111	50	0.166667				50	0.0252101	50	0.0504202				50	0.0078125	50	0.0078125				50	0.170732	50	0.292683			50	0.25	50	0.34375				50	0.236842	50	0.289474
51	0.0775862	51	0.206897				51	0.111111	51	0.166667				51	0.0252101	51	0.0630252				51	0.0078125	51	0.0078125				51	0.195122	51	0.317073			51	0.25	51	0.34375				51	0.236842	51	0.315789
52	0.0948276	52	0.206897				52	0.111111	52	0.222222				52	0.0252101	52	0.0714286				52	0.0078125	52	0.0078125				52	0.195122	52	0.390244			52	0.25	52	0.34375				52	0.236842	52	0.342105
53	0.0948276	53	0.224138				53	0.111111	53	0.222222				53	0.0252101	53	0.0714286				53	0.0078125	53	0.0078125				53	0.195122	53	0.390244			53	0.25	53	0.375				53	0.236842	53	0.342105
54	0.103448	54	0.25				54	0.111111	54	0.222222				54	0.0252101	54	0.0756303				54	0.0078125	54	0.0078125				54	0.195122	54	0.390244			54	0.25	54	0.375				54	0.236842	54	0.342105
55	0.12069	55	0.25				55	0.111111	55	0.222222				55	0.0252101	55	0.0798319				55	0.0078125	55	0.0078125				55	0.195122	55	0.390244			55	0.25	55	0.375				55	0.236842	55	0.368421
56	0.137931	56	0.25				56	0.111111	56	0.222222				56	0.0378151	56	0.0798319				56	0.0078125	56	0.0078125				56	0.195122	56	0.439024			56	0.25	56	0.375				56	0.263158	56	0.368421
57	0.137931	57	0.25				57	0.111111	57	0.277778				57	0.0420168	57	0.0840336				57	0.0078125	57	0.0078125				57	0.195122	57	0.439024			57	0.28125	57	0.375				57	0.289474	57	0.368421
58	0.137931	58	0.25				58	0.111111	58	0.277778				58	0.0462185	58	0.0882353				58	0.0078125	58	0.0117188				58	0.195122	58	0.439024			58	0.28125	58	0.375				58	0.289474	58	0.368421
59	0.172414	59	0.258621				59	0.111111	59	0.277778				59	0.0546218	59	0.10084				59	0.015625	59	0.0117188				59	0.219512	59	0.439024			59	0.28125	59	0.375				59	0.315789	59	0.368421
60	0.172414	60	0.267241				60	0.166667	60	0.277778				60	0.0588235	60	0.105042				60	0.0234375	60	0.0195312				60	0.219512	60	0.439024			60	0.28125	60	0.375				60	0.315789	60	0.421053
61	0.172414	61	0.267241				61	0.166667	61	0.277778				61	0.0630252	61	0.105042				61	0.0273438	61	0.0195312				61	0.219512	61	0.439024			61	0.28125	61	0.375				61	0.315789	61	0.447368
62	0.181034	62	0.267241				62	0.166667	62	0.277778				62	0.0672269	62	0.109244				62	0.03125	62	0.0195312				62	0.219512	62	0.439024			62	0.3125	62	0.375				62	0.315789	62	0.447368
63	0.181034	63	0.275862				63	0.166667	63	0.277778				63	0.0798319	63	0.113445				63	0.0390625	63	0.0195312				63	0.243902	63	0.439024			63	0.3125	63	0.375				63	0.342105	63	0.447368
64	0.181034	64	0.284483				64	0.166667	64	0.277778				64	0.0840336	64	0.134454				64	0.0390625	64	0.0195312				64	0.243902	64	0.439024			64	0.34375	64	0.375				64	0.342105	64	0.447368
65	0.189655	65	0.293103				65	0.166667	65	0.277778				65	0.0882353	65	0.147059				65	0.0507812	65	0.0195312				65	0.243902	65	0.463415			65	0.34375	65	0.375				65	0.368421	65	0.447368
66	0.189655	66	0.293103				66	0.166667	66	0.277778				66	0.092437	66	0.151261				66	0.0546875	66	0.0195312				66	0.268293	66	0.487805			66	0.34375	66	0.40625				66	0.368421	66	0.473684
67	0.189655	67	0.318966				67	0.166667	67	0.277778				67	0.092437	67	0.159664				67	0.0625	67	0.0234375				67	0.268293	67	0.487805			67	0.34375	67	0.40625				67	0.368421	67	0.5
68	0.189655	68	0.327586				68	0.166667	68	0.277778				68	0.105042	68	0.163866				68	0.0664062	68	0.0273438				68	0.268293	68	0.487805			68	0.375	68	0.40625				68	0.368421	68	0.552632
69	0.189655	69	0.336207				69	0.166667	69	0.277778				69	0.105042	69	0.176471				69	0.0742188	69	0.0273438				69	0.268293	69	0.487805			69	0.375	69	0.40625				69	0.368421	69	0.552632
70	0.198276	70	0.336207				70	0.166667	70	0.277778				70	0.105042	70	0.176471				70	0.0820312	70	0.0273438				70	0.317073	70	0.487805			70	0.375	70	0.4375				70	0.368421	70	0.552632
71	0.206897	71	0.344828				71	0.166667	71	0.333333				71	0.113445	71	0.180672				71	0.101562	71	0.0273438				71	0.317073	71	0.512195			71	0.375	71	0.4375				71	0.368421	71	0.552632
72	0.224138	72	0.344828				72	0.166667	72	0.333333				72	0.121849	72	0.180672				72	0.109375	72	0.0351562				72	0.341463	72	0.512195			72	0.375	72	0.4375				72	0.368421	72	0.552632
73	0.232759	73	0.353448				73	0.166667	73	0.333333				73	0.130252	73	0.201681				73	0.117188	73	0.0390625				73	0.341463	73	0.536585			73	0.375	73	0.4375				73	0.368421	73	0.552632
74	0.232759	74	0.362069				74	0.166667	74	0.333333				74	0.134454	74	0.201681				74	0.121094	74	0.0390625				74	0.341463	74	0.536585			74	0.375	74	0.4375				74	0.368421	74	0.552632
75	0.232759	75	0.37069				75	0.166667	75	0.333333				75	0.138655	75	0.210084				75	0.132812	75	0.0390625				75	0.341463	75	0.536585			75	0.375	75	0.4375				75	0.394737	75	0.578947
76	0.232759	76	0.37069				76	0.166667	76	0.333333				76	0.138655	76	0.210084				76	0.144531	76	0.0429688				76	0.341463	76	0.560976			76	0.40625	76	0.4375				76	0.394737	76	0.578947
77	0.25	77	0.37069				77	0.222222	77	0.333333				77	0.138655	77	0.222689				77	0.148438	77	0.046875				77	0.341463	77	0.560976			77	0.4375	77	0.46875				77	0.394737	77	0.578947
78	0.25	78	0.37069				78	0.222222	78	0.388889				78	0.138655	78	0.226891				78	0.160156	78	0.0507812				78	0.341463	78	0.585366			78	0.4375	78	0.46875				78	0.421053	78	0.605263
79	0.258621	79	0.396552				79	0.222222	79	0.388889				79	0.147059	79	0.235294				79	0.167969	79	0.0507812				79	0.414634	79	0.585366			79	0.4375	79	0.46875				79	0.447368	79	0.605263
80	0.267241	80	0.448276				80	0.222222	80	0.388889				80	0.163866	80	0.235294				80	0.183594	80	0.0507812				80	0.439024	80	0.585366			80	0.4375	80	0.46875				80	0.473684	80	0.605263
81	0.275862	81	0.456897				81	0.222222	81	0.388889				81	0.172269	81	0.243697				81	0.210938	81	0.0546875				81	0.439024	81	0.585366			81	0.4375	81	0.5				81	0.473684	81	0.631579
82	0.284483	82	0.482759				82	0.222222	82	0.388889				82	0.176471	82	0.252101				82	0.222656	82	0.0546875				82	0.439024	82	0.609756			82	0.4375	82	0.5				82	0.473684	82	0.657895
83	0.310345	83	0.482759				83	0.277778	83	0.388889				83	0.184874	83	0.260504				83	0.246094	83	0.0546875				83	0.439024	83	0.634146			83	0.4375	83	0.5				83	0.473684	83	0.684211
84	0.310345	84	0.517241				84	0.277778	84	0.388889				84	0.184874	84	0.268908				84	0.253906	84	0.0585938				84	0.439024	84	0.634146			84	0.46875	84	0.5				84	0.473684	84	0.684211
85	0.318966	85	0.525862				85	0.277778	85	0.388889				85	0.193277	85	0.277311				85	0.277344	85	0.0625				85	0.439024	85	0.634146			85	0.5	85	0.5				85	0.473684	85	0.684211
86	0.336207	86	0.551724				86	0.277778	86	0.388889				86	0.197479	86	0.277311				86	0.285156	86	0.0664062				86	0.439024	86	0.634146			86	0.5	86	0.5				86	0.5	86	0.710526
87	0.344828	87	0.551724				87	0.277778	87	0.388889				87	0.201681	87	0.294118				87	0.296875	87	0.0703125				87	0.463415	87	0.634146			87	0.5	87	0.5				87	0.5	87	0.710526
88	0.353448	88	0.551724				88	0.277778	88	0.388889				88	0.205882	88	0.294118				88	0.3125	88	0.078125				88	0.487805	88	0.634146			88	0.5	88	0.5				88	0.526316	88	0.736842
89	0.362069	89	0.551724				89	0.277778	89	0.444444				89	0.218487	89	0.315126				89	0.335938	89	0.078125				89	0.487805	89	0.634146			89	0.5	89	0.53125				89	0.526316	89	0.736842
90	0.362069	90	0.551724				90	0.277778	90	0.444444				90	0.222689	90	0.323529				90	0.359375	90	0.0859375				90	0.487805	90	0.634146			90	0.5	90	0.53125				90	0.526316	90	0.763158
91	0.387931	91	0.560345				91	0.277778	91	0.444444				91	0.222689	91	0.336134				91	0.382812	91	0.09375				91	0.512195	91	0.658537			91	0.5	91	0.53125				91	0.526316	91	0.789474
92	0.387931	92	0.568966				92	0.277778	92	0.5				92	0.239496	92	0.336134				92	0.382812	92	0.0976562				92	0.512195	92	0.707317			92	0.5	92	0.5625				92	0.526316	92	0.789474
93	0.387931	93	0.568966				93	0.277778	93	0.5				93	0.260504	93	0.340336				93	0.414062	93	0.113281				93	0.536585	93	0.707317			93	0.5	93	0.5625				93	0.526316	93	0.842105
94	0.405172	94	0.62069				94	0.333333	94	0.5				94	0.273109	94	0.352941				94	0.441406	94	0.121094				94	0.536585	94	0.731707			94	0.53125	94	0.5625				94	0.526316	94	0.842105
95	0.405172	95	0.62069				95	0.388889	95	0.5				95	0.277311	95	0.357143				95	0.464844	95	0.132812				95	0.585366	95	0.756098			95	0.53125	95	0.59375				95	0.552632	95	0.868421
96	0.405172	96	0.62931				96	0.388889	96	0.611111				96	0.289916	96	0.37395				96	0.484375	96	0.136719				96	0.585366	96	0.780488			96	0.53125	96	0.59375				96	0.552632	96	0.868421
97	0.405172	97	0.62931				97	0.388889	97	0.611111				97	0.298319	97	0.394958				97	0.523438	97	0.136719				97	0.585366	97	0.780488			97	0.53125	97	0.59375				97	0.552632	97	0.894737
98	0.405172	98	0.637931				98	0.388889	98	0.666667				98	0.310924	98	0.39916				98	0.542969	98	0.152344				98	0.585366	98	0.780488			98	0.53125	98	0.59375				98	0.605263	98	0.894737
99	0.413793	99	0.637931				99	0.388889	99	0.666667				99	0.315126	99	0.415966				99	0.578125	99	0.152344				99	0.585366	99	0.780488			99	0.53125	99	0.59375				99	0.605263	99	0.894737
100	0.422414	100	0.646552				100	0.388889	100	0.666667				100	0.331933	100	0.415966				100	0.605469	100	0.15625				100	0.585366	100	0.780488			100	0.53125	100	0.59375				100	0.605263	100	0.894737
101	0.422414	101	0.655172				101	0.388889	101	0.666667				101	0.348739	101	0.432773				101	0.625	101	0.167969				101	0.585366	101	0.780488			101	0.53125	101	0.59375				101	0.605263	101	0.894737
102	0.431034	102	0.672414				102	0.388889	102	0.666667				102	0.365546	102	0.445378				102	0.644531	102	0.171875				102	0.609756	102	0.804878			102	0.5625	102	0.59375				102	0.605263	102	0.894737
103	0.439655	103	0.672414				103	0.388889	103	0.666667				103	0.378151	103	0.462185				103	0.652344	103	0.183594				103	0.609756	103	0.829268			103	0.59375	103	0.59375				103	0.631579	103	0.894737
104	0.439655	104	0.689655				104	0.388889	104	0.666667				104	0.382353	104	0.470588				104	0.671875	104	0.1875				104	0.609756	104	0.829268			104	0.625	104	0.59375				104	0.631579	104	0.894737
105	0.439655	105	0.689655				105	0.5	105	0.722222				105	0.386555	105	0.483193				105	0.691406	105	0.199219				105	0.609756	105	0.829268			105	0.65625	105	0.59375				105	0.631579	105	0.894737
106	0.439655	106	0.689655				106	0.5	106	0.722222				106	0.394958	106	0.491597				106	0.695312	106	0.207031				106	0.634146	106	0.853659			106	0.6875	106	0.59375				106	0.631579	106	0.921053
107	0.439655	107	0.698276				107	0.5	107	0.722222				107	0.403361	107	0.5				107	0.71875	107	0.222656				107	0.634146	107	0.853659			107	0.6875	107	0.59375				107	0.631579	107	0.921053
108	0.439655	108	0.706897				108	0.5	108	0.722222				108	0.42437	108	0.504202				108	0.730469	108	0.226562				108	0.634146	108	0.878049			108	0.71875	108	0.59375				108	0.631579	108	1
109	0.439655	109	0.715517				109	0.5	109	0.722222				109	0.432773	109	0.508403				109	0.742188	109	0.234375				109	0.658537	109	0.878049			109	0.75	109	0.59375				109	0.657895	109	1.02632
110	0.456897	110	0.741379				110	0.5	110	0.722222				110	0.457983	110	0.512605				110	0.75	110	0.238281				110	0.658537	110	0.902439			110	0.78125	110	0.71875				110	0.684211	110	1.02632
111	0.456897	111	0.741379				111	0.5	111	0.722222				111	0.47479	111	0.521008				111	0.761719	111	0.246094				111	0.658537	111	0.902439			111	0.78125	111	0.78125				111	0.710526	111	1.02632
112	0.456897	112	0.741379				112	0.5	112	0.722222				112	0.508403	112	0.542017				112	0.761719	112	0.25				112	0.682927	112	0.902439			112	0.78125	112	0.78125				112	0.710526	112	1.05263
113	0.456897	113	0.741379				113	0.5	113	0.722222				113	0.52521	113	0.558824				113	0.777344	113	0.253906				113	0.707317	113	0.902439			113	0.78125	113	0.78125				113	0.710526	113	1.05263
114	0.456897	114	0.741379				114	0.5	114	0.722222				114	0.55042	114	0.563025				114	0.785156	114	0.265625				114	0.707317	114	0.902439			114	0.78125	114	0.78125				114	0.710526	114	1.05263
115	0.456897	115	0.75				115	0.5	115	0.722222				115	0.558824	115	0.571429				115	0.792969	115	0.269531				115	0.731707	115	0.902439			115	0.78125	115	0.78125				115	0.710526	115	1.07895
116	0.465517	116	0.75				116	0.5	116	0.722222				116	0.571429	116	0.584034				116	0.796875	116	0.28125				116	0.731707	116	0.926829			116	0.8125	116	0.78125				116	0.736842	116	1.07895
117	0.465517	117	0.75				117	0.5	117	0.722222				117	0.588235	117	0.584034				117	0.808594	117	0.289062				117	0.731707	117	0.926829			117	0.8125	117	0.78125				117	0.736842	117	1.07895
118	0.465517	118	0.767241				118	0.5	118	0.722222				118	0.588235	118	0.584034				118	0.8125	118	0.300781				118	0.731707	118	0.97561			118	0.8125	118	0.78125				118	0.736842	118	1.07895
119	0.491379	119	0.767241				119	0.5	119	0.722222				119	0.592437	119	0.588235				119	0.8125	119	0.304688				119	0.756098	119	0.97561			119	0.8125	119	0.78125				119	0.736842	119	1.07895
120	0.534483	120	0.793103				120	0.5	120	0.722222				120	0.60084	120	0.613445				120	0.828125	120	0.3125				120	0.780488	120	0.97561			120	0.8125	120	0.875				120	0.736842	120	1.10526
121	0.534483	121	0.793103				121	0.5	121	0.722222				121	0.617647	121	0.613445				121	0.835938	121	0.320312				121	0.780488	121	0.97561			121	0.84375	121	0.875				121	0.736842	121	1.10526
122	0.543103	122	0.810345				122	0.5	122	0.722222				122	0.634454	122	0.634454				122	0.84375	122	0.332031				122	0.780488	122	1			122	0.84375	122	0.875				122	0.763158	122	1.10526
123	0.543103	123	0.810345				123	0.5	123	0.722222				123	0.651261	123	0.634454				123	0.855469	123	0.34375				123	0.780488	123	1			123	0.84375	123	0.875				123	0.763158	123	1.10526
124	0.551724	124	0.818966				124	0.5	124	0.722222				124	0.668067	124	0.655462				124	0.855469	124	0.347656				124	0.804878	124	1			124	0.84375	124	0.9375				124	0.789474	124	1.13158
125	0.551724	125	0.818966				125	0.5	125	0.722222				125	0.684874	125	0.655462				125	0.859375	125	0.363281				125	0.804878	125	1			125	0.84375	125	0.9375				125	0.789474	125	1.18421
126	0.568966	126	0.836207				126	0.5	126	0.722222				126	0.705882	126	0.668067				126	0.867188	126	0.378906				126	0.829268	126	1			126	0.84375	126	0.96875				126	0.815789	126	1.18421
127	0.568966	127	0.836207				127	0.5	127	0.722222				127	0.714286	127	0.672269				127	0.878906	127	0.390625				127	0.829268	127	1			127	0.84375	127	0.96875				127	0.815789	127	1.18421
128	0.568966	128	0.862069				128	0.5	128	0.777778				128	0.722689	128	0.693277				128	0.902344	128	0.398438				128	0.878049	128	1			128	0.84375	128	1				128	0.815789	128	1.26316
129	0.568966	129	0.862069				129	0.5	129	0.777778				129	0.735294	129	0.693277				129	0.914062	129	0.417969				129	0.878049	129	1			129	0.84375	129	1				129	0.815789	129	1.28947
130	0.586207	130	0.87931				130	0.5	130	0.777778				130	0.735294	130	0.710084				130	0.921875	130	0.429688				130	0.878049	130	1			130	0.84375	130	1				130	0.815789	130	1.28947
131	0.586207	131	0.87931				131	0.5	131	0.833333				131	0.752101	131	0.710084				131	0.929688	131	0.445312				131	0.878049	131	1			131	0.875	131	1				131	0.868421	131	1.31579
132	0.612069	132	0.887931				132	0.5	132	0.833333				132	0.760504	132	0.718487				132	0.929688	132	0.453125				132	0.902439	132	1			132	0.875	132	1.0625				132	0.868421	132	1.31579
133	0.62069	133	0.887931				133	0.5	133	0.833333				133	0.781513	133	0.718487				133	0.9375	133	0.464844				133	0.902439	133	1			133	0.875	133	1.0625				133	0.868421	133	1.31579
134	0.62931	134	0.922414				134	0.5	134	0.833333				134	0.789916	134	0.735294				134	0.941406	134	0.480469				134	0.902439	134	1.02439			134	0.875	134	1.125				134	0.894737	134	1.31579
135	0.637931	135	0.931034				135	0.5	135	0.833333				135	0.810924	135	0.739496				135	0.941406	135	0.496094				135	0.902439	135	1.02439			135	0.875	135	1.15625				135	0.894737	135	1.31579
136	0.672414	136	0.948276				136	0.5	136	0.888889				136	0.823529	136	0.768908				136	0.949219	136	0.503906				136	0.902439	136	1.04878			136	0.90625	136	1.15625				136	0.894737	136	1.31579
137	0.672414	137	0.956897				137	0.5	137	0.888889				137	0.827731	137	0.768908				137	0.949219	137	0.523438				137	0.902439	137	1.04878			137	0.90625	137	1.15625				137	0.921053	137	1.31579
138	0.698276	138	0.965517				138	0.5	138	0.888889				138	0.840336	138	0.777311				138	0.953125	138	0.535156				138	0.95122	138	1.04878			138	0.90625	138	1.15625				138	0.947368	138	1.31579
139	0.698276	139	0.965517				139	0.5	139	0.888889				139	0.844538	139	0.781513				139	0.953125	139	0.535156				139	0.95122	139	1.04878			139	0.90625	139	1.15625				139	0.947368	139	1.34211
140	0.698276	140	0.982759				140	0.555556	140	0.888889				140	0.882353	140	0.798319				140	0.957031	140	0.539062				140	0.95122	140	1.04878			140	0.90625	140	1.1875				140	0.947368	140	1.39474
141	0.698276	141	0.991379				141	0.555556	141	0.888889				141	0.886555	141	0.802521				141	0.960938	141	0.539062				141	0.95122	141	1.04878			141	0.90625	141	1.1875				141	0.947368	141	1.42105
142	0.724138	142	1.00862				142	0.555556	142	0.888889				142	0.907563	142	0.819328				142	0.96875	142	0.542969				142	0.97561	142	1.07317			142	0.90625	142	1.21875				142	0.947368	142	1.5
143	0.724138	143	1.00862				143	0.555556	143	0.888889				143	0.907563	143	0.819328				143	0.972656	143	0.558594				143	0.97561	143	1.07317			143	0.90625	143	1.21875				143	0.947368	143	1.52632
144	0.724138	144	1.01724				144	0.555556	144	0.888889				144	0.928571	144	0.840336				144	0.976562	144	0.574219				144	0.97561	144	1.07317			144	0.9375	144	1.21875				144	0.947368	144	1.52632
145	0.724138	145	1.01724				145	0.555556	145	0.888889				145	0.932773	145	0.840336				145	0.984375	145	0.582031				145	0.97561	145	1.07317			145	0.9375	145	1.21875				145	0.947368	145	1.52632
146	0.724138	146	1.03448				146	0.555556	146	0.888889				146	0.962185	146	0.869748				146	0.992188	146	0.582031				146	0.97561	146	1.07317			146	0.96875	146	1.21875				146	1	146	1.55263
147	0.724138	147	1.03448				147	0.555556	147	0.944444				147	0.962185	147	0.869748				147	0.996094	147	0.597656				147	0.97561	147	1.07317			147	0.96875	147	1.21875				147	1	147	1.55263
148	0.732759	148	1.06034				148	0.555556	148	0.944444				148	0.983193	148	0.87395				148	0.996094	148	0.628906				148	1	148	1.07317			148	1	148	1.21875				148	1	148	1.55263
149	0.732759	149	1.06034				149	0.555556	149	0.944444				149	0.983193	149	0.87395				149	1	149	0.632812				149	1	149	1.07317			149	1	149	1.21875				149	1	149	1.55263
150	0.732759	150	1.07759				150	0.555556	150	0.944444				150	1	150	0.894958				150	1	150	0.636719				150	1	150	1.07317			150	1	150	1.21875				150	1	150	1.57895
151	0.732759	151	1.07759				151	0.555556	151	0.944444				151	1	151	0.894958				151	1.00391	151	0.648438				151	1	151	1.07317			151	1	151	1.25				151	1	151	1.57895
152	0.741379	152	1.08621				152	0.611111	152	0.944444				152	1.01261	152	0.915966				152	1.01562	152	0.664062				152	1.02439	152	1.07317			152	1.03125	152	1.25				152	1.02632	152	1.60526
153	0.741379	153	1.08621				153	0.611111	153	0.944444				153	1.01261	153	0.915966				153	1.01953	153	0.667969				153	1.02439	153	1.07317			153	1.03125	153	1.25				153	1.05263	153	1.60526
154	0.741379	154	1.08621				154	0.611111	154	0.944444				154	1.03361	154	0.936975				154	1.02344	154	0.675781				154	1.04878	154	1.09756			154	1.03125	154	1.28125				154	1.05263	154	1.60526
155	0.741379	155	1.08621				155	0.611111	155	1				155	1.03361	155	0.936975				155	1.02734	155	0.691406				155	1.04878	155	1.09756			155	1.03125	155	1.28125				155	1.05263	155	1.60526
156	0.741379	156	1.10345				156	0.611111	156	1				156	1.04202	156	0.94958				156	1.03516	156	0.699219				156	1.07317	156	1.09756			156	1.03125	156	1.28125				156	1.07895	156	1.63158
157	0.741379	157	1.10345				157	0.611111	157	1				157	1.04202	157	0.94958				157	1.03516	157	0.71875				157	1.07317	157	1.09756			157	1.03125	157	1.28125				157	1.07895	157	1.65789
158	0.741379	158	1.10345				158	0.611111	158	1				158	1.05462	158	0.962185				158	1.03516	158	0.742188				158	1.09756	158	1.09756			158	1.03125	158	1.3125				158	1.07895	158	1.71053
159	0.741379	159	1.10345				159	0.611111	159	1				159	1.05462	159	0.962185				159	1.04297	159	0.75				159	1.09756	159	1.09756			159	1.03125	159	1.3125				159	1.10526	159	1.71053
160	0.767241	160	1.12931				160	0.611111	160	1				160	1.07563	160	0.970588				160	1.04297	160	0.761719				160	1.14634	160	1.09756			160	1.03125	160	1.3125				160	1.10526	160	1.73684
161	0.767241	161	1.12931				161	0.611111	161	1				161	1.07563	161	0.970588				161	1.04297	161	0.765625				161	1.14634	161	1.09756			161	1.03125	161	1.3125				161	1.10526	161	1.73684
162	0.775862	162	1.15517				162	0.611111	162	1				162	1.08824	162	0.983193				162	1.04688	162	0.777344				162	1.14634	162	1.09756			162	1.0625	162	1.34375				162	1.10526	162	1.76316
163	0.775862	163	1.16379				163	0.611111	163	1				163	1.08824	163	0.983193				163	1.04688	163	0.796875				163	1.14634	163	1.09756			163	1.0625	163	1.34375				163	1.10526	163	1.78947
164	0.784483	164	1.16379				164	0.611111	164	1				164	1.09664	164	0.987395				164	1.04688	164	0.808594				164	1.17073	164	1.09756			164	1.0625	164	1.34375				164	1.13158	164	1.84211
165	0.784483	165	1.17241				165	0.611111	165	1				165	1.09664	165	0.987395				165	1.04688	165	0.84375				165	1.17073	165	1.09756			165	1.0625	165	1.34375				165	1.13158	165	1.84211
166	0.784483	166	1.18966				166	0.611111	166	1.05556				166	1.10924	166	1				166	1.04688	166	0.855469				166	1.17073	166	1.09756			166	1.0625	166	1.34375				166	1.13158	166	1.84211
167	0.784483	167	1.18966				167	0.611111	167	1.05556				167	1.11345	167	1				167	1.04688	167	0.875				167	1.17073	167	1.09756			167	1.0625	167	1.34375				167	1.15789	167	1.84211
168	0.827586	168	1.19828				168	0.611111	168	1.05556				168	1.13445	168	1.01261				168	1.04688	168	0.882812				168	1.17073	168	1.09756			168	1.09375	168	1.34375				168	1.18421	168	1.84211
169	0.827586	169	1.19828				169	0.611111	169	1.05556				169	1.13445	169	1.01261				169	1.04688	169	0.902344				169	1.17073	169	1.09756			169	1.09375	169	1.34375				169	1.18421	169	1.84211
170	0.836207	170	1.2069				170	0.666667	170	1.05556				170	1.15546	170	1.02941				170	1.04688	170	0.921875				170	1.17073	170	1.09756			170	1.125	170	1.375				170	1.18421	170	1.89474
171	0.836207	171	1.21552				171	0.666667	171	1.05556				171	1.16387	171	1.02941				171	1.04688	171	0.9375				171	1.17073	171	1.09756			171	1.125	171	1.375				171	1.18421	171	1.89474
172	0.844828	172	1.22414				172	0.666667	172	1.05556				172	1.16387	172	1.05042				172	1.04688	172	0.953125				172	1.19512	172	1.09756			172	1.125	172	1.375				172	1.18421	172	1.89474
173	0.853448	173	1.22414				173	0.666667	173	1.05556				173	1.16807	173	1.05042				173	1.04688	173	0.957031				173	1.19512	173	1.09756			173	1.125	173	1.375				173	1.21053	173	1.89474
174	0.862069	174	1.22414				174	0.722222	174	1.05556				174	1.18908	174	1.05042				174	1.04688	174	0.980469				174	1.19512	174	1.09756			174	1.125	174	1.375				174	1.21053	174	1.94737
175	0.862069	175	1.22414				175	0.722222	175	1.05556				175	1.19328	175	1.05042				175	1.04688	175	0.988281				175	1.19512	175	1.09756			175	1.125	175	1.375				175	1.21053	175	1.94737
176	0.87069	176	1.25862				176	0.722222	176	1.05556				176	1.22269	176	1.05882				176	1.04688	176	1.00391				176	1.21951	176	1.09756			176	1.125	176	1.375				176	1.21053	176	1.94737
177	0.87069	177	1.25862				177	0.722222	177	1.05556				177	1.22269	177	1.06723				177	1.04688	177	1.02344				177	1.2439	177	1.09756			177	1.125	177	1.375				177	1.21053	177	1.94737
178	0.887931	178	1.27586				178	0.722222	178	1.05556				178	1.23529	178	1.07143				178	1.04688	178	1.03125				178	1.2439	178	1.09756			178	1.125	178	1.40625				178	1.21053	178	1.94737
179	0.887931	179	1.27586				179	0.722222	179	1.05556				179	1.23529	179	1.07143				179	1.04688	179	1.04688				179	1.2439	179	1.09756			179	1.125	179	1.40625				179	1.21053	179	1.94737
180	0.896552	180	1.28448				180	0.722222	180	1.05556				180	1.2605	180	1.07983				180	1.04688	180	1.05859				180	1.26829	180	1.09756			180	1.15625	180	1.40625				180	1.23684	180	2
181	0.896552	181	1.28448				181	0.722222	181	1.05556				181	1.2605	181	1.08403				181	1.04688	181	1.07422				181	1.26829	181	1.09756			181	1.15625	181	1.40625				181	1.23684	181	2
182	0.905172	182	1.28448				182	0.722222	182	1.05556				182	1.27311	182	1.09664				182	1.04688	182	1.09766				182	1.26829	182	1.09756			182	1.15625	182	1.40625				182	1.23684	182	2.02632
183	0.905172	183	1.28448				183	0.777778	183	1.05556				183	1.27311	183	1.09664				183	1.04688	183	1.13281				183	1.26829	183	1.09756			183	1.15625	183	1.40625				183	1.23684	183	2.02632
184	0.913793	184	1.28448				184	0.833333	184	1.05556				184	1.27731	184	1.12185				184	1.04688	184	1.14844				184	1.26829	184	1.12195			184	1.1875	184	1.40625				184	1.23684	184	2.02632
185	0.913793	185	1.28448				185	0.833333	185	1.05556				185	1.27731	185	1.12185				185	1.04688	185	1.14844				185	1.26829	185	1.12195			185	1.1875	185	1.4375				185	1.23684	185	2.02632
186	0.931034	186	1.31034				186	0.833333	186	1.05556				186	1.29832	186	1.13025				186	1.05078	186	1.15625				186	1.26829					186	1.1875	186	1.4375				186	1.23684	186	2.02632
187	0.931034	187	1.31034				187	0.833333	187	1.05556				187	1.30252	187	1.13025						187	1.16406				187	1.26829					187	1.1875	187	1.4375				187	1.23684	187	2.02632
188	0.939655	188	1.31897				188	0.888889	188	1.05556				188	1.31092	188	1.15546						188	1.17188				188	1.26829					188	1.1875	188	1.5				188	1.26316	188	2.02632
189	0.939655	189	1.31897				189	0.888889	189	1.05556				189	1.31092	189	1.15546						189	1.17969				189	1.26829					189	1.1875	189	1.5				189	1.28947	189	2.02632
190	0.974138	190	1.33621				190	0.888889	190	1.05556				190	1.33193	190	1.17227						190	1.1875				190	1.26829					190	1.25	190	1.5				190	1.28947	190	2.07895
191	0.974138	191	1.33621				191	0.888889	191	1.05556				191	1.33193	191	1.17227						191	1.1875				191	1.26829					191	1.25	191	1.53125				191	1.28947	191	2.07895
192	0.974138	192	1.35345				192	0.944444	192	1.05556				192	1.34454	192	1.20168						192	1.19141				192	1.26829					192	1.25	192	1.53125				192	1.28947	192	2.13158
193	0.982759	193	1.35345				193	0.944444	193	1.05556				193	1.34454	193	1.20168						193	1.19922				193	1.26829					193	1.25	193	1.53125				193	1.28947	193	2.13158
194	0.991379	194	1.36207				194	0.944444	194	1.05556				194	1.36555	194	1.23529						194	1.19922				194	1.26829					194	1.25	194	1.53125				194	1.31579	194	2.15789
195	0.991379	195	1.37069				195	0.944444	195	1.05556				195	1.36975	195	1.2395						195	1.19922				195	1.26829					195	1.25	195	1.53125				195	1.34211	195	2.15789
196	1	196	1.37931				196	0.944444	196	1.05556				196	1.40336	196	1.26891						196	1.20312				196	1.31707					196	1.25	196	1.53125				196	1.34211	196	2.15789
197	1	197	1.37931				197	0.944444	197	1.05556				197	1.40756	197	1.26891						197	1.21094				197	1.31707					197	1.25	197	1.53125				197	1.34211	197	2.15789
198	1	198	1.38793				198	0.944444	198	1.05556				198	1.44118	198	1.27731						198	1.21094				198	1.31707					198	1.25	198	1.53125				198	1.39474	198	2.18421
199	1	199	1.38793				199	1	199	1.05556				199	1.44118	199	1.27731						199	1.21094				199	1.31707					199	1.25	199	1.53125				199	1.39474	199	2.18421
200	1	200	1.38793				200	1	200	1.05556				200	1.44538	200	1.29832						200	1.21484
201	1	201	1.38793				201	1	201	1.16667				201	1.44958	201	1.29832						201	1.21875
202	1.00862	202	1.41379				202	1	202	1.16667				202	1.46218	202	1.30252						202	1.22266
203	1.00862	203	1.41379				203	1	203	1.16667				203	1.47479	203	1.30672						203	1.22266
204	1.01724	204	1.41379				204	1	204	1.16667				204	1.5	204	1.32773						204	1.22266
205	1.01724	205	1.41379				205	1	205	1.16667				205	1.5042	205	1.32773						205	1.22656
206	1.01724	206	1.43103				206	1	206	1.16667				206	1.51261	206	1.34034						206	1.22656
207	1.01724	207	1.43103				207	1	207	1.16667				207	1.51261	207	1.34034						207	1.23047
208	1.05172	208	1.43966				208	1	208	1.16667				208	1.53361	208	1.34034						208	1.23047
209	1.05172	209	1.43966				209	1	209	1.16667				209	1.53782	209	1.34034						209	1.23438
210	1.05172	210	1.44828				210	1	210	1.16667				210	1.55042	210	1.35294						210	1.23828
211	1.05172	211	1.44828				211	1	211	1.16667				211	1.55042	211	1.35294						211	1.24219
212	1.06034	212	1.47414				212	1	212	1.22222				212	1.55882	212	1.38235						212	1.24609
213	1.06034	213	1.47414				213	1	213	1.22222				213	1.55882	213	1.38235						213	1.24609
214	1.08621	214	1.48276				214	1	214	1.22222				214	1.57143	214	1.39076						214	1.24609
215	1.08621	215	1.48276				215	1	215	1.22222				215	1.57143	215	1.39076						215	1.24609
216	1.09483	216	1.49138				216	1.11111	216	1.22222				216	1.57563	216	1.39916						216	1.24609
217	1.09483	217	1.5				217	1.11111	217	1.22222				217	1.57563	217	1.39916						217	1.24609
218	1.09483	218	1.5431				218	1.11111	218	1.22222				218	1.58824	218	1.40756						218	1.25781
219	1.09483	219	1.5431				219	1.11111	219	1.22222				219	1.58824	219	1.41176						219	1.25781
220	1.12069	220	1.55172				220	1.11111	220	1.22222				220	1.60504	220	1.43277						220	1.26172
221	1.12069	221	1.55172				221	1.11111	221	1.22222				221	1.60504	221	1.43277						221	1.26172
222	1.13793	222	1.57759				222	1.11111	222	1.22222				222	1.61765	222	1.44958						222	1.26172
223	1.14655	223	1.57759				223	1.11111	223	1.22222				223	1.61765	223	1.44958						223	1.26562
224	1.15517	224	1.58621				224	1.11111	224	1.22222				224	1.62185	224	1.45378						224	1.26562
225	1.15517	225	1.58621				225	1.11111	225	1.22222				225	1.62185	225	1.45378						225	1.26953
226	1.15517	226	1.61207				226	1.16667	226	1.22222				226	1.63025	226	1.45798						226	1.26953
227	1.16379	227	1.61207				227	1.16667	227	1.22222				227	1.63445	227	1.45798						227	1.26953
228	1.17241	228	1.61207				228	1.16667	228	1.22222				228	1.63866	228	1.46639						228	1.27344
229	1.17241	229	1.61207				229	1.16667	229	1.22222				229	1.63866	229	1.46639						229	1.27344
230	1.17241	230	1.62069				230	1.16667	230	1.22222				230	1.64706	230	1.48739						230	1.27734
231	1.17241	231	1.62069				231	1.16667	231	1.27778				231	1.64706	231	1.4916						231	1.27734
232	1.17241	232	1.63793				232	1.16667	232	1.33333				232	1.65546	232	1.4958						232	1.28125
233	1.17241	233	1.63793				233	1.16667	233	1.33333				233	1.65546	233	1.4958						233	1.28125
234	1.18103	234	1.64655				234	1.16667	234	1.33333				234	1.67227	234	1.51681						234	1.28125
235	1.18103	235	1.64655				235	1.16667	235	1.33333				235	1.67227	235	1.51681						235	1.28125
236	1.18103	236	1.65517				236	1.22222	236	1.38889				236	1.68908	236	1.51681						236	1.28125
237	1.18103	237	1.65517				237	1.22222	237	1.38889				237	1.68908	237	1.52101						237	1.28125
238	1.18966	238	1.67241				238	1.22222	238	1.38889				238	1.69748	238	1.53361						238	1.28125
239	1.18966	239	1.67241				239	1.22222	239	1.44444				239	1.69748	239	1.53361						239	1.28125
240	1.18966	240	1.68103				240	1.22222	240	1.44444				240	1.70168	240	1.54202						240	1.28516
241	1.18966	241	1.68103				241	1.22222	241	1.44444				241	1.70168	241	1.54202						241	1.28516
242	1.18966	242	1.69828				242	1.22222	242	1.44444				242	1.70588	242	1.54622						242	1.28516
243	1.18966	243	1.69828				243	1.22222	243	1.44444				243	1.70588	243	1.54622						243	1.28516
244	1.19828	244	1.7069				244	1.22222	244	1.44444				244	1.71849	244	1.55462						244	1.28516
245	1.19828	245	1.7069				245	1.22222	245	1.44444				245	1.71849	245	1.55462						245	1.28906
246	1.21552	246	1.71552				246	1.22222	246	1.44444				246	1.73109	246	1.55462						246	1.28906
247	1.21552	247	1.71552				247	1.22222	247	1.5				247	1.73109	247	1.55462						247	1.28906
248	1.22414	248	1.73276				248	1.22222	248	1.5				248	1.73529	248	1.56303						248	1.28906
249	1.22414	249	1.73276				249	1.22222	249	1.5				249	1.7395	249	1.56303						249	1.28906
250	1.22414	250	1.75				250	1.27778	250	1.5				250	1.7437	250	1.57143						250	1.28906
251	1.22414	251	1.75				251	1.27778	251	1.5				251	1.7437	251	1.57143						251	1.28906
252	1.22414	252	1.75				252	1.27778	252	1.5				252	1.7479	252	1.57983						252	1.28906
253	1.22414	253	1.75				253	1.33333	253	1.5				253	1.7479	253	1.57983						253	1.28906
254	1.23276	254	1.75				254	1.33333	254	1.5				254	1.76891	254	1.58403						254	1.28906
255	1.23276	255	1.75				255	1.33333	255	1.5				255	1.76891	255	1.58403						255	1.28906
256	1.23276	256	1.75862				256	1.33333	256	1.5				256	1.78151	256	1.58824						256	1.28906
257	1.23276	257	1.75862				257	1.33333	257	1.5				257	1.78151	257	1.59664						257	1.28906
258	1.24138	258	1.75862				258	1.33333	258	1.5				258	1.78992	258	1.60084						258	1.28906
259	1.24138	259	1.75862				259	1.33333	259	1.5				259	1.78992	259	1.60084						259	1.28906
260	1.25	260	1.75862				260	1.33333	260	1.5				260	1.78992	260	1.60504						260	1.28906
261	1.25	261	1.75862				261	1.33333	261	1.5				261	1.78992	261	1.60504						261	1.28906
262	1.26724	262	1.76724				262	1.33333	262	1.5				262	1.80672	262	1.62185						262	1.28906
263	1.26724	263	1.76724				263	1.33333	263	1.5				263	1.80672	263	1.62185						263	1.29297
264	1.26724	264	1.76724				264	1.33333	264	1.5				264	1.81092	264	1.63025						264	1.29297
265	1.26724	265	1.76724				265	1.33333	265	1.5
266	1.27586	266	1.78448				266	1.33333	266	1.5
267	1.27586	267	1.78448				267	1.33333	267	1.5
268	1.2931	268	1.7931				268	1.33333	268	1.5
269	1.2931	269	1.7931				269	1.33333	269	1.5
270	1.2931	270	1.81897				270	1.33333	270	1.5
271	1.2931	271	1.81897				271	1.33333	271	1.5
272	1.2931	272	1.82759				272	1.33333	272	1.5
273	1.2931	273	1.82759				273	1.38889	273	1.5
274	1.30172	274	1.83621				274	1.44444	274	1.5
275	1.30172	275	1.83621				275	1.44444	275	1.5
276	1.31897	276	1.84483				276	1.44444	276	1.5
277	1.31897	277	1.84483				277	1.44444	277	1.5
278	1.31897	278	1.85345				278	1.44444	278	1.5
279	1.31897	279	1.85345				279	1.44444	279	1.5
280	1.33621	280	1.87931				280	1.44444	280	1.55556
281	1.33621	281	1.87931				281	1.44444	281	1.55556
282	1.33621	282	1.88793				282	1.44444	282	1.55556
283	1.33621	283	1.88793				283	1.44444	283	1.55556
284	1.34483	284	1.90517				284	1.44444	284	1.55556
285	1.34483	285	1.90517				285	1.44444	285	1.55556
286	1.34483	286	1.91379				286	1.44444	286	1.55556
287	1.34483	287	1.91379				287	1.44444	287	1.55556
288	1.34483	288	1.91379				288	1.44444	288	1.55556
289	1.34483	289	1.91379				289	1.44444	289	1.55556
290	1.35345	290	1.92241				290	1.44444	290	1.55556
291	1.35345	291	1.92241				291	1.44444	291	1.55556
292	1.36207	292	1.93103				292	1.44444	292	1.55556
293	1.36207	293	1.93103				293	1.44444	293	1.55556
294	1.36207	294	1.93103				294	1.44444	294	1.61111
295	1.36207	295	1.93103				295	1.5	295	1.61111
296	1.36207	296	1.93103				296	1.5	296	1.61111
297	1.37069	297	1.93103				297	1.5	297	1.66667
298	1.37069	298	1.93103				298	1.5	298	1.66667
299	1.37931	299	1.93103				299	1.5	299	1.66667
300	1.39655	300	1.93966				300	1.55556	300	1.66667
301	1.39655	301	1.93966				301	1.55556	301	1.66667
302	1.39655	302	1.94828				302	1.61111	302	1.66667
303	1.39655	303	1.94828				303	1.61111	303	1.66667
304	1.39655	304	1.9569				304	1.61111	304	1.66667
305	1.39655	305	1.9569				305	1.61111	305	1.66667
306	1.40517	306	1.97414				306	1.61111	306	1.66667
307	1.40517	307	1.97414				307	1.61111	307	1.66667
308	1.40517	308	1.97414				308	1.61111	308	1.72222
309	1.40517	309	1.97414				309	1.61111	309	1.77778
310	1.41379	310	1.98276				310	1.61111	310	1.77778
311	1.41379	311	1.98276				311	1.61111	311	1.83333
312	1.42241	312	1.99138				312	1.61111	312	1.83333
313	1.42241	313	1.99138				313	1.61111	313	1.83333
314	1.43103	314	1.99138				314	1.61111	314	1.83333
315	1.43103	315	1.99138				315	1.61111	315	1.83333
316	1.43103	316	1.99138				316	1.61111	316	1.83333
317	1.43103	317	1.99138				317	1.61111	317	1.83333
318	1.43966	318	1.99138				318	1.61111	318	1.83333
319	1.43966	319	1.99138				319	1.61111	319	1.83333
320	1.43966	320	2				320	1.61111	320	1.83333
321	1.43966	321	2				321	1.61111	321	1.83333
322	1.4569	322	2				322	1.61111	322	1.83333
323	1.4569	323	2				323	1.61111	323	1.83333
324	1.4569	324	2				324	1.61111	324	1.83333
325	1.4569	325	2				325	1.61111	325	1.83333
326	1.4569	326	2				326	1.61111	326	1.83333
327	1.4569	327	2				327	1.61111	327	1.83333
328	1.47414	328	2				328	1.61111	328	1.83333
329	1.47414	329	2				329	1.61111	329	1.88889
330	1.47414	330	2.00862				330	1.61111	330	1.88889
331	1.47414	331	2.00862				331	1.61111	331	1.88889
332	1.47414	332	2.00862				332	1.61111	332	1.88889
333	1.47414	333	2.00862				333	1.61111	333	1.88889
334	1.48276	334	2.00862				334	1.66667	334	1.94444
335	1.48276	335	2.00862				335	1.66667	335	1.94444
336	1.5	336	2.00862				336	1.66667	336	1.94444
337	1.5	337	2.00862				337	1.66667	337	1.94444
338	1.50862	338	2.01724				338	1.66667	338	1.94444
339	1.50862	339	2.01724				339	1.66667	339	1.94444
340	1.5431	340	2.02586				340	1.66667	340	1.94444
341	1.5431	341	2.02586				341	1.66667	341	1.94444
342	1.5431	342	2.02586				342	1.66667	342	1.94444
343	1.5431	343	2.02586				343	1.66667	343	1.94444
344	1.56034	344	2.02586				344	1.66667	344	1.94444
345	1.56034	345	2.02586				345	1.66667	345	1.94444
346	1.56034	346	2.02586				346	1.66667	346	1.94444
347	1.56034	347	2.02586				347	1.66667	347	1.94444
348	1.58621	348	2.02586				348	1.66667	348	1.94444
349	1.58621	349	2.02586				349	1.66667	349	1.94444
