# Supplementary material for: The transition state and regulation of γ-TuRC-mediated microtubule nucleation revealed by single molecule microscopy
Source: eLife. 2020 Jun 15;9:e54253. doi: 10.7554/eLife.54253 (PMC7338055; doi:10.7554/eLife.54253)
Supplement: Figure 7—source data 1. — Each excel sheet is labelled with individual figure panel. For Figure 7D, all five experimental replicates are supplied, and dataset one is plotted. Source Code. MATLAB code for Monte Carlo simulations used to model the dynamics of γ-TuRC-mediated nucleation. Materials and methods section details how the simulation was set up and performed. Figure 5—figure supplement 2 provide the parameters used to model our experimental data. [file elife-54253-fig7-data1.xlsx]

## Sheet: Figure 7B
gTuRC nucleation with XMAP215
	Data-set 1							Data-set 2							Data-set 3
Control: gTuRC, - XMAP215		Experiment: gTuRC, + 20nM XMAP215					Control: gTuRC, - XMAP215		Experiment: gTuRC, + 20nM XMAP215					Control: gTuRC, - XMAP215		Experiment: gTuRC, + 20nM XMAP215
Time (seconds)	Normalized nucleation activity	Time (seconds)	Normalized nucleation activity				Time (seconds)	Normalized nucleation activity	Time (seconds)	Normalized nucleation activity				Time (seconds)	Normalized nucleation activity	Time (seconds)	Normalized nucleation activity
0	0	0	0				0	0	0	0.0769231				0	0	0	0.166667
1	0	1	0				1	0	1	0.0769231				1	0	1	0.166667
2	0	2	0				2	0	2	0.0769231				2	0	2	0.166667
3	0	3	0				3	0	3	0.0769231				3	0	3	0.166667
4	0	4	0				4	0	4	0.0769231				4	0	4	0.166667
5	0	5	0				5	0	5	0.0769231				5	0	5	0.166667
6	0	6	0				6	0.0769231	6	0.0769231				6	0	6	0.166667
7	0	7	0				7	0.0769231	7	0.0769231				7	0	7	0.166667
8	0	8	0				8	0.0769231	8	0.0769231				8	0	8	0.166667
9	0	9	0				9	0.0769231	9	0.0769231				9	0	9	0.333333
10	0	10	0				10	0.0769231	10	0.0769231				10	0	10	0.333333
11	0	11	0				11	0.0769231	11	0.0769231				11	0	11	0.333333
12	0	12	0				12	0.0769231	12	0.0769231				12	0	12	0.333333
13	0	13	0				13	0.0769231	13	0.0769231				13	0	13	0.333333
14	0	14	0				14	0.0769231	14	0.0769231				14	0	14	0.333333
15	0	15	0				15	0.0769231	15	0.0769231				15	0	15	0.333333
16	0	16	0				16	0.0769231	16	0.0769231				16	0	16	0.5
17	0	17	0				17	0.0769231	17	0.0769231				17	0	17	0.666667
18	0	18	0				18	0.0769231	18	0.0769231				18	0	18	0.666667
19	0	19	0				19	0.0769231	19	0.0769231				19	0	19	0.833333
20	0	20	0				20	0.0769231	20	0.230769				20	0	20	1.16667
21	0	21	0				21	0.0769231	21	0.230769				21	0.166667	21	1.16667
22	0.125	22	0				22	0.0769231	22	0.230769				22	0.166667	22	1.16667
23	0.125	23	0.125				23	0.0769231	23	0.384615				23	0.166667	23	1.16667
24	0.125	24	0.125				24	0.0769231	24	0.384615				24	0.166667	24	1.16667
25	0.125	25	0.125				25	0.0769231	25	0.384615				25	0.166667	25	1.16667
26	0.125	26	0.25				26	0.0769231	26	0.384615				26	0.166667	26	1.5
27	0.125	27	0.25				27	0.0769231	27	0.461538				27	0.166667	27	1.66667
28	0.125	28	0.375				28	0.0769231	28	0.615385				28	0.166667	28	1.66667
29	0.125	29	0.625				29	0.0769231	29	0.846154				29	0.166667	29	1.83333
30	0.125	30	0.625				30	0.153846	30	0.923077				30	0.166667	30	1.83333
31	0.125	31	0.625				31	0.153846	31	1.15385				31	0.166667	31	2.16667
32	0.125	32	0.625				32	0.153846	32	1.23077				32	0.166667	32	2.16667
33	0.125	33	0.625				33	0.153846	33	1.46154				33	0.166667	33	2.16667
34	0.125	34	0.75				34	0.230769	34	1.76923				34	0.166667	34	2.5
35	0.125	35	0.75				35	0.230769	35	1.92308				35	0.166667	35	2.66667
36	0.125	36	0.75				36	0.230769	36	2.46154				36	0.166667	36	3
37	0.125	37	0.75				37	0.230769	37	2.69231				37	0.166667	37	3
38	0.125	38	0.875				38	0.230769	38	3.15385				38	0.166667	38	3.33333
39	0.125	39	1.125				39	0.230769	39	3.38462				39	0.166667	39	3.5
40	0.125	40	1.5				40	0.230769	40	3.76923				40	0.166667	40	3.5
41	0.125	41	1.625				41	0.230769	41	4				41	0.166667	41	3.83333
42	0.125	42	1.625				42	0.230769	42	4.46154				42	0.166667	42	4
43	0.125	43	1.875				43	0.230769	43	4.76923				43	0.166667	43	4
44	0.125	44	2				44	0.307692	44	4.84615				44	0.166667	44	4.16667
45	0.125	45	2.125				45	0.307692	45	5.30769				45	0.166667	45	4.16667
46	0.125	46	2.5				46	0.307692	46	5.46154				46	0.166667	46	4.33333
47	0.125	47	2.75				47	0.307692	47	5.61538				47	0.166667	47	4.5
48	0.25	48	3.375				48	0.307692	48	5.76923				48	0.166667	48	4.83333
49	0.25	49	4				49	0.307692	49	5.76923				49	0.166667	49	5
50	0.375	50	4.125				50	0.307692	50	6.53846				50	0.166667	50	5.16667
51	0.375	51	4.75				51	0.307692	51	6.69231				51	0.166667	51	5.33333
52	0.375	52	5				52	0.307692	52	7.15385				52	0.166667	52	5.5
53	0.375	53	5.75				53	0.307692	53	7.38462				53	0.166667	53	5.5
54	0.375	54	6.125				54	0.307692	54	8.07692				54	0.166667	54	6.33333
55	0.375	55	6.625				55	0.307692	55	8.15385				55	0.333333	55	6.83333
56	0.375	56	7				56	0.307692	56	8.53846				56	0.333333	56	6.83333
57	0.375	57	7.125				57	0.307692	57	8.69231				57	0.333333	57	6.83333
58	0.375	58	9.625				58	0.384615	58	9.15385				58	0.333333	58	7.33333
59	0.375	59	9.875				59	0.384615	59	9.15385				59	0.333333	59	7.66667
60	0.375	60	12				60	0.384615	60	9.76923				60	0.333333	60	7.83333
61	0.375	61	12				61	0.384615	61	9.84615				61	0.333333	61	8
62	0.375	62	12.875				62	0.384615	62	10.3846				62	0.5	62	8
63	0.375	63	12.875				63	0.384615	63	10.4615				63	0.5	63	8.33333
64	0.375	64	14.375				64	0.384615	64	11				64	0.5	64	8.33333
65	0.375	65	14.375				65	0.384615	65	11.0769				65	0.5	65	8.33333
66	0.375	66	15.625				66	0.384615	66	11.2308				66	0.5	66	8.5
67	0.375	67	15.625				67	0.384615	67	11.2308				67	0.5	67	9.16667
68	0.375	68	16.875				68	0.384615	68	11.6154				68	0.5	68	9.33333
69	0.375	69	16.875				69	0.384615	69	11.6923				69	0.5	69	9.5
70	0.375	70	17.5				70	0.384615	70	11.9231				70	0.5	70	9.66667
71	0.5	71	17.625				71	0.384615	71	11.9231				71	0.5	71	9.83333
72	0.5	72	19.125				72	0.384615	72	12.3846				72	0.666667	72	10.1667
73	0.5	73	19.125				73	0.461538	73	12.3846				73	0.666667	73	10.6667
74	0.5	74	20.25				74	0.461538	74	12.9231				74	0.666667	74	11.1667
75	0.5	75	20.25				75	0.461538	75	13.0769				75	0.666667	75	11.5
76	0.5	76	21.375				76	0.538462	76	13.2308				76	0.666667	76	11.8333
77	0.5	77	21.375				77	0.538462	77	13.2308				77	0.666667	77	12.3333
78	0.5	78	22.375				78	0.538462	78	13.7692				78	0.666667	78	12.6667
79	0.5	79	22.375				79	0.538462	79	13.8462				79	0.666667	79	12.8333
80	0.625	80	23.25				80	0.538462	80	14.2308				80	0.666667	80	12.8333
81	0.625	81	23.375				81	0.615385	81	14.3846				81	0.666667	81	12.8333
82	0.625	82	23.875				82	0.615385	82	14.6923				82	0.666667	82	12.8333
83	0.625	83	23.875				83	0.615385	83	14.7692				83	0.666667	83	13
84	0.625	84	24.25				84	0.692308	84	15.1538				84	0.666667	84	13
85	0.625	85	24.25				85	0.692308	85	15.1538				85	0.666667	85	13.1667
86	0.625	86	25.125				86	0.692308	86	15.5385				86	0.666667	86	13.5
87	0.625	87	25.125				87	0.692308	87	15.6154				87	0.666667	87	13.6667
88	0.625	88	26				88	0.692308	88	16.0769				88	0.666667	88	13.8333
89	0.625	89	26				89	0.692308	89	16.2308				89	0.666667	89	13.8333
90	0.625	90	26.5				90	0.692308	90	16.7692				90	0.833333	90	14
91	0.75	91	26.5				91	0.769231	91	16.7692				91	0.833333	91	14.3333
92	0.75	92	27.5				92	0.769231	92	17.0769				92	0.833333	92	14.6667
93	0.75	93	27.625				93	0.769231	93	17.1538				93	0.833333	93	14.6667
94	0.75	94	28.375				94	0.769231	94	17.3846				94	0.833333	94	14.8333
95	0.75	95	28.5				95	0.769231	95	17.3846				95	0.833333	95	14.8333
96	0.75	96	29.125				96	0.769231	96	17.4615				96	0.833333	96	15
97	0.75	97	29.125				97	0.769231	97	17.6154				97	0.833333	97	15.1667
98	0.75	98	29.5				98	0.769231	98	17.8462				98	0.833333	98	15.1667
99	0.75	99	29.5				99	0.923077	99	17.8462				99	0.833333	99	15.3333
100	0.75	100	29.875				100	0.923077	100	18.0769				100	1	100	15.5
101	0.75	101	29.875				101	0.923077	101	18.0769				101	1	101	15.5
102	0.75	102	30.5				102	0.923077	102	18.4615				102	1	102	16
103	0.75	103	30.5				103	0.923077	103	18.5385				103	1	103	16
104	0.75	104	31.375				104	0.923077	104	18.6923				104	1	104	16.1667
105	0.75	105	31.375				105	0.923077	105	18.7692				105	1	105	16.1667
106	0.875	106	32				106	0.923077	106	19.0769				106	1	106	16.5
107	0.875	107	32				107	0.923077	107	19.0769				107	1	107	16.5
108	0.875	108	32.375				108	0.923077	108	19.1538				108	1	108	16.5
109	0.875	109	32.375				109	0.923077	109	19.3077				109	1	109	16.5
110	0.875	110	32.625				110	1	110	19.6154				110	1	110	16.8333
111	0.875	111	32.625				111	1	111	19.6154				111	1	111	16.8333
112	0.875	112	33.375				112	1	112	19.8462				112	1	112	17
113	0.875	113	33.5				113	1	113	19.8462				113	1	113	17
114	0.875	114	34				114	1	114	20.1538				114	1	114	17.3333
115	0.875	115	34				115	1	115	20.1538				115	1	115	17.3333
116	0.875	116	34.625				116	1	116	20.6154				116	1	116	17.5
117	0.875	117	34.625				117	1	117	20.6154				117	1	117	17.5
118	1	118	35.125				118	1	118	20.9231				118	1	118	17.6667
119	1	119	35.125				119	1	119	20.9231				119	1	119	17.6667
120	1	120	35.375				120	1	120	21.1538				120	1	120	17.8333
121	1.125	121	35.375				121	1	121	21.3077				121	1	121	17.8333
122	1.125	122	35.875				122	1	122	21.5385				122	1	122	18
123	1.125	123	35.875				123	1	123	21.6154				123	1	123	18
124	1.125	124	36.25				124	1	124	21.6923				124	1	124	18.1667
125	1.125	125	36.25				125	1	125	21.7692				125	1	125	18.1667
126	1.125	126	36.75				126	1	126	22.0769				126	1	126	19.1667
127	1.125	127	36.75				127	1	127	22.1538				127	1	127	19.1667
128	1.125	128	36.875				128	1.07692	128	22.3077				128	1	128	19.5
129	1.125	129	36.875				129	1.07692	129	22.3846				129	1.16667	129	19.5
130	1.125	130	36.875				130	1.15385	130	22.7692				130	1.16667	130	19.6667
131	1.125	131	36.875				131	1.15385	131	22.8462				131	1.16667	131	19.8333
132	1.125	132	37				132	1.15385	132	22.9231				132	1.16667	132	20.1667
133	1.125	133	37				133	1.15385	133	23				133	1.16667	133	20.1667
134	1.25	134	37.25				134	1.15385	134	23				134	1.16667	134	20.5
135	1.25	135	37.25				135	1.15385	135	23				135	1.16667	135	20.5
136	1.25	136	37.5				136	1.30769	136	23.3077				136	1.16667	136	20.5
137	1.25	137	37.625				137	1.30769	137	23.3077				137	1.16667	137	20.5
138	1.25	138	37.75				138	1.30769	138	23.3846				138	1.16667	138	20.6667
139	1.25	139	37.75				139	1.30769	139	23.5385				139	1.16667	139	20.6667
140	1.25						140	1.30769	140	23.8462				140	1.16667	140	21
141	1.25						141	1.30769	141	23.9231				141	1.16667	141	21
142	1.25						142	1.38462	142	24				142	1.16667	142	21.3333
143	1.25						143	1.38462	143	24				143	1.16667	143	21.5
144	1.25						144	1.38462	144	24.0769				144	1.33333	144	21.6667
145	1.25						145	1.38462	145	24.0769				145	1.33333	145	21.6667
146	1.25						146	1.38462	146	24.2308				146	1.33333	146	21.6667
147	1.25						147	1.38462	147	24.2308				147	1.33333	147	21.6667
148	1.25						148	1.46154	148	24.2308				148	1.33333	148	21.6667
149	1.25						149	1.46154	149	24.3846				149	1.33333	149	21.8333
150	1.25						150	1.46154	150	24.6923				150	1.33333	150	22
151	1.25						151	1.46154	151	24.6923				151	1.33333	151	22
152	1.25						152	1.46154	152	25				152	1.33333	152	22.1667
153	1.25						153	1.46154	153	25				153	1.33333	153	22.1667
154	1.25						154	1.46154	154	25.1538				154	1.33333	154	22.3333
155	1.25						155	1.46154	155	25.1538				155	1.33333	155	22.3333
156	1.25						156	1.46154	156	25.3077				156	1.33333	156	22.5
157	1.25						157	1.46154	157	25.3077				157	1.33333	157	22.5
158	1.25						158	1.46154	158	25.5385				158	1.33333	158	22.8333
159	1.25						159	1.46154	159	25.5385				159	1.33333	159	22.8333
160	1.25						160	1.46154	160	25.7692				160	1.33333	160	22.8333
161	1.25						161	1.46154	161	25.7692				161	1.33333	161	22.8333
162	1.375						162	1.46154	162	26				162	1.33333	162	23.1667
163	1.375						163	1.46154	163	26				163	1.33333	163	23.3333
164	1.375						164	1.46154	164	26.0769				164	1.33333	164	23.6667
165	1.375						165	1.53846	165	26.0769				165	1.33333	165	23.8333
166	1.375						166	1.53846	166	26.2308				166	1.33333	166	24
167	1.375						167	1.53846	167	26.2308				167	1.33333	167	24
168	1.375						168	1.53846	168	26.2308				168	1.5	168	24.3333
169	1.375						169	1.53846	169	26.2308				169	1.5	169	24.5
170	1.375						170	1.53846	170	26.4615				170	1.5	170	24.6667
171	1.375						171	1.53846	171	26.4615				171	1.5	171	24.6667
172	1.5						172	1.53846	172	26.9231				172	1.5	172	25
173	1.5						173	1.53846	173	27.0769				173	1.5	173	25
174	1.5						174	1.53846	174	27.1538				174	1.5	174	25.1667
175	1.5						175	1.53846	175	27.1538				175	1.5	175	25.1667
176	1.5						176	1.53846	176	27.2308				176	1.5	176	25.1667
177	1.5						177	1.53846	177	27.2308				177	1.5	177	25.1667
178	1.5						178	1.53846	178	27.3846				178	1.5	178	25.3333
179	1.5						179	1.53846	179	27.4615				179	1.5	179	25.3333
180	1.5						180	1.53846	180	27.7692				180	1.5	180	25.8333
181	1.5						181	1.53846	181	27.7692				181	1.5	181	25.8333
182	1.5						182	1.53846	182	27.9231				182	1.5	182	25.8333
183	1.5						183	1.53846	183	27.9231				183	1.5	183	25.8333
184	1.5						184	1.53846	184	27.9231				184	1.5	184	26.1667
185	1.5						185	1.53846	185	27.9231				185	1.5	185	26.1667
186	1.5						186	1.61538	186	27.9231				186	1.5	186	26.3333
187	1.5						187	1.61538	187	27.9231				187	1.5	187	26.3333
188	1.5						188	1.61538	188	28				188	1.5	188	26.6667
189	1.5						189	1.61538	189	28				189	1.5	189	26.8333
190	1.5						190	1.61538	190	28.1538				190	1.5	190	27
191	1.5						191	1.61538	191	28.1538				191	1.5	191	27
192	1.5						192	1.69231	192	28.1538				192	1.5	192	27
193	1.5						193	1.69231	193	28.2308				193	1.5	193	27
194	1.5						194	1.69231	194	28.2308				194	1.5	194	27.1667
195	1.5						195	1.69231	195	28.2308				195	1.5	195	27.1667
196	1.5						196	1.76923	196	28.3077				196	1.5	196	27.5
197	1.5						197	1.76923	197	28.3077				197	1.5	197	27.5
198	1.5						198	1.84615	198	28.3846				198	1.5	198	27.6667
199	1.5						199	1.84615	199	28.3846				199	1.5	199	27.6667
200	1.5						200	1.84615						200	1.66667	200	27.8333
201	1.5						201	1.84615						201	1.66667	201	27.8333
202	1.5						202	1.84615						202	1.66667	202	27.8333
203	1.5						203	1.84615						203	1.66667	203	27.8333
204	1.5						204	1.84615						204	1.83333	204	28.3333
205	1.5						205	1.84615						205	1.83333	205	28.3333
206	1.5						206	1.92308						206	1.83333	206	28.3333
207	1.5						207	2						207	1.83333	207	28.3333
208	1.625						208	2.07692						208	1.83333	208	28.6667
209	1.625						209	2.07692						209	1.83333	209	28.6667
210	1.625						210	2.15385						210	1.83333	210	28.8333
211	1.625						211	2.15385						211	1.83333	211	28.8333
212	1.625						212	2.15385						212	1.83333	212	28.8333
213	1.625						213	2.15385						213	1.83333	213	28.8333
214	1.625						214	2.15385						214	1.83333	214	28.8333
215	1.625						215	2.15385						215	1.83333	215	28.8333
216	1.625						216	2.15385						216	1.83333	216	29.1667
217	1.625						217	2.15385						217	1.83333	217	29.1667
218	1.625						218	2.15385						218	1.83333	218	29.5
219	1.625						219	2.15385						219	1.83333	219	29.5
220	1.625						220	2.15385						220	1.83333	220	29.5
221	1.625						221	2.15385						221	1.83333	221	29.5
222	1.625						222	2.15385						222	1.83333	222	29.8333
223	1.625						223	2.15385						223	1.83333	223	29.8333
224	1.625						224	2.15385						224	1.83333	224	29.8333
225	1.625						225	2.15385						225	1.83333	225	30
226	1.75						226	2.15385						226	2	226	30.1667
227	1.75						227	2.15385						227	2	227	30.1667
228	1.875						228	2.23077						228	2	228	30.1667
229	1.875						229	2.23077						229	2	229	30.1667
230	1.875						230	2.30769						230	2.16667	230	30.3333
231	1.875						231	2.30769						231	2.16667	231	30.3333
232	1.875						232	2.30769						232	2.16667	232	30.3333
233	1.875						233	2.30769						233	2.16667	233	30.3333
234	1.875						234	2.30769						234	2.16667	234	30.3333
235	1.875						235	2.30769						235	2.16667	235	30.3333
236	2						236	2.30769						236	2.16667	236	30.6667
237	2						237	2.30769						237	2.16667	237	30.6667
238	2						238	2.30769						238	2.16667	238	30.6667
239	2						239	2.30769						239	2.16667	239	30.6667
240	2						240	2.30769						240	2.16667	240	31
241	2						241	2.30769						241	2.16667	241	31
242	2						242	2.30769						242	2.16667	242	31.1667
243	2						243	2.30769						243	2.16667	243	31.1667
244	2.125						244	2.30769						244	2.16667	244	31.3333
245	2.125						245	2.30769						245	2.16667	245	31.3333
246	2.125						246	2.30769						246	2.16667	246	31.5
247	2.125						247	2.30769						247	2.16667	247	31.5
248	2.125						248	2.30769						248	2.16667	248	31.6667
249	2.125						249	2.30769						249	2.16667	249	31.6667
250	2.125						250	2.30769						250	2.16667	250	31.8333
251	2.125						251	2.30769						251	2.16667	251	31.8333
252	2.25						252	2.38462						252	2.16667	252	31.8333
253	2.25						253	2.38462						253	2.16667	253	31.8333
254	2.25						254	2.38462						254	2.16667	254	31.8333
255	2.25						255	2.38462						255	2.16667	255	31.8333
256	2.25						256	2.38462						256	2.16667	256	32
257	2.25						257	2.38462						257	2.16667	257	32
258	2.25						258	2.38462						258	2.16667	258	32.1667
259	2.25						259	2.38462						259	2.16667	259	32.1667
260	2.25						260	2.38462						260	2.16667	260	32.1667
261	2.375						261	2.38462						261	2.16667	261	32.1667
262	2.375						262	2.46154						262	2.16667	262	32.1667
263	2.375						263	2.46154						263	2.16667	263	32.1667
264	2.375						264	2.46154						264	2.16667	264	32.1667
265	2.375						265	2.46154						265	2.16667	265	32.1667
266	2.375						266	2.46154						266	2.16667	266	32.1667
267	2.375						267	2.46154						267	2.16667	267	32.1667
268	2.375						268	2.53846						268	2.16667	268	32.1667
269	2.375						269	2.53846						269	2.16667	269	32.1667
270	2.375						270	2.53846						270	2.16667	270	32.1667
271	2.375						271	2.53846						271	2.16667	271	32.1667
272	2.375						272	2.61538						272	2.16667	272	32.1667
273	2.375						273	2.61538						273	2.16667	273	32.1667
274	2.375						274	2.61538						274	2.16667	274	32.1667
275	2.375						275	2.61538						275	2.16667	275	32.1667
276	2.375						276	2.61538						276	2.16667	276	32.1667
277	2.375						277	2.61538						277	2.16667	277	32.1667
278	2.375						278	2.61538						278	2.16667	278	32.1667
279	2.375						279	2.61538						279	2.16667	279	32.1667
280	2.375						280	2.61538						280	2.16667	280	32.3333
281	2.375						281	2.61538						281	2.16667	281	32.3333
282	2.375						282	2.61538						282	2.33333
283	2.375						283	2.61538						283	2.33333
284	2.375						284	2.61538						284	2.33333
285	2.375						285	2.61538						285	2.33333
286	2.375						286	2.69231						286	2.33333
287	2.375						287	2.69231						287	2.33333
288	2.375						288	2.69231						288	2.5
289	2.375						289	2.69231						289	2.5
290	2.375						290	2.69231						290	2.5
291	2.375						291	2.69231						291	2.5
292	2.375						292	2.69231						292	2.5
293	2.375						293	2.69231						293	2.5
294	2.375						294	2.69231						294	2.66667
295	2.375						295	2.69231						295	2.66667
296	2.375						296	2.69231						296	2.66667
297	2.375						297	2.69231						297	2.66667
298	2.375						298	2.76923						298	2.83333

## Sheet: Figure 7D
g-TuRC+XMAP215 nucleation assay - nucleation versus time series							Data set 1												Data set 2										Data set 3								Data set 4						Data set 5
		1.6uM tubulin		2.4uM tubulin		3.5uM tubulin		5.2uM tubulin		7uM tubulin				1.6uM tubulin		2.4uM tubulin		3.5uM tubulin		5.2uM tubulin		7uM tubulin				2.4uM tubulin		3.5uM tubulin		5.2uM tubulin		7uM tubulin				3.5uM tubulin		7uM tubulin				3.5uM tubulin		7uM tubulin
		Time (seconds)	Number of MTs	Time (seconds)	Number of MTs	Time (seconds)	Number of MTs	Time (seconds)	Number of MTs	Time (seconds)	Number of MTs			Time (seconds)	Number of MTs	Time (seconds)	Number of MTs	Time (seconds)	Number of MTs	Time (seconds)	Number of MTs	Time (seconds)	Number of MTs			Time (seconds)	Number of MTs	Time (seconds)	Number of MTs	Time (seconds)	Number of MTs	Time (seconds)	Number of MTs			Time (seconds)	Number of MTs	Time (seconds)	Number of MTs			Time (seconds)	Number of MTs	Time (seconds)	Number of MTs
		0	0	0	0	0	1	0	0	0	0			0	0	0	0	0	0	0	2	0	3			0	0	0	0	0	0	0	1			0	0	0	0			0	0	0	1
		1	0	1	0	1	1	1	0	1	0			1	0	1	0	1	0	1	3	1	3			1	0	1	0	1	0	1	1			1	0	1	0			1	0	1	1
		2	0	2	0	2	1	2	0	2	0			2	0	2	0	2	0	2	3	2	3			2	0	2	0	2	0	2	1			2	0	2	0			2	0	2	1
		3	0	3	0	3	1	3	0	3	0			3	0	3	0	3	0	3	3	3	3			3	0	3	0	3	0	3	1			3	0	3	0			3	0	3	1
		4	0	4	0	4	1	4	0	4	0			4	0	4	0	4	0	4	3	4	3			4	0	4	0	4	0	4	2			4	0	4	0			4	0	4	1
		5	0	5	0	5	2	5	0	5	1			5	0	5	0	5	0	5	4	5	3			5	0	5	0	5	0	5	2			5	0	5	0			5	0	5	1
		6	0	6	0	6	2	6	0	6	1			6	0	6	0	6	0	6	4	6	3			6	0	6	0	6	0	6	2			6	0	6	0			6	0	6	1
		7	0	7	0	7	2	7	0	7	2			7	0	7	0	7	0	7	4	7	3			7	0	7	0	7	0	7	2			7	0	7	0			7	0	7	1
		8	0	8	0	8	2	8	0	8	3			8	0	8	0	8	0	8	5	8	3			8	0	8	0	8	0	8	2			8	0	8	0			8	0	8	1
		9	0	9	0	9	2	9	0	9	3			9	0	9	0	9	0	9	5	9	3			9	0	9	0	9	0	9	3			9	0	9	0			9	0	9	1
		10	0	10	0	10	2	10	0	10	4			10	0	10	0	10	0	10	6	10	4			10	0	10	0	10	0	10	4			10	0	10	0			10	0	10	1
		11	0	11	0	11	2	11	0	11	5			11	0	11	0	11	0	11	6	11	4			11	0	11	0	11	0	11	4			11	0	11	0			11	0	11	1
		12	0	12	0	12	2	12	0	12	6			12	0	12	0	12	0	12	6	12	5			12	0	12	0	12	0	12	4			12	0	12	0			12	0	12	1
		13	0	13	0	13	3	13	0	13	6			13	0	13	0	13	0	13	8	13	5			13	0	13	0	13	0	13	4			13	0	13	0			13	0	13	1
		14	0	14	0	14	3	14	1	14	6			14	0	14	0	14	0	14	8	14	5			14	0	14	0	14	0	14	4			14	1	14	0			14	0	14	1
		15	0	15	0	15	3	15	2	15	7			15	0	15	0	15	0	15	8	15	5			15	0	15	0	15	0	15	4			15	1	15	0			15	0	15	1
		16	0	16	0	16	4	16	4	16	10			16	0	16	0	16	0	16	9	16	6			16	0	16	0	16	0	16	4			16	1	16	0			16	0	16	1
		17	0	17	0	17	5	17	5	17	14			17	0	17	0	17	0	17	9	17	6			17	0	17	0	17	0	17	4			17	1	17	0			17	0	17	1
		18	0	18	0	18	5	18	5	18	16			18	0	18	0	18	0	18	11	18	7			18	0	18	0	18	0	18	4			18	1	18	0			18	0	18	1
		19	0	19	0	19	5	19	6	19	16			19	0	19	0	19	0	19	12	19	9			19	0	19	0	19	0	19	4			19	1	19	0			19	0	19	1
		20	0	20	0	20	6	20	8	20	19			20	0	20	0	20	1	20	13	20	9			20	0	20	0	20	0	20	4			20	1	20	0			20	0	20	3
		21	0	21	0	21	7	21	8	21	22			21	0	21	0	21	1	21	15	21	10			21	0	21	0	21	1	21	4			21	1	21	0			21	0	21	3
		22	0	22	0	22	8	22	11	22	24			22	0	22	0	22	2	22	16	22	10			22	1	22	0	22	1	22	4			22	1	22	0			22	0	22	3
		23	0	23	0	23	8	23	14	23	26			23	0	23	0	23	4	23	16	23	11			23	1	23	0	23	1	23	5			23	2	23	1			23	0	23	5
		24	0	24	0	24	8	24	14	24	27			24	0	24	0	24	5	24	16	24	12			24	1	24	0	24	1	24	7			24	2	24	1			24	0	24	5
		25	0	25	0	25	8	25	15	25	29			25	0	25	0	25	6	25	19	25	13			25	1	25	0	25	1	25	7			25	2	25	1			25	0	25	5
		26	0	26	1	26	9	26	18	26	34			26	0	26	0	26	6	26	21	26	15			26	1	26	0	26	2	26	7			26	2	26	2			26	0	26	5
		27	0	27	1	27	9	27	20	27	36			27	0	27	0	27	7	27	23	27	16			27	1	27	0	27	3	27	8			27	2	27	2			27	0	27	6
		28	0	28	1	28	10	28	24	28	41			28	0	28	0	28	8	28	25	28	16			28	1	28	0	28	3	28	8			28	2	28	3			28	0	28	8
		29	0	29	1	29	11	29	28	29	49			29	0	29	0	29	9	29	29	29	19			29	1	29	0	29	3	29	9			29	2	29	5			29	0	29	11
		30	0	30	1	30	12	30	33	30	52			30	0	30	0	30	9	30	30	30	20			30	1	30	0	30	3	30	9			30	2	30	5			30	0	30	12
		31	0	31	1	31	12	31	36	31	55			31	0	31	0	31	9	31	31	31	25			31	1	31	0	31	3	31	9			31	2	31	5			31	0	31	15
		32	0	32	1	32	13	32	38	32	56			32	0	32	0	32	9	32	32	32	28			32	1	32	0	32	3	32	9			32	3	32	5			32	0	32	16
		33	0	33	1	33	13	33	40	33	60			33	0	33	0	33	10	33	33	33	29			33	1	33	0	33	3	33	11			33	4	33	5			33	0	33	19
		34	0	34	1	34	15	34	41	34	61			34	0	34	0	34	11	34	35	34	30			34	1	34	0	34	3	34	11			34	4	34	6			34	0	34	23
		35	0	35	1	35	18	35	46	35	64			35	0	35	0	35	12	35	35	35	31			35	1	35	0	35	3	35	11			35	5	35	6			35	0	35	25
		36	0	36	2	36	20	36	47	36	69			36	0	36	0	36	12	36	41	36	34			36	2	36	0	36	4	36	12			36	5	36	6			36	0	36	32
		37	0	37	2	37	23	37	47	37	72			37	1	37	0	37	12	37	45	37	38			37	2	37	0	37	5	37	14			37	8	37	6			37	0	37	35
		38	0	38	2	38	23	38	51	38	76			38	1	38	0	38	13	38	46	38	39			38	2	38	0	38	7	38	15			38	9	38	7			38	0	38	41
		39	1	39	3	39	24	39	53	39	80			39	1	39	0	39	14	39	47	39	39			39	2	39	0	39	7	39	17			39	9	39	9			39	0	39	44
		40	1	40	3	40	25	40	58	40	82			40	1	40	0	40	15	40	50	40	40			40	2	40	0	40	7	40	19			40	11	40	12			40	0	40	49
		41	1	41	3	41	26	41	60	41	87			41	1	41	0	41	15	41	52	41	42			41	2	41	0	41	8	41	21			41	12	41	13			41	0	41	52
		42	1	42	3	42	27	42	63	42	90			42	1	42	0	42	16	42	54	42	48			42	2	42	0	42	9	42	23			42	12	42	13			42	0	42	58
		43	1	43	3	43	29	43	64	43	90			43	1	43	0	43	17	43	57	43	48			43	2	43	0	43	9	43	25			43	14	43	15			43	0	43	62
		44	2	44	3	44	30	44	68	44	96			44	1	44	0	44	18	44	60	44	55			44	2	44	0	44	9	44	29			44	16	44	16			44	0	44	63
		45	2	45	3	45	30	45	73	45	96			45	1	45	0	45	19	45	62	45	59			45	2	45	0	45	11	45	33			45	18	45	17			45	0	45	69
		46	2	46	4	46	32	46	77	46	103			46	1	46	0	46	23	46	65	46	63			46	2	46	0	46	11	46	36			46	19	46	20			46	0	46	71
		47	2	47	4	47	34	47	79	47	106			47	1	47	0	47	24	47	67	47	66			47	2	47	0	47	12	47	37			47	20	47	22			47	0	47	73
		48	2	48	4	48	35	48	80	48	109			48	1	48	0	48	24	48	70	48	67			48	2	48	0	48	14	48	37			48	21	48	27			48	0	48	75
		49	2	49	5	49	37	49	81	49	114			49	1	49	0	49	25	49	75	49	69			49	2	49	0	49	14	49	39			49	22	49	32			49	0	49	75
		50	2	50	5	50	38	50	82	50	119			50	1	50	0	50	26	50	82	50	73			50	2	50	0	50	14	50	41			50	24	50	33			50	0	50	85
		51	2	51	5	51	39	51	84	51	128			51	1	51	0	51	27	51	87	51	79			51	2	51	0	51	15	51	42			51	26	51	38			51	0	51	87
		52	2	52	5	52	40	52	86	52	133			52	1	52	1	52	27	52	89	52	84			52	2	52	0	52	15	52	44			52	29	52	40			52	0	52	93
		53	2	53	6	53	41	53	86	53	133			53	1	53	1	53	30	53	93	53	86			53	2	53	0	53	16	53	44			53	31	53	46			53	0	53	96
		54	2	54	7	54	42	54	89	54	140			54	1	54	1	54	32	54	96	54	90			54	2	54	0	54	16	54	47			54	31	54	49			54	1	54	105
		55	2	55	7	55	43	55	94	55	145			55	2	55	1	55	33	55	98	55	93			55	2	55	0	55	16	55	48			55	33	55	53			55	2	55	106
		56	2	56	7	56	43	56	97	56	151			56	3	56	1	56	34	56	99	56	95			56	2	56	0	56	17	56	48			56	33	56	56			56	3	56	111
		57	2	57	7	57	43	57	99	57	156			57	3	57	1	57	35	57	103	57	98			57	2	57	0	57	17	57	50			57	33	57	57			57	3	57	113
		58	2	58	7	58	44	58	101	58	157			58	3	58	1	58	35	58	107	58	101			58	2	58	0	58	18	58	54			58	37	58	77			58	3	58	119
		59	2	59	7	59	45	59	105	59	160			59	3	59	1	59	37	59	109	59	106			59	2	59	0	59	18	59	58			59	37	59	79			59	3	59	119
		60	2	60	7	60	48	60	106	60	163			60	3	60	1	60	40	60	113	60	110			60	2	60	0	60	18	60	60			60	46	60	96			60	3	60	127
		61	2	61	7	61	49	61	108	61	164			61	3	61	1	61	43	61	116	61	112			61	2	61	0	61	19	61	60			61	46	61	96			61	3	61	128
		62	2	62	7	62	51	62	109	62	169			62	3	62	1	62	43	62	119	62	118			62	2	62	0	62	25	62	63			62	47	62	103			62	3	62	135
		63	2	63	7	63	52	63	111	63	172			63	3	63	1	63	43	63	120	63	122			63	2	63	0	63	25	63	65			63	47	63	103			63	4	63	136
		64	2	64	7	64	52	64	114	64	173			64	3	64	1	64	44	64	125	64	125			64	2	64	0	64	26	64	65			64	48	64	115			64	4	64	143
		65	2	65	7	65	53	65	116	65	176			65	3	65	1	65	45	65	129	65	129			65	2	65	0	65	26	65	66			65	48	65	115			65	4	65	144
		66	2	66	8	66	53	66	119	66	180			66	3	66	1	66	45	66	135	66	135			66	2	66	0	66	27	66	69			66	51	66	125			66	4	66	146
		67	2	67	8	67	54	67	120	67	186			67	3	67	1	67	45	67	136	67	139			67	2	67	0	67	28	67	70			67	51	67	125			67	4	67	146
		68	2	68	8	68	55	68	122	68	192			68	3	68	1	68	46	68	136	68	142			68	2	68	0	68	31	68	71			68	52	68	135			68	5	68	151
		69	2	69	8	69	55	69	122	69	198			69	3	69	1	69	46	69	139	69	144			69	2	69	0	69	31	69	72			69	52	69	135			69	6	69	152
		70	2	70	8	70	56	70	124	70	202			70	3	70	1	70	47	70	141	70	156			70	2	70	0	70	31	70	72			70	56	70	140			70	6	70	155
		71	3	71	8	71	58	71	127	71	205			71	3	71	1	71	52	71	147	71	162			71	2	71	0	71	32	71	73			71	56	71	141			71	7	71	155
		72	3	72	8	72	62	72	127	72	206			72	3	72	1	72	55	72	147	72	167			72	2	72	0	72	35	72	75			72	59	72	153			72	7	72	161
		73	3	73	9	73	62	73	131	73	208			73	3	73	1	73	56	73	150	73	168			73	2	73	0	73	35	73	76			73	59	73	153			73	8	73	161
		74	3	74	9	74	63	74	134	74	211			74	3	74	2	74	57	74	153	74	173			74	2	74	0	74	38	74	77			74	61	74	162			74	8	74	168
		75	3	75	9	75	64	75	138	75	216			75	3	75	2	75	59	75	156	75	176			75	2	75	0	75	38	75	78			75	61	75	162			75	8	75	170
		76	3	76	9	76	66	76	140	76	220			76	3	76	2	76	59	76	160	76	178			76	2	76	0	76	38	76	80			76	63	76	171			76	9	76	172
		77	3	77	10	77	66	77	141	77	224			77	3	77	3	77	62	77	164	77	182			77	2	77	0	77	38	77	82			77	63	77	171			77	10	77	172
		78	3	78	10	78	67	78	143	78	227			78	3	78	3	78	62	78	164	78	184			78	2	78	0	78	38	78	84			78	66	78	179			78	10	78	179
		79	3	79	10	79	68	79	145	79	227			79	3	79	3	79	63	79	166	79	185			79	2	79	0	79	38	79	85			79	66	79	179			79	10	79	180
		80	3	80	10	80	68	80	147	80	233			80	4	80	3	80	63	80	168	80	192			80	2	80	0	80	38	80	85			80	75	80	186			80	11	80	185
		81	3	81	10	81	68	81	149	81	239			81	4	81	3	81	63	81	168	81	196			81	2	81	0	81	39	81	86			81	76	81	187			81	13	81	187
		82	3	82	11	82	69	82	151	82	241			82	4	82	3	82	64	82	170	82	198			82	2	82	0	82	39	82	89			82	80	82	191			82	14	82	191
		83	3	83	11	83	69	83	153	83	244			83	4	83	4	83	64	83	175	83	200			83	2	83	0	83	39	83	92			83	80	83	191			83	14	83	192
		84	3	84	11	84	69	84	156	84	246			84	4	84	4	84	66	84	177	84	202			84	2	84	0	84	39	84	94			84	83	84	194			84	14	84	197
		85	3	85	11	85	70	85	158	85	249			85	4	85	5	85	66	85	180	85	204			85	2	85	0	85	39	85	94			85	84	85	194			85	14	85	197
		86	3	86	11	86	72	86	160	86	252			86	4	86	5	86	69	86	182	86	205			86	2	86	0	86	41	86	94			86	89	86	201			86	14	86	202
		87	3	87	11	87	72	87	162	87	253			87	4	87	5	87	70	87	183	87	207			87	2	87	0	87	42	87	96			87	89	87	201			87	14	87	203
		88	3	88	11	88	75	88	163	88	257			88	4	88	5	88	72	88	185	88	208			88	2	88	0	88	42	88	100			88	90	88	208			88	14	88	209
		89	3	89	12	89	75	89	164	89	260			89	4	89	5	89	73	89	186	89	210			89	2	89	0	89	42	89	106			89	90	89	208			89	14	89	211
		90	3	90	12	90	76	90	164	90	265			90	4	90	5	90	74	90	187	90	211			90	2	90	0	90	42	90	106			90	92	90	212			90	16	90	218
		91	3	91	12	91	76	91	170	91	268			91	5	91	5	91	75	91	187	91	211			91	2	91	0	91	43	91	107			91	92	91	212			91	16	91	218
		92	3	92	12	92	77	92	171	92	271			92	5	92	6	92	75	92	189	92	213			92	2	92	0	92	43	92	107			92	94	92	220			92	17	92	222
		93	3	93	12	93	78	93	173	93	274			93	5	93	6	93	75	93	190	93	213			93	2	93	0	93	44	93	110			93	94	93	221			93	18	93	223
		94	3	94	14	94	79	94	177	94	278			94	7	94	8	94	76	94	192	94	214			94	2	94	0	94	45	94	110			94	97	94	227			94	18	94	226
		95	3	95	15	95	79	95	180	95	282			95	7	95	8	95	76	95	192	95	215			95	2	95	0	95	45	95	110			95	97	95	228			95	18	95	226
		96	3	96	15	96	79	96	182	96	282			96	7	96	8	96	77	96	193	96	216			96	3	96	0	96	46	96	111			96	101	96	233			96	18	96	227
		97	3	97	15	97	81	97	183	97	286			97	7	97	8	97	77	97	195	97	217			97	3	97	0	97	46	97	113			97	101	97	233			97	20	97	229
		98	3	98	15	98	81	98	183	98	292			98	7	98	8	98	77	98	198	98	218			98	3	98	0	98	47	98	115			98	103	98	236			98	20	98	232
		99	3	99	15	99	81	99	185	99	293			99	7	99	8	99	78	99	200	99	219			99	3	99	0	99	47	99	117			99	103	99	236			99	20	99	232
		100	3	100	15	100	82	100	185	100	295			100	7	100	8	100	80	100	200	100	224			100	3	100	0	100	47	100	118			100	105	100	239			100	21	100	235
		101	3	101	15	101	82	101	186	101	298			101	7	101	8	101	81	101	201	101	224			101	3	101	0	101	47	101	120			101	105	101	239			101	21	101	235
		102	3	102	15	102	82	102	190	102	300			102	7	102	9	102	81	102	203	102	224			102	3	102	0	102	47	102	120			102	106	102	244			102	21	102	240
		103	4	103	15	103	82	103	190	103	303			103	7	103	9	103	82	103	206	103	225			103	3	103	0	103	47	103	120			103	106	103	244			103	21	103	241
		104	4	104	15	104	82	104	190	104	306			104	7	104	9	104	82	104	208	104	228			104	3	104	0	104	48	104	122			104	110	104	251			104	22	104	243
		105	4	105	15	105	83	105	190	105	311			105	7	105	9	105	82	105	209	105	230			105	3	105	0	105	48	105	123			105	110	105	251			105	23	105	244
		106	4	106	15	106	84	106	190	106	311			106	7	106	10	106	83	106	212	106	231			106	3	106	0	106	48	106	124			106	112	106	256			106	24	106	248
		107	4	107	15	107	84	107	193	107	314			107	7	107	10	107	83	107	214	107	232			107	3	107	0	107	48	107	124			107	112	107	256			107	24	107	248
		108	4	108	15	108	86	108	194	108	319			108	7	108	10	108	84	108	214	108	234			108	3	108	0	108	48	108	125			108	113	108	259			108	24	108	249
		109	4	109	15	109	87	109	198	109	323			109	7	109	11	109	84	109	215	109	234			109	3	109	1	109	49	109	128			109	114	109	259			109	25	109	251
		110	4	110	15	110	87	110	201	110	325			110	7	110	11	110	84	110	219	110	236			110	3	110	1	110	50	110	128			110	117	110	261			110	27	110	255
		111	4	111	16	111	87	111	202	111	327			111	7	111	11	111	85	111	220	111	236			111	3	111	1	111	50	111	131			111	117	111	261			111	27	111	255
		112	4	112	16	112	87	112	203	112	330			112	7	112	11	112	85	112	222	112	238			112	3	112	2	112	50	112	134			112	119	112	267			112	27	112	258
		113	4	113	16	113	87	113	204	113	331			113	7	113	12	113	85	113	223	113	240			113	3	113	2	113	50	113	134			113	119	113	268			113	27	113	258
		114	4	114	16	114	88	114	205	114	334			114	7	114	12	114	86	114	224	114	241			114	3	114	2	114	50	114	136			114	119	114	272			114	27	114	262
		115	4	115	17	115	90	115	206	115	336			115	7	115	12	115	88	115	228	115	241			115	3	115	2	115	50	115	137			115	119	115	272			115	27	115	262
		116	4	116	17	116	91	116	208	116	340			116	7	116	12	116	89	116	230	116	242			116	3	116	2	116	51	116	137			116	123	116	277			116	27	116	268
		117	4	117	17	117	92	117	210	117	342			117	7	117	12	117	91	117	231	117	242			117	3	117	2	117	51	117	139			117	123	117	277			117	27	117	268
		118	4	118	17	118	93	118	211	118	345			118	8	118	13	118	94	118	232	118	242			118	3	118	2	118	52	118	141			118	125	118	281			118	28	118	272
		119	4	119	17	119	94	119	212	119	345			119	8	119	13	119	95	119	232	119	243			119	4	119	2	119	54	119	142			119	125	119	281			119	28	119	272
		120	4	120	17	120	95	120	213	120	347			120	8	120	13	120	96	120	233	120	244			120	4	120	2	120	54	120	142			120	128	120	283			120	28	120	275
		121	4	121	17	121	96	121	213	121	349			121	8	121	13	121	96	121	233	121	245			121	4	121	2	121	55	121	142			121	128	121	283			121	28	121	277
		122	4	122	17	122	97	122	214	122	351			122	8	122	14	122	97	122	233	122	245			122	4	122	2	122	55	122	143			122	129	122	287			122	28	122	280
		123	4	123	17	123	97	123	216	123	353			123	8	123	16	123	101	123	236	123	247			123	4	123	3	123	55	123	143			123	129	123	287			123	28	123	281
		124	4	124	17	124	98	124	217	124	356			124	8	124	16	124	103	124	238	124	247			124	4	124	3	124	55	124	145			124	131	124	290			124	29	124	282
		125	4	125	17	125	98	125	219	125	358			125	8	125	16	125	104	125	238	125	249			125	4	125	3	125	57	125	146			125	131	125	290			125	29	125	283
		126	4	126	17	126	98	126	221	126	360			126	8	126	16	126	105	126	238	126	252			126	4	126	3	126	57	126	148			126	132	126	294			126	29	126	287
		127	4	127	17	127	99	127	221	127	361			127	8	127	17	127	106	127	238	127	252			127	4	127	3	127	57	127	148			127	132	127	294			127	29	127	288
		128	4	128	17	128	99	128	223	128	362			128	8	128	17	128	107	128	240	128	255			128	4	128	3	128	57	128	150			128	134	128	295			128	30	128	290
		129	4	129	17	129	100	129	223	129	362			129	8	129	17	129	109	129	241	129	256			129	4	129	3	129	58	129	153			129	134	129	295			129	30	129	291
		130	4	130	17	130	100	130	225	130	364			130	8	130	17	130	109	130	241	130	256			130	4	130	3	130	58	130	153			130	135	130	295			130	30	130	296
		131	4	131	17	131	100	131	227	131	365			131	8	131	17	131	110	131	241	131	257			131	4	131	3	131	59	131	158			131	135	131	295			131	30	131	297
		132	4	132	17	132	102	132	229	132	365			132	8	132	17	132	111	132	241	132	259			132	4	132	3	132	60	132	159			132	137	132	296			132	32	132	298
		133	4	133	17	133	102	133	230	133	366			133	9	133	17	133	111	133	241	133	260			133	4	133	3	133	61	133	160			133	137	133	296			133	32	133	299
		134	4	134	17	134	103	134	230					134	9	134	17	134	111	134	241	134	261			134	4	134	3	134	62	134	161			134	138	134	298			134	33	134	299
		135	4	135	17	135	103	135	230					135	9	135	17	135	111	135	242	135	262			135	4	135	4	135	62	135	161			135	138	135	298			135	33	135	299
		136	4	136	17	136	104	136	230					136	9	136	18	136	112	136	244	136	263			136	4	136	4	136	63	136	162			136	139	136	300			136	33	136	303
		137	4	137	17	137	104	137	231					137	9	137	18	137	112	137	246	137	265			137	4	137	4	137	63	137	165			137	139	137	301			137	33	137	303
		138	4	138	17	138	104							138	9	138	19	138	113	138	247	138	266			138	4	138	4	138	65	138	166			138	142	138	302			138	33	138	304
		139	4	139	17	139	105							139	9	139	19	139	113	139	248	139	266			139	4	139	4	139	66	139	166			139	142	139	302			139	33	139	306
		140	4	140	17	140	105							140	9	140	19	140	114	140	249	140	268			140	4	140	5	140	67	140	168			140	144					140	35	140	310
		141	4	141	17	141	105							141	9	141	19	141	114	141	250	141	269			141	4	141	5	141	67	141	168			141	145					141	35	141	311
		142	4	142	17	142	106							142	9	142	19	142	116	142	250	142	269			142	4	142	5	142	68	142	168			142	146					142	37	142	312
		143	4	143	17	143	109							143	9	143	19	143	116	143	250	143	271			143	4	143	5	143	68	143	170			143	146					143	37	143	312
		144	4	144	17	144	109							144	9	144	19	144	116	144	250	144	272			144	4	144	5	144	68	144	170			144	148					144	37	144	313
		145	4	145	17	145	109							145	9	145	19	145	118	145	251	145	274			145	4	145	5	145	69	145	171			145	148					145	37	145	313
		146	4	146	17	146	109							146	9	146	19	146	118	146	251	146	275			146	5	146	5	146	69	146	172			146	149					146	38	146	315
		147	4	147	17	147	110							147	9	147	19	147	118	147	252	147	275			147	5	147	5	147	69	147	174			147	149					147	38	147	315
		148	4	148	17	148	110							148	9	148	19	148	118	148	253	148	277			148	5	148	5	148	70	148	174			148	150					148	38	148	315
		149	4	149	17	149	111							149	9	149	19	149	119	149	253	149	278			149	5	149	5	149	70	149	177			149	150					149	38	149	317
		150	4	150	17	150	113							150	9	150	19	150	119	150	254	150	279			150	5	150	5	150	70	150	178			150	150					150	38	150	321
		151	4	151	17	151	113							151	9	151	19	151	119	151	256	151	279			151	5	151	5	151	70	151	178			151	151					151	38	151	321
		152	4	152	17	152	113							152	9	152	19	152	119	152	256	152	280			152	5	152	5	152	71	152	178			152	152					152	39	152	325
		153	4	153	17	153	113							153	9	153	19	153	119	153	257	153	280			153	5	153	5	153	71	153	178			153	152					153	39	153	325
		154	4	154	17	154	113							154	9	154	19	154	119	154	258	154	280			154	5	154	5	154	71	154	178			154	153					154	39	154	327
		155	4	155	17	155	113							155	9	155	19	155	119	155	259	155	280			155	5	155	6	155	71	155	178			155	153					155	39	155	327
		156	4	156	18	156	113							156	9	156	19	156	119	156	261	156	281			156	5	156	6	156	72	156	178			156	155					156	39	156	329
		157	4	157	18	157	113							157	9	157	19	157	120	157	262	157	281			157	5	157	6	157	72	157	178			157	155					157	39	157	329
		158	4	158	18	158	113							158	9	158	19	158	120	158	263	158	281			158	5	158	6	158	73	158	178			158	157					158	39	158	332
		159	4	159	18	159	113							159	9	159	19	159	121	159	263	159	282			159	5	159	7	159	74	159	179			159	157					159	39	159	332
		160	4	160	18	160	113							160	9	160	19	160	123	160	264	160	283			160	5	160	7	160	74	160	181			160	158					160	40	160	335
		161	4	161	18	161	114							161	9	161	19	161	123	161	264	161	285			161	5	161	7	161	74	161	183			161	158					161	40	161	335
		162	4	162	18	162	116							162	9	162	19	162	124	162	264	162	286			162	5	162	7	162	75	162	183			162	160					162	40	162	338
		163	4	163	18	163	116							163	9	163	20	163	127	163	264	163	287			163	5	163	7	163	75	163	183			163	160					163	40	163	338
		164	4	164	18	164	116							164	9	164	21	164	127	164	265	164	288			164	6	164	7	164	75	164	183			164	160					164	41	164	339
		165	4	165	18	165	116							165	9	165	21	165	127	165	265	165	288			165	6	165	9	165	75	165	184			165	160					165	41	165	339
		166	4	166	18	166	116							166	9	166	21	166	128	166	265	166	289			166	6	166	9	166	75	166	186			166	160					166	41	166	341
		167	4	167	18	167	116							167	9	167	21	167	128	167	265	167	290			167	6	167	9	167	75	167	188			167	160					167	41	167	341
		168	4	168	18	168	118							168	9	168	21	168	129	168	265	168	290			168	6	168	9	168	75	168	188			168	161					168	41	168	341
		169	4	169	18	169	118							169	9	169	21	169	130	169	266	169	291			169	6	169	9	169	77	169	189			169	161					169	41	169	341
		170	4	170	18									170	9	170	21	170	131	170	267	170	292			170	6	170	9	170	77	170	189			170	163					170	41	170	344
		171	4	171	18									171	10	171	21	171	131	171	267	171	293			171	6	171	9	171	77	171	189			171	163					171	41	171	344
		172	4	172	18									172	10	172	21	172	132	172	267	172	294			172	7	172	9	172	77	172	192			172	163					172	42	172	350
		173	4	173	18									173	10	173	21	173	132	173	267	173	295			173	7	173	9	173	77	173	192			173	163					173	42	173	352
		174	4	174	18									174	11	174	21	174	134	174	268	174	295			174	7	174	10	174	77	174	193			174	163					174	44	174	353
		175	4	175	19									175	11	175	22	175	135	175	268	175	295			175	7	175	10	175	78	175	194			175	163					175	44	175	353
		176	4	176	19									176	11	176	22	176	135	176	268	176	296			176	7	176	10	176	78	176	195			176	167					176	44	176	354
		177	4	177	19									177	11	177	22	177	135	177	268	177	296			177	7	177	10	177	80	177	196			177	167					177	44	177	354
		178	4	178	19									178	11	178	22	178	135	178	269	178	297			178	7	178	10	178	81	178	197			178	168					178	45	178	356
		179	4	179	19									179	11	179	22	179	135	179	270	179	298			179	7	179	10	179	82	179	198			179	168					179	46	179	357
		180	4	180	19									180	11	180	22	180	136	180	270	180	298			180	7	180	10	180	85	180	199			180	169					180	46	180	361
		181	4	181	19									181	11	181	22	181	137	181	270	181	298			181	7	181	10	181	85	181	199			181	169					181	46	181	361
		182	4	182	19									182	11	182	23	182	137	182	271	182	298			182	7	182	10	182	85	182	200			182	169					182	46	182	363
		183	4	183	19									183	12	183	23	183	137	183	272	183	298			183	7	183	10	183	87	183	200			183	169					183	46	183	363
		184	4	184	19									184	12	184	24	184	140	184	272	184	298			184	7	184	10	184	88	184	202			184	170					184	47	184	363
		185	4	185	19									185	12	185	24	185	141	185	272	185	299			185	7	185	10	185	88	185	202			185	170					185	47	185	363
		186	4	186	19									186	12	186	24	186	141	186	273	186	300			186	7	186	10	186	89	186	202			186	172					186	47	186	363
		187	4	187	19									187	12	187	25	187	141	187	273	187	300			187	7	187	10	187	89	187	202			187	172					187	47	187	363
		188	4	188	19									188	12	188	25	188	141	188	273	188	300			188	7	188	10	188	89	188	203			188	172					188	47	188	364
		189	4	189	19									189	13	189	25	189	141	189	273	189	300			189	7	189	10	189	90	189	205			189	172					189	47	189	364
		190	4	190	19									190	13	190	25	190	141	190	273	190	300			190	7	190	10	190	90	190	207			190	172					190	48	190	366
		191	4	191	19									191	13	191	25	191	142	191	275	191	302			191	7	191	10	191	91	191	207			191	172					191	49	191	366
		192	4	192	19									192	14	192	25	192	143	192	275	192	303			192	7	192	10	192	91	192	208			192	175					192	50	192	366
		193	4	193	19									193	14	193	25	193	143	193	275	193	303			193	7	193	10	193	92	193	208			193	175					193	50	193	367
		194	4	194	20									194	14	194	25	194	143	194	275	194	304			194	7	194	10	194	92	194	209			194	175					194	50	194	367
		195	4	195	20									195	14	195	25	195	143	195	275	195	306			195	7	195	10	195	92	195	210			195	175					195	50	195	367
		196	4	196	20									196	14	196	25	196	143	196	275	196	306			196	7	196	10	196	94	196	210			196	176					196	50	196	368
				197	20									197	14	197	25	197	143	197	275	197	306			197	7	197	10	197	94	197	211			197	176					197	50	197	368
				198	20									198	14	198	25	198	143	198	275	198	306			198	7	198	10	198	95	198	212			198	179					198	50	198	369
				199	21									199	14	199	25	199	143	199	275	199	306			199	7	199	10	199	95	199	214			199	179					199	50	199	369
				200	21									200	15	200	25	200	143	200	275	200	306			200	7	200	10	200	95	200	215			200	179					200	51
				201	21									201	15	201	25	201	143	201	275	201	306			201	7	201	10	201	96	201	217			201	179					201	51
				202	21									202	16	202	25	202	143	202	275	202	306			202	7	202	10	202	97	202	219			202	182					202	51
				203	21									203	16	203	25	203	143	203	275	203	306			203	7	203	10	203	98	203	219			203	182					203	51
				204	22									204	16	204	25	204	144	204	275	204	307			204	7	204	10	204	98	204	219			204	182					204	51
				205	22									205	16	205	25	205	145	205	275	205	308			205	8	205	10	205	100	205	219			205	183					205	51
														206	16	206	25	206	145	206	275	206	308			206	8	206	10	206	100	206	219			206	183					206	51
														207	16	207	25	207	145	207	275	207	308			207	8	207	10	207	100	207	220			207	183					207	51
														208	16	208	26	208	146	208	275	208	308			208	8	208	10	208	101	208	220			208	184					208	51
														209	16	209	26	209	146	209	275	209	308			209	8	209	10	209	101	209	221			209	184					209	51
														210	16	210	26	210	146	210	275	210	308			210	8	210	10	210	102	210	221			210	186					210	51
														211	16	211	26	211	146	211	275	211	308			211	8	211	11	211	102	211	221			211	187					211	51
														212	16	212	27	212	146	212	275	212	308			212	8	212	11	212	105	212	223			212	187					212	51
														213	16	213	27	213	146	213	275	213	310			213	8	213	11	213	106	213	225			213	187					213	51
														214	16	214	27	214	146	214	276	214	310			214	8	214	11	214	106	214	225			214	189					214	52
														215	16	215	27	215	146	215	276	215	311			215	8	215	11	215	106	215	225			215	189					215	52
														216	16	216	27	216	146	216	276	216	311			216	8	216	11	216	106	216	226			216	189					216	54
														217	16	217	27	217	146	217	276	217	311			217	8	217	11	217	106	217	227			217	190					217	54
														218	16	218	27	218	147	218	276	218	311			218	8	218	11	218	106	218	227			218	190					218	55
														219	16	219	27	219	148	219	276	219	311			219	8	219	11	219	106	219	228			219	190					219	55
														220	16	220	27	220	149	220	277	220	311			220	8	220	11	220	106	220	228			220	190					220	55
														221	16	221	27	221	149	221	277	221	311			221	8	221	11	221	106	221	229			221	190					221	55
														222	16	222	27	222	149			222	311			222	8	222	11	222	106	222	229			222	193					222	55
														223	16	223	28	223	149			223	313			223	8	223	11	223	107	223	229			223	193					223	55
														224	16	224	28	224	150			224	313			224	8	224	11	224	108	224	229			224	194					224	55
														225	16	225	28	225	150			225	313			225	8	225	11	225	108	225	230			225	194					225	55
														226	16	226	28	226	150			226	313			226	8	226	11	226	108	226	231			226	196					226	55
														227	16	227	28	227	151			227	313			227	8	227	11	227	108	227	231			227	196					227	55
														228	16	228	29	228	151			228	313			228	8	228	11	228	108	228	233			228	196					228	56
														229	16	229	29					229	313			229	8	229	11	229	109	229	233			229	196					229	56
														230	16	230	29					230	314			230	8	230	11	230	109	230	233			230	197					230	57
														231	16	231	29									231	8	231	11	231	109	231	233			231	197					231	57
														232	16	232	29									232	8	232	12	232	109	232	234			232	199					232	57
														233	16	233	29									233	8	233	12	233	110	233	235			233	199					233	57
														234	16	234	29									234	8	234	12	234	110	234	236			234	199					234	59
														235	16	235	29									235	9	235	12	235	112	235	236			235	199					235	59
														236	16	236	29									236	9	236	12	236	112	236	236			236	201					236	60
														237	16	237	30									237	9	237	12	237	112	237	237			237	201					237	60
														238	16	238	30									238	9	238	12	238	113	238	237			238	201					238	61
														239	16	239	30									239	9	239	12	239	113	239	237			239	201					239	61
														240	16	240	30									240	9	240	12	240	113	240	238			240	202					240	61
														241	16	241	30									241	9	241	12	241	115	241	239			241	202					241	61
														242	16	242	30									242	9	242	12	242	116	242	240									242	61
														243	16	243	30									243	9	243	12	243	117	243	242									243	61
														244	16	244	30									244	9	244	12	244	117	244	242									244	63
														245	17	245	30									245	9	245	12	245	118	245	243									245	63
														246	17	246	30									246	9	246	13	246	118	246	246									246	64
														247	17	247	30									247	9	247	13	247	118	247	248									247	64
														248	17	248	30									248	9	248	13	248	118	248	248									248	64
														249	17	249	30									249	9	249	13	249	118	249	248									249	64
														250	17	250	31									250	9	250	13	250	118	250	250									250	64
														251	18	251	31									251	9	251	13	251	119	251	250									251	64
														252	18	252	31									252	9	252	14	252	119	252	250									252	64
														253	19	253	31									253	9	253	14	253	119	253	250									253	64
														254	19	254	31									254	9	254	14	254	119	254	250									254	64
														255	19	255	31									255	9	255	14	255	119	255	250									255	64
														256	19	256	31									256	9	256	14	256	119	256	250									256	66
														257	19	257	31									257	9	257	14	257	120	257	252									257	66
														258	20	258	31									258	9	258	14	258	120	258	252									258	66
														259	21	259	31									259	9	259	14	259	120	259	252									259	66
														260	21	260	31									260	9	260	14	260	120	260	252									260	66
														261	21	261	31									261	9	261	14	261	121	261	252									261	66
														262	21	262	31									262	9	262	14	262	121	262	252									262	66
														263	21	263	31									263	9	263	14	263	121	263	252									263	66
														264	21	264	31									264	9	264	14	264	121	264	252									264	67
														265	21	265	31									265	9	265	14	265	121	265	252									265	67
														266	22	266	31									266	9	266	14	266	122	266	253									266	67
														267	22	267	31									267	9	267	14	267	122	267	253									267	67
														268	22	268	32									268	9	268	14	268	122	268	253									268	67
														269	22	269	32									269	9	269	14	269	122	269	253									269	67
														270	22	270	32									270	9	270	14	270	122	270	253									270	67
														271	22	271	33									271	9	271	14	271	122	271	254									271	67
														272	22	272	33									272	9	272	14	272	123	272	254									272	68
														273	22	273	34									273	9	273	14	273	123	273	255									273	68
														274	22	274	34									274	9	274	14	274	123	274	256									274	69
														275	23	275	34									275	9	275	14	275	123	275	256									275	69
														276	23	276	34									276	9	276	14	276	124	276	256									276	69
														277	23	277	34									277	9	277	14	277	124	277	257									277	69
														278	24	278	34									278	9	278	14	278	124	278	257									278	69
														279	24	279	34									279	9	279	14	279	124	279	258									279	69
														280	25	280	34									280	9	280	14	280	125	280	259									280	70
														281	25	281	34									281	9	281	14	281	125	281	259									281	70
														282	25	282	34									282	9	282	14	282	125	282	259									282	70
														283	27	283	35									283	9	283	14	283	125	283	260									283	70
														284	27	284	35									284	9	284	14	284	125	284	260									284	70
														285	27	285	35									285	9	285	14	285	125	285	260									285	70
														286	27	286	35									286	9	286	14	286	125	286	261									286	70
														287	27	287	35									287	9	287	14	287	125	287	262									287	70
														288	27	288	35									288	9	288	14	288	125	288	262									288	71
														289	27	289	35									289	9	289	14	289	125	289	262									289	72
														290	27	290	35									290	9	290	14	290	125	290	264									290	73
														291	27	291	35									291	9	291	14	291	126	291	264									291	73
														292	27	292	35									292	9	292	14	292	126	292	264									292	73
														293	28	293	35									293	9	293	14	293	127	293	264									293	73
														294	28	294	35									294	9	294	14	294	128	294	265									294	74
														295	28	295	35									295	9	295	14	295	128	295	265									295	74
														296	28	296	35									296	9	296	14	296	128	296	266									296	75
														297	28	297	35									297	9	297	14	297	128	297	266									297	75
														298	28	298	35									298	9	298	14	298	128	298	266									298	75
														299	28	299	35									299	9	299	14	299	128	299	266									299	75
														300	28	300	35									300	9	300	14	300	128	300	267									300	75
														301	28	301	35									301	9	301	14	301	128	301	267									301	75
														302	28	302	35									302	9	302	14	302	129	302	267									302	75
														303	28	303	35									303	9	303	14	303	129	303	267									303	75
														304	28	304	35									304	9	304	14	304	129	304	267									304	76
														305	28	305	35									305	9	305	14	305	129	305	268									305	76
														306	28	306	35									306	9	306	14	306	129	306	269									306	76
														307	28	307	35									307	9	307	14	307	129	307	269									307	77
														308	28	308	35									308	9	308	14	308	129	308	269									308	77
														309	28	309	35									309	9	309	14	309	129	309	269									309	77
														310	28	310	35									310	9	310	14	310	129	310	269									310	78
														311	28	311	35									311	9	311	14	311	129	311	269									311	78
														312	28	312	35									312	9	312	14	312	129	312	270									312	78
														313	28	313	35									313	9	313	14	313	129	313	270									313	78
														314	28	314	35									314	9	314	14	314	130	314	270									314	78
														315	28	315	35									315	9	315	14	315	130	315	270									315	78
														316	28	316	35									316	9	316	14	316	130	316	270									316	78
														317	29	317	35									317	9	317	14	317	130	317	270									317	78
														318	29	318	36									318	9	318	14	318	130	318	270									318	78
														319	29	319	36									319	9	319	14	319	130	319	270									319	78
														320	30	320	36									320	9	320	14	320	130	320	270									320	78
														321	30	321	36									321	9	321	14	321	130	321	270									321	79
														322	30	322	36									322	9	322	14	322	130	322	270									322	79
														323	30	323	36									323	9	323	14	323	130	323	270									323	79
														324	30	324	36									324	9	324	14	324	130	324	270									324	79
														325	30	325	36									325	9	325	14	325	130	325	270									325	79
														326	30	326	36									326	9	326	14	326	130	326	270									326	79
														327	30	327	36									327	9	327	14	327	130	327	270									327	79
														328	30	328	36									328	9	328	14	328	131	328	270									328	79
														329	30	329	36									329	9	329	14	329	131	329	270									329	79
														330	30	330	36									330	9	330	14	330	132	330	270									330	79
														331	30	331	36									331	9	331	14	331	132	331	270									331	79
														332	30	332	36									332	9	332	14			332	270									332	79
														333	30	333	36									333	10	333	14			333	270									333	79
														334	30	334	36									334	10	334	14			334	271									334	79
														335	30	335	36											335	14			335	271									335	79
														336	30	336	36											336	14													336	79
														337	30	337	36											337	15													337	79
														338	30	338	37											338	15													338	79
														339	30	339	37											339	15													339	79
														340	30													340	15													340	80
														341	30													341	15													341	80
														342	30													342	15													342	80
														343	30													343	15													343	80
														344	30													344	16													344	80
														345	30													345	16													345	80
														346	30													346	16													346	80
														347	30													347	16													347	80
														348	30													348	16													348	80
														349	30													349	16													349	80
														350	30													350	16													350	80
														351	31													351	16													351	80
														352	31													352	16													352	80
														353	31													353	16													353	80
														354	31													354	16													354	81
														355	31													355	16													355	81
														356	31													356	16													356	81
														357	31													357	16													357	81
														358	31													358	16													358	81
														359	31													359	16													359	81
														360	31													360	16													360	82
														361	31													361	16													361	82
														362	31													362	16													362	82
														363	31													363	16													363	82
														364	31													364	16													364	82
														365	31													365	16													365	82
														366	31													366	16													366	82
														367	31													367	17													367	82
														368	31													368	17													368	82
														369	31													369	17													369	82
														370	31													370	17													370	82
																												371	17													371	82
																												372	17													372	82
																												373	17													373	82
																												374	17													374	82
																												375	17													375	82
																												376	17													376	82
																												377	17													377	82
																												378	17													378	82
																												379	17													379	82
																												380	17													380	82
																												381	17													381	82
																												382	17													382	84
																												383	18													383	84
																												384	18													384	84
																												385	19													385	84
																												386	19													386	84
																												387	19													387	84
																												388	19													388	84
																												389	19													389	84
																												390	19													390	84
																												391	19													391	84
																												392	19													392	84
																												393	19													393	84
																												394	19													394	84
																												395	19													395	84
																												396	19													396	84
																												397	19													397	84
																												398	19													398	85
																												399	19													399	85
																												400	19													400	85
																												401	19													401	85
																												402	19													402	85
																												403	19													403	85
																												404	19													404	85
																												405	19													405	85
																												406	19													406	85
																												407	19													407	85
																												408	19													408	85
																												409	19													409	85
																												410	19													410	85
																												411	19													411	85
																												412	20													412	85
																												413	20													413	85
																												414	20													414	85
																												415	20													415	85
																												416	20													416	85
																												417	20													417	85
																												418	20													418	85
																												419	20													419	85
																												420	20													420	85
																												421	20													421	85
																												422	20													422	85
																												423	20													423	85
																												424	20													424	85
																												425	20													425	85
																												426	21													426	85
																												427	21													427	85
																																										428	85
																																										429	85
																																										430	86
																																										431	86

## Sheet: Figure 7E
g-TuRC+XMAP215 nucleation assay - power law analysis (normalized data)
Data set 1
Tubulin concentration (uM)	Normalized rate of nucleation
1.68	0.0239
2.45	0.1809
3.5	1
5.25	2.2096
7	3.6132
Data set 2
Tubulin concentration (uM)	Normalized rate of nucleation
1.68	0.1017
2.45	0.172
3.5	1
5.25	2.9171
7	3.9422
Data set 3
Tubulin concentration (uM)	Normalized rate of nucleation
2.45	0.8296
3.5	1
5.25	11.5778
7	30.9621
Data set 4
Tubulin concentration (uM)	Normalized rate of nucleation
3.5	1
7	3.3476
Data set 5
Tubulin concentration (uM)	Normalized rate of nucleation
3.5	1
7	10.5787

## Sheet: Figure 7F
gTuRC nucleation with putative activation factors
	Data-set 1							Data-set 2							Data-set 3								Data-set 1							Data-set 2						Data-set 3
Control: gTuRC, - Stathmin		Experiment: gTuRC, + Stathmin					Control: gTuRC, - Stathmin		Experiment: gTuRC, + Stathmin					Control: gTuRC, - Stathmin		Experiment: gTuRC, + Stathmin						Control: gTuRC, - MCAK		Experiment: gTuRC, + MCAK					Control: gTuRC, - MCAK		Experiment: gTuRC, + MCAK				Control: gTuRC, - MCAK		Experiment: gTuRC, + MCAK
Time (seconds)	Normalized nucleation activity	Time (seconds)	Normalized nucleation activity				Time (seconds)	Normalized nucleation activity	Time (seconds)	Normalized nucleation activity				Time (seconds)	Normalized nucleation activity	Time (seconds)	Normalized nucleation activity					Time (seconds)	Normalized nucleation activity	Time (seconds)	Normalized nucleation activity				Time (seconds)	Normalized nucleation activity	Time (seconds)	Normalized nucleation activity			Time (seconds)	Normalized nucleation activity	Time (seconds)	Normalized nucleation activity
0	0	0	0				0	0.010101	0	0				0	0	0	0					0	0.03125	0	0.03125				0	0	0	0			0	0.0212766	0	0
1	0	1	0				1	0.010101	1	0				1	0	1	0					1	0.03125	1	0.03125				1	0	1	0			1	0.0212766	1	0
2	0	2	0				2	0.010101	2	0				2	0	2	0					2	0.03125	2	0.03125				2	0	2	0			2	0.0212766	2	0
3	0	3	0				3	0.010101	3	0				3	0	3	0					3	0.03125	3	0.03125				3	0	3	0			3	0.0212766	3	0
4	0	4	0				4	0.0151515	4	0				4	0	4	0					4	0.03125	4	0.03125				4	0	4	0			4	0.0212766	4	0
5	0	5	0				5	0.0151515	5	0				5	0	5	0					5	0.03125	5	0.03125				5	0	5	0			5	0.0212766	5	0
6	0	6	0				6	0.0151515	6	0				6	0	6	0					6	0.03125	6	0.03125				6	0	6	0			6	0.0212766	6	0
7	0	7	0				7	0.0151515	7	0				7	0	7	0					7	0.03125	7	0.03125				7	0	7	0			7	0.0212766	7	0
8	0	8	0				8	0.0151515	8	0				8	0	8	0					8	0.03125	8	0.03125				8	0	8	0			8	0.0212766	8	0
9	0	9	0				9	0.0151515	9	0				9	0	9	0					9	0.03125	9	0.03125				9	0	9	0			9	0.0212766	9	0
10	0	10	0				10	0.0151515	10	0				10	0	10	0					10	0.03125	10	0.03125				10	0	10	0			10	0.0212766	10	0
11	0	11	0				11	0.0151515	11	0				11	0	11	0					11	0.03125	11	0.03125				11	0	11	0			11	0.0212766	11	0
12	0	12	0				12	0.020202	12	0				12	0	12	0					12	0.03125	12	0.03125				12	0	12	0			12	0.0212766	12	0
13	0	13	0				13	0.020202	13	0				13	0	13	0					13	0.03125	13	0.03125				13	0	13	0			13	0.0212766	13	0
14	0	14	0				14	0.020202	14	0				14	0	14	0					14	0.03125	14	0.03125				14	0	14	0			14	0.0212766	14	0
15	0	15	0				15	0.020202	15	0				15	0	15	0					15	0.03125	15	0.03125				15	0	15	0			15	0.0212766	15	0
16	0	16	0				16	0.0252525	16	0				16	0	16	0					16	0.03125	16	0.03125				16	0	16	0			16	0.0212766	16	0
17	0	17	0				17	0.0252525	17	0				17	0	17	0					17	0.03125	17	0.03125				17	0	17	0			17	0.0212766	17	0
18	0	18	0				18	0.0252525	18	0				18	0	18	0					18	0.03125	18	0.03125				18	0	18	0			18	0.0212766	18	0
19	0	19	0				19	0.0252525	19	0				19	0	19	0					19	0.03125	19	0.03125				19	0	19	0			19	0.0212766	19	0
20	0	20	0				20	0.0252525	20	0				20	0	20	0					20	0.03125	20	0.03125				20	0	20	0			20	0.0425532	20	0
21	0	21	0				21	0.0252525	21	0				21	0	21	0					21	0.03125	21	0.03125				21	0	21	0			21	0.0425532	21	0
22	0	22	0				22	0.0252525	22	0				22	0	22	0					22	0.03125	22	0.03125				22	0	22	0			22	0.0425532	22	0
23	0	23	0				23	0.030303	23	0				23	0	23	0					23	0.03125	23	0.03125				23	0	23	0			23	0.0425532	23	0
24	0	24	0				24	0.030303	24	0				24	0	24	0					24	0.03125	24	0.03125				24	0	24	0			24	0.0638298	24	0
25	0	25	0				25	0.030303	25	0				25	0	25	0					25	0.03125	25	0.03125				25	0	25	0			25	0.0638298	25	0
26	0	26	0				26	0.030303	26	0				26	0	26	0					26	0.03125	26	0.03125				26	0	26	0			26	0.0638298	26	0
27	0	27	0				27	0.030303	27	0				27	0	27	0					27	0.03125	27	0.03125				27	0	27	0			27	0.0638298	27	0
28	0	28	0				28	0.0353535	28	0				28	0	28	0					28	0.03125	28	0.03125				28	0	28	0			28	0.0638298	28	0
29	0	29	0				29	0.040404	29	0				29	0	29	0					29	0.03125	29	0.03125				29	0.0075188	29	0			29	0.0638298	29	0
30	0	30	0				30	0.040404	30	0				30	0.0117647	30	0					30	0.03125	30	0.03125				30	0.0075188	30	0			30	0.0851064	30	0
31	0	31	0				31	0.040404	31	0				31	0.0117647	31	0					31	0.03125	31	0.03125				31	0.0150376	31	0			31	0.0851064	31	0
32	0	32	0				32	0.0505051	32	0				32	0.0117647	32	0					32	0.03125	32	0.03125				32	0.0150376	32	0			32	0.0851064	32	0
33	0	33	0				33	0.0505051	33	0				33	0.0117647	33	0					33	0.03125	33	0.03125				33	0.0150376	33	0			33	0.0851064	33	0
34	0	34	0				34	0.0505051	34	0				34	0.0117647	34	0					34	0.03125	34	0.03125				34	0.0150376	34	0			34	0.0851064	34	0
35	0	35	0				35	0.0505051	35	0				35	0.0352941	35	0					35	0.03125	35	0.03125				35	0.0225564	35	0			35	0.0851064	35	0
36	0	36	0				36	0.0505051	36	0				36	0.0352941	36	0					36	0.03125	36	0.03125				36	0.0225564	36	0			36	0.106383	36	0
37	0	37	0				37	0.0505051	37	0				37	0.0352941	37	0					37	0.03125	37	0.03125				37	0.0300752	37	0			37	0.106383	37	0
38	0	38	0				38	0.0656566	38	0				38	0.0352941	38	0					38	0.03125	38	0.03125				38	0.0300752	38	0			38	0.106383	38	0
39	0	39	0				39	0.0656566	39	0				39	0.0352941	39	0					39	0.03125	39	0.03125				39	0.0451128	39	0			39	0.106383	39	0
40	0	40	0				40	0.0656566	40	0				40	0.0352941	40	0					40	0.03125	40	0.03125				40	0.0451128	40	0			40	0.12766	40	0
41	0	41	0				41	0.0707071	41	0				41	0.0352941	41	0					41	0.0625	41	0.03125				41	0.0526316	41	0			41	0.12766	41	0
42	0	42	0				42	0.0707071	42	0				42	0.0352941	42	0					42	0.0625	42	0.03125				42	0.0526316	42	0			42	0.148936	42	0
43	0	43	0				43	0.0858586	43	0				43	0.0470588	43	0					43	0.0625	43	0.03125				43	0.0526316	43	0			43	0.148936	43	0
44	0	44	0				44	0.0858586	44	0				44	0.0588235	44	0					44	0.0625	44	0.03125				44	0.0526316	44	0			44	0.148936	44	0
45	0	45	0				45	0.0858586	45	0				45	0.0705882	45	0					45	0.0625	45	0.03125				45	0.0526316	45	0			45	0.148936	45	0
46	0	46	0				46	0.0858586	46	0				46	0.0823529	46	0					46	0.0625	46	0.03125				46	0.0601504	46	0			46	0.148936	46	0
47	0	47	0				47	0.0858586	47	0				47	0.0823529	47	0					47	0.0625	47	0.03125				47	0.0601504	47	0			47	0.148936	47	0
48	0	48	0				48	0.0959596	48	0				48	0.0823529	48	0					48	0.0625	48	0.03125				48	0.0601504	48	0			48	0.148936	48	0
49	0	49	0				49	0.10101	49	0				49	0.0941176	49	0					49	0.0625	49	0.03125				49	0.0601504	49	0			49	0.148936	49	0
50	0.00970874	50	0				50	0.10101	50	0				50	0.0941176	50	0					50	0.0625	50	0.03125				50	0.0601504	50	0			50	0.148936	50	0
51	0.00970874	51	0				51	0.10101	51	0				51	0.0941176	51	0					51	0.09375	51	0.03125				51	0.075188	51	0			51	0.170213	51	0
52	0.00970874	52	0				52	0.10101	52	0				52	0.105882	52	0					52	0.09375	52	0.03125				52	0.0827068	52	0			52	0.170213	52	0
53	0.0194175	53	0				53	0.10101	53	0.00505051				53	0.105882	53	0					53	0.09375	53	0.03125				53	0.0827068	53	0			53	0.170213	53	0
54	0.0194175	54	0				54	0.106061	54	0.00505051				54	0.105882	54	0					54	0.125	54	0.03125				54	0.0902256	54	0			54	0.170213	54	0
55	0.0194175	55	0				55	0.111111	55	0.00505051				55	0.105882	55	0					55	0.125	55	0.03125				55	0.0902256	55	0			55	0.170213	55	0
56	0.0194175	56	0				56	0.111111	56	0.00505051				56	0.105882	56	0					56	0.125	56	0.03125				56	0.0977444	56	0			56	0.170213	56	0
57	0.0194175	57	0				57	0.116162	57	0.00505051				57	0.105882	57	0					57	0.125	57	0.03125				57	0.0977444	57	0			57	0.170213	57	0
58	0.038835	58	0				58	0.121212	58	0.00505051				58	0.105882	58	0					58	0.125	58	0.03125				58	0.0977444	58	0			58	0.170213	58	0
59	0.0485437	59	0				59	0.131313	59	0.00505051				59	0.117647	59	0					59	0.125	59	0.03125				59	0.112782	59	0			59	0.191489	59	0
60	0.0485437	60	0				60	0.141414	60	0.00505051				60	0.117647	60	0					60	0.1875	60	0.03125				60	0.120301	60	0			60	0.191489	60	0
61	0.0485437	61	0				61	0.151515	61	0.00505051				61	0.117647	61	0					61	0.1875	61	0.03125				61	0.12782	61	0			61	0.191489	61	0
62	0.0485437	62	0				62	0.161616	62	0.00505051				62	0.117647	62	0					62	0.1875	62	0.03125				62	0.12782	62	0			62	0.191489	62	0
63	0.0582524	63	0				63	0.171717	63	0.00505051				63	0.141176	63	0					63	0.1875	63	0.03125				63	0.135338	63	0			63	0.191489	63	0
64	0.0582524	64	0				64	0.176768	64	0.00505051				64	0.141176	64	0					64	0.1875	64	0.03125				64	0.135338	64	0			64	0.212766	64	0
65	0.0582524	65	0				65	0.186869	65	0.00505051				65	0.141176	65	0					65	0.1875	65	0.03125				65	0.135338	65	0			65	0.234043	65	0
66	0.0582524	66	0				66	0.186869	66	0.00505051				66	0.164706	66	0					66	0.1875	66	0.03125				66	0.142857	66	0			66	0.234043	66	0
67	0.0582524	67	0				67	0.19697	67	0.00505051				67	0.164706	67	0					67	0.1875	67	0.03125				67	0.142857	67	0			67	0.234043	67	0
68	0.0582524	68	0				68	0.19697	68	0.00505051				68	0.176471	68	0					68	0.1875	68	0.03125				68	0.142857	68	0			68	0.234043	68	0
69	0.0679612	69	0				69	0.20202	69	0.00505051				69	0.188235	69	0					69	0.21875	69	0.03125				69	0.142857	69	0			69	0.234043	69	0
70	0.0679612	70	0				70	0.207071	70	0.00505051				70	0.2	70	0					70	0.21875	70	0.03125				70	0.142857	70	0			70	0.234043	70	0
71	0.0679612	71	0				71	0.212121	71	0.00505051				71	0.2	71	0					71	0.21875	71	0.03125				71	0.142857	71	0			71	0.255319	71	0
72	0.0679612	72	0				72	0.212121	72	0.00505051				72	0.2	72	0					72	0.21875	72	0.03125				72	0.142857	72	0			72	0.255319	72	0
73	0.0776699	73	0				73	0.217172	73	0.00505051				73	0.2	73	0					73	0.21875	73	0.03125				73	0.150376	73	0			73	0.255319	73	0
74	0.0776699	74	0				74	0.217172	74	0.00505051				74	0.211765	74	0					74	0.21875	74	0.03125				74	0.150376	74	0			74	0.255319	74	0
75	0.106796	75	0.00970874				75	0.222222	75	0.00505051				75	0.211765	75	0					75	0.21875	75	0.03125				75	0.150376	75	0			75	0.276596	75	0
76	0.106796	76	0.00970874				76	0.227273	76	0.00505051				76	0.211765	76	0					76	0.21875	76	0.03125				76	0.150376	76	0			76	0.297872	76	0
77	0.106796	77	0.00970874				77	0.242424	77	0.00505051				77	0.211765	77	0					77	0.21875	77	0.03125				77	0.150376	77	0			77	0.297872	77	0
78	0.116505	78	0.00970874				78	0.252525	78	0.00505051				78	0.211765	78	0					78	0.21875	78	0.03125				78	0.157895	78	0			78	0.297872	78	0
79	0.116505	79	0.00970874				79	0.257576	79	0.00505051				79	0.211765	79	0					79	0.21875	79	0.03125				79	0.157895	79	0			79	0.319149	79	0
80	0.126214	80	0.00970874				80	0.262626	80	0.00505051				80	0.211765	80	0					80	0.21875	80	0.03125				80	0.165414	80	0			80	0.319149	80	0
81	0.126214	81	0.00970874				81	0.267677	81	0.00505051				81	0.223529	81	0					81	0.21875	81	0.03125				81	0.172932	81	0			81	0.319149	81	0
82	0.135922	82	0.00970874				82	0.282828	82	0.00505051				82	0.235294	82	0					82	0.21875	82	0.03125				82	0.180451	82	0			82	0.319149	82	0
83	0.15534	83	0.00970874				83	0.292929	83	0.00505051				83	0.235294	83	0					83	0.21875	83	0.03125				83	0.180451	83	0			83	0.319149	83	0
84	0.15534	84	0.00970874				84	0.30303	84	0.00505051				84	0.235294	84	0					84	0.21875	84	0.03125				84	0.180451	84	0			84	0.319149	84	0
85	0.165049	85	0.00970874				85	0.308081	85	0.00505051				85	0.235294	85	0					85	0.21875	85	0.03125				85	0.180451	85	0			85	0.319149	85	0
86	0.165049	86	0.00970874				86	0.313131	86	0.00505051				86	0.247059	86	0					86	0.21875	86	0.03125				86	0.195489	86	0			86	0.319149	86	0
87	0.174757	87	0.00970874				87	0.318182	87	0.00505051				87	0.247059	87	0					87	0.21875	87	0.03125				87	0.203008	87	0			87	0.319149	87	0
88	0.174757	88	0.00970874				88	0.318182	88	0.00505051				88	0.258824	88	0					88	0.21875	88	0.03125				88	0.210526	88	0			88	0.319149	88	0
89	0.174757	89	0.00970874				89	0.323232	89	0.00505051				89	0.258824	89	0					89	0.21875	89	0.03125				89	0.210526	89	0			89	0.319149	89	0
90	0.174757	90	0.00970874				90	0.328283	90	0.00505051				90	0.258824	90	0					90	0.21875	90	0.03125				90	0.225564	90	0			90	0.319149	90	0
91	0.184466	91	0.00970874				91	0.338384	91	0.00505051				91	0.282353	91	0					91	0.25	91	0.03125				91	0.225564	91	0			91	0.319149	91	0
92	0.184466	92	0.00970874				92	0.343434	92	0.00505051				92	0.282353	92	0					92	0.25	92	0.03125				92	0.225564	92	0			92	0.319149	92	0
93	0.184466	93	0.00970874				93	0.348485	93	0.00505051				93	0.282353	93	0					93	0.28125	93	0.03125				93	0.225564	93	0			93	0.319149	93	0
94	0.194175	94	0.00970874				94	0.353535	94	0.00505051				94	0.305882	94	0					94	0.28125	94	0.03125				94	0.225564	94	0			94	0.319149	94	0
95	0.213592	95	0.00970874				95	0.363636	95	0.00505051				95	0.317647	95	0					95	0.3125	95	0.03125				95	0.233083	95	0			95	0.319149	95	0
96	0.223301	96	0.00970874				96	0.363636	96	0.00505051				96	0.329412	96	0					96	0.34375	96	0.03125				96	0.24812	96	0			96	0.319149	96	0
97	0.223301	97	0.00970874				97	0.368687	97	0.00505051				97	0.329412	97	0					97	0.375	97	0.03125				97	0.255639	97	0			97	0.319149	97	0
98	0.223301	98	0.00970874				98	0.368687	98	0.00505051				98	0.329412	98	0					98	0.375	98	0.03125				98	0.278195	98	0			98	0.319149	98	0
99	0.223301	99	0.00970874				99	0.373737	99	0.00505051				99	0.329412	99	0					99	0.375	99	0.03125				99	0.278195	99	0			99	0.340426	99	0
100	0.242718	100	0.00970874				100	0.378788	100	0.00505051				100	0.329412	100	0					100	0.375	100	0.03125				100	0.293233	100	0			100	0.340426	100	0
101	0.252427	101	0.00970874				101	0.388889	101	0.00505051				101	0.352941	101	0					101	0.375	101	0.03125				101	0.300752	101	0			101	0.361702	101	0
102	0.262136	102	0.00970874				102	0.388889	102	0.00505051				102	0.352941	102	0					102	0.375	102	0.03125				102	0.323308	102	0			102	0.361702	102	0
103	0.281553	103	0.00970874				103	0.39899	103	0.00505051				103	0.352941	103	0					103	0.375	103	0.03125				103	0.323308	103	0			103	0.361702	103	0
104	0.281553	104	0.0194175				104	0.409091	104	0.00505051				104	0.364706	104	0					104	0.40625	104	0.03125				104	0.338346	104	0			104	0.404255	104	0
105	0.31068	105	0.0194175				105	0.424242	105	0.00505051				105	0.364706	105	0					105	0.4375	105	0.03125				105	0.345865	105	0			105	0.425532	105	0
106	0.31068	106	0.0194175				106	0.434343	106	0.00505051				106	0.388235	106	0					106	0.46875	106	0.03125				106	0.368421	106	0			106	0.468085	106	0
107	0.320388	107	0.0194175				107	0.434343	107	0.00505051				107	0.388235	107	0					107	0.46875	107	0.0625				107	0.368421	107	0			107	0.468085	107	0
108	0.320388	108	0.0194175				108	0.439394	108	0.00505051				108	0.4	108	0					108	0.5	108	0.0625				108	0.37594	108	0			108	0.468085	108	0
109	0.330097	109	0.0194175				109	0.449495	109	0.00505051				109	0.411765	109	0					109	0.5	109	0.0625				109	0.37594	109	0			109	0.468085	109	0
110	0.339806	110	0.0194175				110	0.464646	110	0.00505051				110	0.423529	110	0					110	0.5	110	0.0625				110	0.383459	110	0			110	0.489362	110	0
111	0.359223	111	0.0194175				111	0.464646	111	0.00505051				111	0.423529	111	0					111	0.5	111	0.0625				111	0.383459	111	0			111	0.510638	111	0
112	0.359223	112	0.0194175				112	0.479798	112	0.00505051				112	0.447059	112	0					112	0.53125	112	0.0625				112	0.383459	112	0			112	0.553191	112	0
113	0.368932	113	0.0194175				113	0.484848	113	0.00505051				113	0.447059	113	0					113	0.53125	113	0.0625				113	0.383459	113	0			113	0.553191	113	0
114	0.368932	114	0.0194175				114	0.489899	114	0.00505051				114	0.447059	114	0					114	0.53125	114	0.0625				114	0.398496	114	0			114	0.553191	114	0
115	0.368932	115	0.0194175				115	0.494949	115	0.00505051				115	0.447059	115	0					115	0.53125	115	0.0625				115	0.406015	115	0			115	0.553191	115	0
116	0.378641	116	0.0194175				116	0.5	116	0.00505051				116	0.447059	116	0					116	0.53125	116	0.0625				116	0.421053	116	0			116	0.574468	116	0
117	0.378641	117	0.0194175				117	0.510101	117	0.00505051				117	0.470588	117	0					117	0.53125	117	0.0625				117	0.421053	117	0			117	0.574468	117	0
118	0.417476	118	0.0194175				118	0.520202	118	0.00505051				118	0.470588	118	0					118	0.53125	118	0.0625				118	0.43609	118	0			118	0.574468	118	0
119	0.417476	119	0.0194175				119	0.520202	119	0.00505051				119	0.482353	119	0					119	0.53125	119	0.0625				119	0.43609	119	0			119	0.574468	119	0
120	0.427184	120	0.0194175				120	0.525253	120	0.00505051				120	0.505882	120	0					120	0.53125	120	0.0625				120	0.451128	120	0			120	0.595745	120	0
121	0.427184	121	0.0194175				121	0.525253	121	0.00505051				121	0.505882	121	0					121	0.53125	121	0.0625				121	0.451128	121	0			121	0.595745	121	0
122	0.427184	122	0.0194175				122	0.530303	122	0.00505051				122	0.505882	122	0					122	0.53125	122	0.0625				122	0.451128	122	0			122	0.617021	122	0
123	0.427184	123	0.0194175				123	0.535354	123	0.00505051				123	0.505882	123	0					123	0.53125	123	0.0625				123	0.451128	123	0			123	0.617021	123	0
124	0.436893	124	0.0194175				124	0.550505	124	0.00505051				124	0.505882	124	0					124	0.53125	124	0.0625				124	0.473684	124	0			124	0.617021	124	0
125	0.436893	125	0.0194175				125	0.555556	125	0.00505051				125	0.505882	125	0					125	0.53125	125	0.0625				125	0.473684	125	0			125	0.617021	125	0
126	0.436893	126	0.0194175				126	0.565657	126	0.00505051				126	0.517647	126	0					126	0.53125	126	0.0625				126	0.473684	126	0			126	0.617021	126	0
127	0.436893	127	0.0194175				127	0.570707	127	0.00505051				127	0.517647	127	0					127	0.5625	127	0.0625				127	0.473684	127	0			127	0.617021	127	0
128	0.456311	128	0.0194175				128	0.580808	128	0.00505051				128	0.517647	128	0					128	0.5625	128	0.0625				128	0.481203	128	0			128	0.638298	128	0
129	0.456311	129	0.0194175				129	0.585859	129	0.00505051				129	0.517647	129	0					129	0.5625	129	0.0625				129	0.481203	129	0			129	0.638298	129	0
130	0.466019	130	0.0194175				130	0.606061	130	0.00505051				130	0.517647	130	0					130	0.59375	130	0.0625				130	0.488722	130	0			130	0.638298	130	0
131	0.475728	131	0.0194175				131	0.616162	131	0.00505051				131	0.517647	131	0					131	0.59375	131	0.0625				131	0.488722	131	0			131	0.659574	131	0
132	0.485437	132	0.0291262				132	0.621212	132	0.00505051				132	0.541176	132	0					132	0.59375	132	0.0625				132	0.488722	132	0			132	0.659574	132	0
133	0.485437	133	0.0291262				133	0.621212	133	0.00505051				133	0.541176	133	0					133	0.59375	133	0.0625				133	0.488722	133	0			133	0.659574	133	0
134	0.495146	134	0.0291262				134	0.636364	134	0.00505051				134	0.552941	134	0					134	0.59375	134	0.0625				134	0.488722	134	0			134	0.680851	134	0
135	0.495146	135	0.0291262				135	0.646465	135	0.00505051				135	0.552941	135	0					135	0.625	135	0.0625				135	0.496241	135	0			135	0.723404	135	0
136	0.504854	136	0.0291262				136	0.666667	136	0.00505051				136	0.564706	136	0					136	0.625	136	0.0625				136	0.511278	136	0			136	0.723404	136	0
137	0.504854	137	0.0291262				137	0.676768	137	0.00505051				137	0.564706	137	0					137	0.625	137	0.0625				137	0.511278	137	0			137	0.723404	137	0
138	0.514563	138	0.0291262				138	0.676768	138	0.00505051				138	0.576471	138	0					138	0.625	138	0.0625				138	0.518797	138	0			138	0.744681	138	0
139	0.514563	139	0.0291262				139	0.681818	139	0.00505051				139	0.576471	139	0					139	0.625	139	0.0625				139	0.518797	139	0			139	0.744681	139	0
140	0.514563	140	0.0291262				140	0.70202	140	0.00505051				140	0.588235	140	0					140	0.625	140	0.0625				140	0.533835	140	0			140	0.744681	140	0
141	0.514563	141	0.0291262				141	0.70202	141	0.00505051				141	0.588235	141	0					141	0.625	141	0.0625				141	0.533835	141	0			141	0.744681	141	0
142	0.563107	142	0.0291262				142	0.712121	142	0.00505051				142	0.611765	142	0					142	0.65625	142	0.0625				142	0.541353	142	0			142	0.744681	142	0
143	0.563107	143	0.0291262				143	0.712121	143	0.00505051				143	0.611765	143	0					143	0.65625	143	0.0625				143	0.541353	143	0			143	0.744681	143	0
144	0.563107	144	0.0291262				144	0.727273	144	0.00505051				144	0.623529	144	0					144	0.65625	144	0.0625				144	0.571429	144	0			144	0.765957	144	0
145	0.563107	145	0.0291262				145	0.727273	145	0.00505051				145	0.623529	145	0					145	0.65625	145	0.0625				145	0.578947	145	0			145	0.765957	145	0
146	0.572816	146	0.0291262				146	0.732323	146	0.00505051				146	0.635294	146	0					146	0.65625	146	0.0625				146	0.593985	146	0			146	0.787234	146	0
147	0.572816	147	0.0291262				147	0.732323	147	0.00505051				147	0.647059	147	0					147	0.65625	147	0.0625				147	0.593985	147	0			147	0.787234	147	0
148	0.572816	148	0.0291262				148	0.742424	148	0.00505051				148	0.670588	148	0					148	0.6875	148	0.0625				148	0.609023	148	0			148	0.808511	148	0
149	0.572816	149	0.0291262				149	0.742424	149	0.00505051				149	0.670588	149	0					149	0.6875	149	0.0625				149	0.609023	149	0			149	0.808511	149	0
150	0.582524	150	0.0291262				150	0.747475	150	0.00505051				150	0.670588	150	0					150	0.71875	150	0.0625				150	0.616541	150	0			150	0.808511	150	0
151	0.592233	151	0.0291262				151	0.747475	151	0.00505051				151	0.670588	151	0					151	0.71875	151	0.0625				151	0.616541	151	0			151	0.808511	151	0
152	0.61165	152	0.0291262				152	0.762626	152	0.00505051				152	0.682353	152	0					152	0.71875	152	0.0625				152	0.631579	152	0			152	0.808511	152	0.0212766
153	0.61165	153	0.0291262				153	0.762626	153	0.00505051				153	0.682353	153	0					153	0.71875	153	0.0625				153	0.631579	153	0			153	0.808511	153	0.0212766
154	0.61165	154	0.0291262				154	0.767677	154	0.00505051				154	0.682353	154	0					154	0.71875	154	0.0625				154	0.646617	154	0			154	0.808511	154	0.0212766
155	0.61165	155	0.0291262				155	0.772727	155	0.00505051				155	0.682353	155	0					155	0.71875	155	0.0625				155	0.646617	155	0			155	0.808511	155	0.0212766
156	0.631068	156	0.0291262				156	0.777778	156	0.00505051				156	0.682353	156	0					156	0.71875	156	0.0625				156	0.669173	156	0			156	0.808511	156	0.0212766
157	0.631068	157	0.0291262				157	0.777778	157	0.00505051				157	0.694118	157	0					157	0.71875	157	0.0625				157	0.669173	157	0			157	0.808511	157	0.0212766
158	0.640777	158	0.0291262				158	0.80303	158	0.00505051				158	0.717647	158	0					158	0.71875	158	0.0625				158	0.684211	158	0			158	0.808511	158	0.0212766
159	0.640777	159	0.0291262				159	0.80303	159	0.00505051				159	0.729412	159	0					159	0.75	159	0.0625				159	0.684211	159	0			159	0.808511	159	0.0212766
160	0.669903	160	0.0291262				160	0.818182	160	0.00505051				160	0.729412	160	0					160	0.75	160	0.0625				160	0.691729	160	0			160	0.808511	160	0.0212766
161	0.68932	161	0.0291262				161	0.818182	161	0.00505051				161	0.741176	161	0					161	0.75	161	0.0625				161	0.691729	161	0			161	0.808511	161	0.0212766
162	0.68932	162	0.0291262				162	0.818182	162	0.00505051				162	0.741176	162	0					162	0.75	162	0.0625				162	0.714286	162	0			162	0.808511	162	0.0212766
163	0.68932	163	0.0291262				163	0.833333	163	0.00505051				163	0.741176	163	0					163	0.75	163	0.0625				163	0.714286	163	0			163	0.808511	163	0.0212766
164	0.68932	164	0.0291262				164	0.838384	164	0.00505051				164	0.741176	164	0					164	0.75	164	0.0625				164	0.736842	164	0			164	0.808511	164	0.0212766
165	0.68932	165	0.0291262				165	0.838384	165	0.00505051				165	0.741176	165	0					165	0.75	165	0.0625				165	0.736842	165	0.0075188			165	0.808511	165	0.0212766
166	0.699029	166	0.0291262				166	0.858586	166	0.00505051				166	0.752941	166	0					166	0.75	166	0.0625				166	0.736842	166	0.0075188			166	0.851064	166	0.0212766
167	0.699029	167	0.0291262				167	0.858586	167	0.00505051				167	0.752941	167	0					167	0.75	167	0.0625				167	0.736842	167	0.0075188			167	0.851064	167	0.0212766
168	0.728155	168	0.0291262				168	0.868687	168	0.00505051				168	0.776471	168	0					168	0.75	168	0.0625				168	0.744361	168	0.0075188			168	0.851064	168	0.0212766
169	0.728155	169	0.0291262				169	0.868687	169	0.00505051				169	0.788235	169	0					169	0.75	169	0.0625				169	0.759398	169	0.0075188			169	0.851064	169	0.0212766
170	0.747573	170	0.0291262				170	0.873737	170	0.00505051				170	0.8	170	0					170	0.78125	170	0.0625				170	0.766917	170	0.0075188			170	0.851064	170	0.0212766
171	0.757282	171	0.0291262				171	0.873737	171	0.00505051				171	0.811765	171	0					171	0.78125	171	0.0625				171	0.766917	171	0.0075188			171	0.851064	171	0.0212766
172	0.776699	172	0.0291262				172	0.883838	172	0.00505051				172	0.823529	172	0					172	0.8125	172	0.0625				172	0.781955	172	0.0150376			172	0.851064	172	0.0425532
173	0.776699	173	0.0291262				173	0.883838	173	0.00505051				173	0.823529	173	0					173	0.8125	173	0.0625				173	0.781955	173	0.0150376			173	0.851064	173	0.0425532
174	0.776699	174	0.0291262				174	0.893939	174	0.00505051				174	0.835294	174	0					174	0.8125	174	0.0625				174	0.796992	174	0.0150376			174	0.87234	174	0.0425532
175	0.776699	175	0.0291262				175	0.893939	175	0.00505051				175	0.835294	175	0					175	0.8125	175	0.0625				175	0.804511	175	0.0150376			175	0.87234	175	0.0425532
176	0.796117	176	0.0291262				176	0.909091	176	0.00505051				176	0.835294	176	0					176	0.8125	176	0.0625				176	0.81203	176	0.0225564			176	0.914894	176	0.0425532
177	0.805825	177	0.0291262				177	0.909091	177	0.00505051				177	0.847059	177	0					177	0.8125	177	0.0625				177	0.81203	177	0.0225564			177	0.914894	177	0.0425532
178	0.834951	178	0.0291262				178	0.909091	178	0.00505051				178	0.870588	178	0					178	0.8125	178	0.0625				178	0.827068	178	0.0225564			178	0.914894	178	0.0425532
179	0.84466	179	0.0291262				179	0.914141	179	0.00505051				179	0.870588	179	0					179	0.8125	179	0.0625				179	0.827068	179	0.0225564			179	0.914894	179	0.0425532
180	0.873786	180	0.0291262				180	0.929293	180	0.00505051				180	0.894118	180	0					180	0.8125	180	0.0625				180	0.842105	180	0.0225564			180	0.93617	180	0.0425532
181	0.873786	181	0.0291262				181	0.929293	181	0.00505051				181	0.894118	181	0					181	0.8125	181	0.0625				181	0.842105	181	0.0225564			181	0.93617	181	0.0425532
182	0.883495	182	0.0291262				182	0.929293	182	0.00505051				182	0.894118	182	0					182	0.8125	182	0.0625				182	0.842105	182	0.0225564			182	0.957447	182	0.0425532
183	0.883495	183	0.0291262				183	0.929293	183	0.00505051				183	0.894118	183	0					183	0.8125	183	0.0625				183	0.842105	183	0.0225564			183	0.957447	183	0.0425532
184	0.893204	184	0.0291262				184	0.939394	184	0.00505051				184	0.894118	184	0					184	0.8125	184	0.0625				184	0.87218	184	0.0225564			184	1	184	0.0425532
185	0.902913	185	0.0291262				185	0.939394	185	0.00505051				185	0.894118	185	0					185	0.8125	185	0.0625				185	0.87218	185	0.0225564			185	1	185	0.0425532
186	0.92233	186	0.0291262				186	0.949495	186	0.00505051				186	0.905882	186	0					186	0.8125	186	0.0625				186	0.887218	186	0.0225564			186	1	186	0.0425532
187	0.92233	187	0.0291262				187	0.954545	187	0.00505051				187	0.905882	187	0					187	0.875	187	0.0625				187	0.887218	187	0.0225564			187	1	187	0.0425532
188	0.92233	188	0.0291262				188	0.959596	188	0.00505051				188	0.917647	188	0					188	0.90625	188	0.0625				188	0.902256	188	0.0225564			188	1	188	0.0425532
189	0.92233	189	0.0291262				189	0.959596	189	0.00505051				189	0.917647	189	0					189	0.9375	189	0.0625				189	0.902256	189	0.0225564			189	1	189	0.0425532
190	0.92233	190	0.0291262				190	0.969697	190	0.00505051				190	0.929412	190	0					190	0.9375	190	0.0625				190	0.924812	190	0.0225564			190	1	190	0.0425532
191	0.932039	191	0.0291262				191	0.969697	191	0.00505051				191	0.929412	191	0					191	0.9375	191	0.0625				191	0.924812	191	0.0225564			191	1	191	0.0425532
192	0.941748	192	0.0291262				192	0.974747	192	0.00505051				192	0.929412	192	0					192	0.9375	192	0.0625				192	0.947368	192	0.0225564			192	1	192	0.0425532
193	0.951456	193	0.0291262				193	0.979798	193	0.00505051				193	0.929412	193	0					193	0.9375	193	0.0625				193	0.954887	193	0.0225564			193	1	193	0.0425532
194	0.970874	194	0.0291262				194	0.979798	194	0.00505051				194	0.952941	194	0					194	0.96875	194	0.0625				194	0.969925	194	0.0225564			194	1	194	0.0425532
195	0.970874	195	0.0291262				195	0.979798	195	0.00505051				195	0.952941	195	0					195	0.96875	195	0.0625				195	0.969925	195	0.0225564			195	1	195	0.0425532
196	0.980583	196	0.0291262				196	0.984848	196	0.00505051				196	0.964706	196	0					196	0.96875	196	0.0625				196	0.984962	196	0.0225564			196	1	196	0.0425532
197	0.980583	197	0.0291262				197	0.989899	197	0.00505051				197	0.976471	197	0					197	0.96875	197	0.0625				197	0.984962	197	0.0225564			197	1	197	0.0425532
198	0.980583	198	0.0291262				198	0.994949	198	0.00505051				198	0.988235	198	0					198	1	198	0.0625				198	1	198	0.0225564			198	1	198	0.0425532
199	0.980583	199	0.0291262				199	0.994949	199	0.00505051				199	0.988235	199	0					199	1	199	0.0625				199	1	199	0.0225564			199	1	199	0.0425532
200	1	200	0.0291262				200	1	200	0.00505051				200	1	200	0					200	1	200	0.0625				200	1	200	0.0225564			200	1	200	0.0425532
201	1	201	0.0291262				201	1	201	0.00505051				201	1	201	0					201	1	201	0.0625				201	1	201	0.0225564			201	1	201	0.0425532
202	1.00971	202	0.0291262				202	1.00505	202	0.00505051				202	1.01176	202	0.0117647					202	1	202	0.0625				202	1.00752	202	0.0225564			202	1	202	0.0425532
203	1.00971	203	0.0291262				203	1.00505	203	0.00505051				203	1.01176	203	0.0117647					203	1	203	0.0625				203	1.00752	203	0.0225564			203	1	203	0.0425532
204	1.00971	204	0.0291262				204	1.0101	204	0.00505051				204	1.01176	204	0.0117647					204	1	204	0.0625				204	1.03008	204	0.0225564			204	1.04255	204	0.0425532
205	1.00971	205	0.0291262				205	1.0101	205	0.00505051				205	1.01176	205	0.0117647					205	1	205	0.0625				205	1.03759	205	0.0225564			205	1.04255	205	0.0425532
206	1.01942	206	0.0291262				206	1.01515	206	0.00505051				206	1.01176	206	0.0117647					206	1	206	0.0625				206	1.05263	206	0.0225564			206	1.06383	206	0.0425532
207	1.01942	207	0.0291262				207	1.01515	207	0.00505051				207	1.01176	207	0.0117647					207	1	207	0.0625				207	1.05263	207	0.0225564			207	1.06383	207	0.0425532
208	1.02913	208	0.0291262				208	1.0202	208	0.00505051				208	1.02353	208	0.0117647					208	1	208	0.0625				208	1.05263	208	0.0225564			208	1.06383	208	0.0425532
209	1.02913	209	0.0291262				209	1.0202	209	0.00505051				209	1.02353	209	0.0117647					209	1	209	0.0625				209	1.05263	209	0.0225564			209	1.06383	209	0.0425532
210	1.03883	210	0.0291262				210	1.0404	210	0.00505051				210	1.02353	210	0.0117647					210	1	210	0.0625				210	1.07519	210	0.0225564			210	1.08511	210	0.0425532
211	1.03883	211	0.0291262				211	1.0404	211	0.00505051				211	1.02353	211	0.0117647					211	1	211	0.0625				211	1.07519	211	0.0225564			211	1.08511	211	0.0425532
212	1.04854	212	0.0291262				212	1.05051	212	0.00505051				212	1.03529	212	0.0117647					212	1	212	0.0625				212	1.09774	212	0.0225564			212	1.10638	212	0.0425532
213	1.04854	213	0.0291262				213	1.05051	213	0.00505051				213	1.04706	213	0.0117647					213	1	213	0.0625				213	1.10526	213	0.0225564			213	1.10638	213	0.0425532
214	1.04854	214	0.0291262				214	1.06566	214	0.00505051				214	1.04706	214	0.0117647					214	1	214	0.0625				214	1.10526	214	0.0225564			214	1.10638	214	0.0425532
215	1.04854	215	0.0291262				215	1.06566	215	0.00505051				215	1.04706	215	0.0117647					215	1	215	0.0625				215	1.10526	215	0.0225564			215	1.10638	215	0.0425532
216	1.05825	216	0.0291262				216	1.07576	216	0.00505051				216	1.05882	216	0.0117647					216	1	216	0.0625				216	1.12782	216	0.0225564			216	1.12766	216	0.0425532
217	1.05825	217	0.0291262				217	1.07576	217	0.00505051				217	1.05882	217	0.0117647					217	1	217	0.0625				217	1.12782	217	0.0225564			217	1.12766	217	0.0425532
218	1.05825	218	0.0291262				218	1.08586	218	0.00505051				218	1.07059	218	0.0117647					218	1	218	0.0625				218	1.13534	218	0.0225564			218	1.14894	218	0.0425532
219	1.05825	219	0.0291262				219	1.08586	219	0.00505051				219	1.07059	219	0.0117647					219	1	219	0.0625				219	1.13534	219	0.0225564			219	1.14894	219	0.0425532
220	1.06796	220	0.0291262				220	1.09596	220	0.00505051				220	1.08235	220	0.0117647					220	1.03125	220	0.0625				220	1.13534	220	0.0225564			220	1.17021	220	0.0425532
221	1.06796	221	0.0291262				221	1.09596	221	0.00505051				221	1.08235	221	0.0117647					221	1.0625	221	0.0625				221	1.13534	221	0.0225564			221	1.17021	221	0.0425532
222	1.06796	222	0.0291262				222	1.10101	222	0.00505051				222	1.08235	222	0.0117647					222	1.0625	222	0.0625				222	1.15789	222	0.0225564			222	1.21277	222	0.0425532
223	1.06796	223	0.0291262				223	1.10606	223	0.00505051				223	1.08235	223	0.0117647					223	1.0625	223	0.0625				223	1.16541	223	0.0225564			223	1.21277	223	0.0425532
224	1.07767	224	0.0291262				224	1.10606	224	0.00505051				224	1.10588	224	0.0117647					224	1.0625	224	0.0625				224	1.16541	224	0.0225564			224	1.21277	224	0.0425532
225	1.07767	225	0.0291262				225	1.10606	225	0.00505051				225	1.11765	225	0.0117647					225	1.0625	225	0.0625				225	1.16541	225	0.0225564			225	1.21277	225	0.0425532
226	1.07767	226	0.0291262				226	1.11616	226	0.00505051				226	1.14118	226	0.0117647					226	1.0625	226	0.0625				226	1.19549	226	0.0300752			226	1.21277	226	0.0425532
227	1.07767	227	0.0291262				227	1.11616	227	0.00505051				227	1.15294	227	0.0117647					227	1.0625	227	0.0625				227	1.19549	227	0.0300752			227	1.21277	227	0.0425532
228	1.08738	228	0.0291262				228	1.11616	228	0.00505051				228	1.15294	228	0.0117647					228	1.0625	228	0.0625				228	1.19549	228	0.0300752			228	1.23404	228	0.0425532
229	1.08738	229	0.0291262				229	1.11616	229	0.00505051				229	1.15294	229	0.0117647					229	1.0625	229	0.0625				229	1.19549	229	0.0300752			229	1.23404	229	0.0425532
230	1.08738	230	0.0291262				230	1.12121	230	0.00505051				230	1.16471	230	0.0117647					230	1.0625	230	0.0625				230	1.20301	230	0.0300752			230	1.23404	230	0.0425532
231	1.08738	231	0.0291262				231	1.12626	231	0.00505051				231	1.16471	231	0.0117647					231	1.0625	231	0.0625				231	1.20301	231	0.0300752			231	1.23404	231	0.0425532
232	1.09709	232	0.0291262				232	1.12626	232	0.00505051				232	1.16471	232	0.0117647					232	1.0625	232	0.0625				232	1.21053	232	0.0300752			232	1.25532	232	0.0425532
233	1.1068	233	0.0291262				233	1.12626	233	0.00505051				233	1.16471	233	0.0117647					233	1.09375	233	0.0625				233	1.21053	233	0.0300752			233	1.25532	233	0.0425532
234	1.1165	234	0.0291262				234	1.13131	234	0.00505051				234	1.17647	234	0.0117647					234	1.09375	234	0.0625				234	1.23308	234	0.0300752			234	1.2766	234	0.0425532
235	1.1165	235	0.0291262				235	1.14141	235	0.00505051				235	1.17647	235	0.0117647					235	1.09375	235	0.0625				235	1.2406	235	0.0300752			235	1.2766	235	0.0425532
236	1.1165	236	0.0291262				236	1.16162	236	0.00505051				236	1.18824	236	0.0117647					236	1.09375	236	0.0625				236	1.2406	236	0.0300752			236	1.2766	236	0.0425532
237	1.1165	237	0.0291262				237	1.16162	237	0.00505051				237	1.18824	237	0.0117647					237	1.09375	237	0.0625				237	1.2406	237	0.0300752			237	1.2766	237	0.0425532
238	1.12621	238	0.0291262				238	1.17172	238	0.00505051				238	1.18824	238	0.0117647					238	1.09375	238	0.0625				238	1.24812	238	0.037594			238	1.2766	238	0.0425532
239	1.13592	239	0.0291262				239	1.17172	239	0.00505051				239	1.18824	239	0.0117647					239	1.09375	239	0.0625				239	1.24812	239	0.037594			239	1.2766	239	0.0425532
240	1.14563	240	0.0291262				240	1.19192	240	0.00505051				240	1.18824	240	0.0117647					240	1.09375	240	0.0625				240	1.25564	240	0.037594			240	1.34043	240	0.0638298
241	1.14563	241	0.0291262				241	1.19697	241	0.00505051				241	1.18824	241	0.0117647					241	1.09375	241	0.0625				241	1.25564	241	0.0451128			241	1.34043	241	0.0638298
242	1.15534	242	0.0291262				242	1.21212	242	0.00505051				242	1.18824	242	0.0117647					242	1.09375	242	0.0625				242	1.25564	242	0.0451128			242	1.34043	242	0.0638298
243	1.15534	243	0.0291262				243	1.21212	243	0.00505051				243	1.18824	243	0.0117647					243	1.09375	243	0.0625				243	1.25564	243	0.0451128			243	1.34043	243	0.0638298
244	1.17476	244	0.0291262				244	1.21717	244	0.00505051				244	1.2	244	0.0117647					244	1.09375	244	0.0625				244	1.26316	244	0.0451128			244	1.34043	244	0.0851064
245	1.17476	245	0.0291262				245	1.21717	245	0.00505051				245	1.21176	245	0.0117647					245	1.09375	245	0.0625				245	1.26316	245	0.0451128			245	1.34043	245	0.0851064
246	1.17476	246	0.0291262				246	1.23232	246	0.00505051				246	1.23529	246	0.0117647					246	1.09375	246	0.0625				246	1.27068	246	0.0451128			246	1.34043	246	0.0851064
247	1.17476	247	0.0291262				247	1.23232	247	0.00505051				247	1.23529	247	0.0117647					247	1.09375	247	0.0625				247	1.27068	247	0.0451128			247	1.34043	247	0.0851064
248	1.18447	248	0.0291262				248	1.23737	248	0.00505051				248	1.23529	248	0.0117647					248	1.09375	248	0.0625				248	1.27068	248	0.0451128			248	1.40426	248	0.0851064
249	1.19417	249	0.0291262				249	1.23737	249	0.00505051				249	1.23529	249	0.0117647					249	1.09375	249	0.0625				249	1.27068	249	0.0451128			249	1.40426	249	0.0851064
250	1.2233	250	0.0291262				250	1.23737	250	0.00505051				250	1.23529	250	0.0117647					250	1.09375	250	0.0625				250	1.27068	250	0.0451128			250	1.40426	250	0.0851064
251	1.2233	251	0.0291262				251	1.23737	251	0.00505051				251	1.23529	251	0.0117647					251	1.125	251	0.0625				251	1.27068	251	0.0451128			251	1.40426	251	0.0851064
252	1.23301	252	0.0291262				252	1.24242	252	0.00505051				252	1.24706	252	0.0117647					252	1.125	252	0.0625				252	1.2782	252	0.0451128			252	1.40426	252	0.0851064
253	1.24272	253	0.0291262				253	1.24242	253	0.00505051				253	1.24706	253	0.0117647					253	1.125	253	0.0625				253	1.2782	253	0.0451128			253	1.40426	253	0.0851064
254	1.24272	254	0.0291262				254	1.24747	254	0.00505051				254	1.25882	254	0.0117647					254	1.125	254	0.0625				254	1.29323	254	0.0451128			254	1.42553	254	0.0851064
255	1.24272	255	0.0291262				255	1.25253	255	0.00505051				255	1.25882	255	0.0117647					255	1.125	255	0.0625				255	1.29323	255	0.0451128			255	1.42553	255	0.0851064
256	1.24272	256	0.0291262				256	1.26263	256	0.00505051				256	1.25882	256	0.0117647					256	1.125	256	0.0625				256	1.30075	256	0.0451128			256	1.42553	256	0.0851064
257	1.25243	257	0.0291262				257	1.26263	257	0.00505051				257	1.25882	257	0.0117647					257	1.125	257	0.0625				257	1.30075	257	0.0451128			257	1.42553	257	0.0851064
258	1.29126	258	0.0291262				258	1.27273	258	0.00505051				258	1.27059	258	0.0117647					258	1.125	258	0.0625				258	1.30827	258	0.0451128			258	1.42553	258	0.0851064
259	1.29126	259	0.0291262				259	1.27778	259	0.00505051				259	1.27059	259	0.0117647					259	1.125	259	0.0625				259	1.30827	259	0.0451128			259	1.42553	259	0.0851064
260	1.30097	260	0.0291262				260	1.27778	260	0.00505051				260	1.29412	260	0.0117647					260	1.125	260	0.0625				260	1.32331	260	0.0451128			260	1.42553	260	0.0851064
261	1.30097	261	0.0291262				261	1.28788	261	0.00505051				261	1.29412	261	0.0117647					261	1.125	261	0.0625				261	1.32331	261	0.0451128			261	1.42553	261	0.0851064
262	1.31068	262	0.0291262				262	1.29798	262	0.00505051				262	1.30588	262	0.0117647					262	1.125	262	0.0625				262	1.32331	262	0.0451128			262	1.44681	262	0.0851064
263	1.31068	263	0.0291262				263	1.29798	263	0.00505051				263	1.30588	263	0.0117647					263	1.125	263	0.0625				263	1.32331	263	0.0451128			263	1.44681	263	0.0851064
264	1.32039	264	0.0291262				264	1.30303	264	0.00505051				264	1.30588	264	0.0117647					264	1.125	264	0.0625				264	1.32331	264	0.0451128			264	1.44681	264	0.0851064
265	1.32039	265	0.0291262				265	1.30808	265	0.00505051				265	1.30588	265	0.0117647					265	1.125	265	0.0625				265	1.33083	265	0.0451128			265	1.44681	265	0.0851064
266	1.33981	266	0.0291262				266	1.31313	266	0.00505051				266	1.30588	266	0.0117647					266	1.125	266	0.0625				266	1.33083	266	0.0451128			266	1.44681	266	0.0851064
267	1.33981	267	0.0291262				267	1.31818	267	0.00505051				267	1.30588	267	0.0117647					267	1.125	267	0.0625				267	1.33835	267	0.0451128			267	1.44681	267	0.0851064
268	1.35922	268	0.0291262				268	1.33333	268	0.00505051				268	1.31765	268	0.0117647					268	1.125	268	0.0625				268	1.33835	268	0.0451128			268	1.44681	268	0.0851064
269	1.35922	269	0.0291262				269	1.34343	269	0.00505051				269	1.31765	269	0.0117647					269	1.125	269	0.0625				269	1.33835	269	0.0451128			269	1.44681	269	0.0851064
270	1.37864	270	0.0291262				270	1.34343	270	0.00505051				270	1.35294	270	0.0117647					270	1.125	270	0.0625				270	1.33835	270	0.0451128			270	1.46809	270	0.0851064
271	1.37864	271	0.0291262				271	1.34343	271	0.00505051				271	1.35294	271	0.0117647					271	1.125	271	0.0625				271	1.33835	271	0.0451128			271	1.46809	271	0.0851064
272	1.37864	272	0.0291262				272	1.34848	272	0.00505051				272	1.35294	272	0.0117647					272	1.125	272	0.0625				272	1.3609	272	0.0451128			272	1.46809	272	0.0851064
273	1.37864	273	0.0291262				273	1.34848	273	0.00505051				273	1.35294	273	0.0117647					273	1.125	273	0.0625				273	1.3609	273	0.0451128			273	1.46809	273	0.0851064
274	1.38835	274	0.0291262				274	1.34848	274	0.00505051				274	1.35294	274	0.0117647					274	1.125	274	0.0625				274	1.39098	274	0.0451128			274	1.48936	274	0.0851064
275	1.38835	275	0.0291262				275	1.34848	275	0.00505051				275	1.35294	275	0.0117647					275	1.125	275	0.0625				275	1.39098	275	0.0451128			275	1.48936	275	0.0851064
276	1.40777	276	0.0291262				276	1.35859	276	0.00505051				276	1.35294	276	0.0117647					276	1.125	276	0.0625				276	1.40602	276	0.0451128			276	1.48936	276	0.106383
277	1.40777	277	0.0291262				277	1.35859	277	0.00505051				277	1.35294	277	0.0117647					277	1.125	277	0.0625				277	1.40602	277	0.0451128			277	1.48936	277	0.106383
278	1.41748	278	0.0291262				278	1.35859	278	0.00505051				278	1.35294	278	0.0117647					278	1.125	278	0.0625				278	1.40602	278	0.0451128			278	1.48936	278	0.12766
279	1.41748	279	0.0291262				279	1.35859	279	0.00505051				279	1.35294	279	0.0117647					279	1.125	279	0.0625				279	1.40602	279	0.0451128			279	1.48936	279	0.12766
280	1.42718	280	0.0291262				280	1.35859	280	0.00505051				280	1.35294	280	0.0117647					280	1.125	280	0.0625				280	1.42105	280	0.0451128			280	1.48936	280	0.12766
281	1.42718	281	0.0291262				281	1.35859	281	0.00505051				281	1.35294	281	0.0117647					281	1.125	281	0.0625				281	1.42857	281	0.0451128			281	1.48936	281	0.12766
282	1.4466	282	0.0291262				282	1.36364	282	0.00505051				282	1.35294	282	0.0117647					282	1.125	282	0.0625						282	0.0451128			282	1.48936	282	0.12766
283	1.4466	283	0.0291262				283	1.36869	283	0.00505051				283	1.35294	283	0.0117647					283	1.125	283	0.0625						283	0.0451128			283	1.48936	283	0.12766
284	1.4466	284	0.0291262				284	1.37374	284	0.00505051				284	1.37647	284	0.0117647					284	1.125	284	0.0625						284	0.0451128			284	1.48936	284	0.12766
285	1.4466	285	0.0291262				285	1.37374	285	0.00505051				285	1.37647	285	0.0117647					285	1.125	285	0.0625						285	0.0451128			285	1.48936	285	0.12766
286	1.45631	286	0.0291262				286	1.38889	286	0.00505051				286	1.37647	286	0.0117647					286	1.125	286	0.0625						286	0.0451128			286	1.48936	286	0.12766
287	1.45631	287	0.0291262				287	1.38889	287	0.00505051				287	1.37647	287	0.0117647					287	1.125	287	0.0625						287	0.0451128			287	1.48936	287	0.12766
288	1.45631	288	0.0291262				288	1.39394	288	0.00505051				288	1.37647	288	0.0117647					288	1.15625	288	0.0625						288	0.0451128			288	1.48936	288	0.12766
289	1.45631	289	0.0291262				289	1.39394	289	0.00505051				289	1.37647	289	0.0117647					289	1.15625	289	0.0625						289	0.0451128			289	1.48936	289	0.12766
290	1.45631	290	0.0291262				290	1.39899	290	0.00505051				290	1.37647	290	0.0117647					290	1.15625	290	0.0625						290	0.0451128			290	1.51064	290	0.12766
291	1.45631	291	0.0291262				291	1.40404	291	0.00505051				291	1.37647	291	0.0117647					291	1.15625	291	0.0625						291	0.0451128			291	1.51064	291	0.12766
292	1.45631	292	0.0291262				292	1.41414	292	0.00505051				292	1.37647	292	0.0117647					292	1.15625	292	0.0625						292	0.0451128			292	1.51064	292	0.12766
293	1.45631	293	0.0291262				293	1.41414	293	0.00505051				293	1.37647	293	0.0117647					293	1.15625	293	0.0625						293	0.0451128			293	1.51064	293	0.12766
294	1.46602	294	0.0291262				294	1.42424	294	0.00505051				294	1.37647	294	0.0117647					294	1.15625	294	0.0625						294	0.0451128			294	1.53191	294	0.12766
295	1.46602	295	0.0291262				295	1.42424	295	0.00505051				295	1.37647	295	0.0117647					295	1.15625	295	0.0625						295	0.0451128			295	1.53191	295	0.12766
296	1.46602	296	0.0291262				296	1.42424	296	0.00505051				296	1.37647	296	0.0117647					296	1.15625	296	0.0625						296	0.0451128			296	1.55319	296	0.12766
297	1.46602	297	0.0291262				297	1.42929	297	0.00505051				297	1.37647	297	0.0117647					297	1.15625	297	0.0625						297	0.0451128			297	1.55319	297	0.12766
298	1.47573	298	0.0291262				298	1.43939	298	0.00505051				298	1.37647	298	0.0117647					298	1.15625	298	0.0625						298	0.0451128			298	1.57447	298	0.12766
299	1.47573	299	0.0291262				299	1.43939	299	0.00505051				299	1.37647	299	0.0117647					299	1.15625	299	0.0625						299	0.0451128			299	1.57447	299	0.12766

## Sheet: Fig 7-Supp 1B
XMAP215 added to gTuRC at low tubulin concentrations
				Data set 1															Data set 2
	3.5uM tubulin					7uM tubulin									3.5uM tubulin					7uM tubulin
gTuRC only		gTuRC + XMAP215			gTuRC only		XMAP215 only		gTuRC + XMAP215					gTuRC only		gTuRC + XMAP215			gTuRC only		gTuRC + XMAP215
Time (seconds)	Probability of nucleation	Time (seconds)	Probability of nucleation		Time (seconds)	Probability of nucleation	Time (seconds)	Probability of nucleation	Time (seconds)	Probability of nucleation				Time (seconds)	Probability of nucleation	Time (seconds)	Probability of nucleation		Time (seconds)	Probability of nucleation	Time (seconds)	Probability of nucleation
0	0	0	0		0	0	0	0	0	0				0	0	0	0		0	0	0	1
1	0	1	0		1	0	1	0	1	0				1	0	1	0		1	0	1	1
2	0	2	0		2	0	2	0	2	0				2	0	2	0		2	0	2	1
3	0	3	0		3	0	3	0	3	0				3	0	3	0		3	0	3	1
4	0	4	0		4	0	4	0	4	0				4	0	4	0		4	0	4	1
5	0	5	0		5	0	5	0	5	0				5	0	5	0		5	0	5	1
6	0	6	0		6	0	6	0	6	0				6	0	6	0		6	1	6	1
7	0	7	0		7	0	7	0	7	0				7	0	7	0		7	1	7	1
8	0	8	0		8	0	8	0	8	0				8	0	8	0		8	1	8	1
9	0	9	0		9	0	9	0	9	0				9	0	9	0		9	1	9	1
10	0	10	0		10	0	10	0	10	0				10	0	10	0		10	1	10	1
11	0	11	0		11	0	11	0	11	0				11	0	11	0		11	1	11	1
12	0	12	0		12	0	12	0	12	0				12	0	12	0		12	1	12	1
13	0	13	0		13	0	13	0	13	0				13	0	13	0		13	1	13	1
14	0	14	1		14	0	14	0	14	0				14	0	14	0		14	1	14	1
15	0	15	1		15	0	15	0	15	0				15	0	15	0		15	1	15	1
16	0	16	1		16	0	16	0	16	0				16	0	16	0		16	1	16	1
17	0	17	1		17	0	17	0	17	0				17	0	17	0		17	1	17	1
18	0	18	1		18	0	18	0	18	0				18	0	18	0		18	1	18	1
19	0	19	1		19	0	19	0	19	0				19	0	19	0		19	1	19	1
20	0	20	1		20	0	20	0	20	0				20	0	20	0		20	1	20	3
21	0	21	1		21	0	21	0	21	0				21	0	21	0		21	1	21	3
22	0	22	1		22	1	22	0	22	0				22	0	22	0		22	1	22	3
23	0	23	2		23	1	23	0	23	1				23	0	23	0		23	1	23	5
24	0	24	2		24	1	24	0	24	1				24	0	24	0		24	1	24	5
25	0	25	2		25	1	25	0	25	1				25	0	25	0		25	1	25	5
26	0	26	2		26	1	26	0	26	2				26	0	26	0		26	1	26	5
27	0	27	2		27	1	27	0	27	2				27	0	27	0		27	1	27	6
28	0	28	2		28	1	28	0	28	3				28	0	28	0		28	1	28	8
29	0	29	2		29	1	29	0	29	5				29	0	29	0		29	1	29	11
30	0	30	2		30	1	30	0	30	5				30	0	30	0		30	2	30	12
31	0	31	2		31	1	31	0	31	5				31	0	31	0		31	2	31	15
32	0	32	3		32	1	32	0	32	5				32	0	32	0		32	2	32	16
33	0	33	4		33	1	33	0	33	5				33	0	33	0		33	2	33	19
34	0	34	4		34	1	34	0	34	6				34	0	34	0		34	3	34	23
35	0	35	5		35	1	35	0	35	6				35	0	35	0		35	3	35	25
36	0	36	5		36	1	36	0	36	6				36	0	36	0		36	3	36	32
37	0	37	8		37	1	37	0	37	6				37	0	37	0		37	3	37	35
38	0	38	9		38	1	38	0	38	7				38	0	38	0		38	3	38	41
39	0	39	9		39	1	39	0	39	9				39	0	39	0		39	3	39	44
40	0	40	11		40	1	40	0	40	12				40	0	40	0		40	3	40	49
41	0	41	12		41	1	41	0	41	13				41	0	41	0		41	3	41	52
42	0	42	12		42	1	42	0	42	13				42	0	42	0		42	3	42	58
43	0	43	14		43	1	43	0	43	15				43	0	43	0		43	3	43	62
44	0	44	16		44	1	44	0	44	16				44	0	44	0		44	4	44	63
45	0	45	18		45	1	45	0	45	17				45	0	45	0		45	4	45	69
46	0	46	19		46	1	46	0	46	20				46	0	46	0		46	4	46	71
47	0	47	20		47	1	47	0	47	22				47	0	47	0		47	4	47	73
48	0	48	21		48	2	48	0	48	27				48	0	48	0		48	4	48	75
49	0	49	22		49	2	49	0	49	32				49	0	49	0		49	4	49	75
50	0	50	24		50	3	50	0	50	33				50	0	50	0		50	4	50	85
51	0	51	26		51	3	51	0	51	38				51	0	51	0		51	4	51	87
52	0	52	29		52	3	52	0	52	40				52	0	52	0		52	4	52	93
53	0	53	31		53	3	53	0	53	46				53	0	53	0		53	4	53	96
54	0	54	31		54	3	54	0	54	49				54	0	54	1		54	4	54	105
55	0	55	33		55	3	55	0	55	53				55	0	55	2		55	4	55	106
56	0	56	33		56	3	56	0	56	56				56	0	56	3		56	4	56	111
57	0	57	33		57	3	57	0	57	57				57	0	57	3		57	4	57	113
58	0	58	37		58	3	58	0	58	77				58	0	58	3		58	5	58	119
59	0	59	37		59	3	59	0	59	79				59	0	59	3		59	5	59	119
60	0	60	46		60	3	60	0	60	96				60	0	60	3		60	5	60	127
61	0	61	46		61	3	61	0	61	96				61	0	61	3		61	5	61	128
62	0	62	47		62	3	62	1	62	103				62	0	62	3		62	5	62	135
63	0	63	47		63	3	63	1	63	103				63	0	63	4		63	5	63	136
64	0	64	48		64	3	64	1	64	115				64	0	64	4		64	5	64	143
65	0	65	48		65	3	65	1	65	115				65	0	65	4		65	5	65	144
66	0	66	51		66	3	66	1	66	125				66	0	66	4		66	5	66	146
67	0	67	51		67	3	67	1	67	125				67	0	67	4		67	5	67	146
68	0	68	52		68	3	68	1	68	135				68	0	68	5		68	5	68	151
69	0	69	52		69	3	69	1	69	135				69	0	69	6		69	5	69	152
70	0	70	56		70	3	70	1	70	140				70	0	70	6		70	5	70	155
71	0	71	56		71	4	71	1	71	141				71	0	71	7		71	5	71	155
72	0	72	59		72	4	72	1	72	153				72	0	72	7		72	5	72	161
73	0	73	59		73	4	73	1	73	153				73	0	73	8		73	6	73	161
74	0	74	61		74	4	74	1	74	162				74	0	74	8		74	6	74	168
75	0	75	61		75	4	75	1	75	162				75	0	75	8		75	6	75	170
76	0	76	63		76	4	76	1	76	171				76	0	76	9		76	7	76	172
77	0	77	63		77	4	77	1	77	171				77	0	77	10		77	7	77	172
78	0	78	66		78	4	78	1	78	179				78	0	78	10		78	7	78	179
79	0	79	66		79	4	79	1	79	179				79	0	79	10		79	7	79	180
80	0	80	75		80	5	80	1	80	186				80	0	80	11		80	7	80	185
81	0	81	76		81	5	81	1	81	187				81	0	81	13		81	8	81	187
82	0	82	80		82	5	82	1	82	191				82	0	82	14		82	8	82	191
83	0	83	80		83	5	83	1	83	191				83	0	83	14		83	8	83	192
84	0	84	83		84	5	84	1	84	194				84	0	84	14		84	9	84	197
85	0	85	84		85	5	85	1	85	194				85	0	85	14		85	9	85	197
86	0	86	89		86	5	86	1	86	201				86	0	86	14		86	9	86	202
87	0	87	89		87	5	87	1	87	201				87	0	87	14		87	9	87	203
88	0	88	90		88	5	88	1	88	208				88	0	88	14		88	9	88	209
89	0	89	90		89	5	89	1	89	208				89	0	89	14		89	9	89	211
90	0	90	92		90	5	90	1	90	212				90	0	90	16		90	9	90	218
91	0	91	92		91	6	91	1	91	212				91	0	91	16		91	10	91	218
92	0	92	94		92	6	92	1	92	220				92	0	92	17		92	10	92	222
93	0	93	94		93	6	93	1	93	221				93	0	93	18		93	10	93	223
94	0	94	97		94	6	94	1	94	227				94	0	94	18		94	10	94	226
95	0	95	97		95	6	95	1	95	228				95	0	95	18		95	10	95	226
96	0	96	101		96	6	96	1	96	233				96	0	96	18		96	10	96	227
97	0	97	101		97	6	97	1	97	233				97	0	97	20		97	10	97	229
98	0	98	103		98	6	98	1	98	236				98	0	98	20		98	10	98	232
99	0	99	103		99	6	99	1	99	236				99	0	99	20		99	12	99	232
100	0	100	105		100	6	100	1	100	239				100	0	100	21		100	12	100	235
101	0	101	105		101	6	101	1	101	239				101	0	101	21		101	12	101	235
102	0	102	106		102	6	102	1	102	244				102	0	102	21		102	12	102	240
103	0	103	106		103	6	103	1	103	244				103	0	103	21		103	12	103	241
104	0	104	110		104	6	104	1	104	251				104	0	104	22		104	12	104	243
105	0	105	110		105	6	105	1	105	251				105	0	105	23		105	12	105	244
106	0	106	112		106	7	106	1	106	256				106	0	106	24		106	12	106	248
107	0	107	112		107	7	107	1	107	256				107	0	107	24		107	12	107	248
108	0	108	113		108	7	108	1	108	259				108	0	108	24		108	12	108	249
109	0	109	114		109	7	109	1	109	259				109	0	109	25		109	12	109	251
110	0	110	117		110	7	110	1	110	261				110	0	110	27		110	13	110	255
111	0	111	117		111	7	111	1	111	261				111	0	111	27		111	13	111	255
112	0	112	119		112	7	112	1	112	267				112	0	112	27		112	13	112	258
113	0	113	119		113	7	113	1	113	268				113	0	113	27		113	13	113	258
114	0	114	119		114	7	114	1	114	272				114	0	114	27		114	13	114	262
115	0	115	119		115	7	115	1	115	272				115	0	115	27		115	13	115	262
116	0	116	123		116	7	116	1	116	277				116	0	116	27		116	13	116	268
117	0	117	123		117	7	117	1	117	277				117	0	117	27		117	13	117	268
118	0	118	125		118	8	118	1	118	281				118	0	118	28		118	13	118	272
119	0	119	125		119	8	119	1	119	281				119	0	119	28		119	13	119	272
120	0	120	128		120	8	120	1	120	283				120	0	120	28		120	13	120	275
121	0	121	128		121	9	121	1	121	283				121	0	121	28		121	13	121	277
122	0	122	129		122	9	122	1	122	287				122	0	122	28		122	13	122	280
123	0	123	129		123	9	123	1	123	287				123	0	123	28		123	13	123	281
124	0	124	131		124	9	124	1	124	290				124	0	124	29		124	13	124	282
125	0	125	131		125	9	125	1	125	290				125	0	125	29		125	13	125	283
126	0	126	132		126	9	126	1	126	294				126	0	126	29		126	13	126	287
127	0	127	132		127	9	127	1	127	294				127	0	127	29		127	13	127	288
128	0	128	134		128	9	128	1	128	295				128	0	128	30		128	14	128	290
129	0	129	134		129	9	129	1	129	295				129	0	129	30		129	14	129	291
130	0	130	135		130	9	130	1	130	295				130	0	130	30		130	15	130	296
131	0	131	135		131	9	131	1	131	295				131	0	131	30		131	15	131	297
132	0	132	137		132	9	132	1	132	296				132	0	132	32		132	15	132	298
133	0	133	137		133	9	133	1	133	296				133	0	133	32		133	15	133	299
134	0	134	138		134	10	134	1	134	298				134	0	134	33		134	15	134	299
135	0	135	138		135	10	135	1	135	298				135	0	135	33		135	15	135	299
136	0	136	139		136	10	136	1	136	300				136	0	136	33		136	17	136	303
137	0	137	139		137	10	137	1	137	301				137	0	137	33		137	17	137	303
138	0	138	142		138	10	138	1	138	302				138	0	138	33		138	17	138	304
139	0	139	142		139	10	139	1	139	302				139	0	139	33		139	17	139	306
140	0	140	144		140	10	140	1						140	0	140	35		140	17	140	310
141	0	141	145		141	10	141	1						141	0	141	35		141	17	141	311
142	0	142	146		142	10	142	1						142	0	142	37		142	18	142	312
143	0	143	146		143	10	143	1						143	0	143	37		143	18	143	312
144	0	144	148		144	10	144	1						144	0	144	37		144	18	144	313
145	0	145	148		145	10	145	1						145	0	145	37		145	18	145	313
146	0	146	149		146	10	146	1						146	0	146	38		146	18	146	315
147	0	147	149		147	10	147	1						147	0	147	38		147	18	147	315
148	0	148	150		148	10	148	1						148	0	148	38		148	19	148	315
149	0	149	150		149	10	149	1						149	0	149	38		149	19	149	317
150	0	150	150		150	10	150	1						150	0	150	38		150	19	150	321
151	0	151	151		151	10	151	1						151	0	151	38		151	19	151	321
152	0	152	152		152	10	152	1						152	0	152	39		152	19	152	325
153	0	153	152		153	10	153	1						153	0	153	39		153	19	153	325
154	0	154	153		154	10	154	1						154	0	154	39		154	19	154	327
155	0	155	153		155	10	155	1						155	0	155	39		155	19	155	327
156	0	156	155		156	10	156	1						156	0	156	39		156	19	156	329
157	0	157	155		157	10	157	1						157	0	157	39		157	19	157	329
158	0	158	157		158	10	158	1						158	0	158	39		158	19	158	332
159	0	159	157		159	10	159	1						159	0	159	39		159	19	159	332
160	0	160	158		160	10	160	1						160	0	160	40		160	19	160	335
161	0	161	158		161	10	161	1						161	0	161	40		161	19	161	335
162	0	162	160		162	11	162	1						162	0	162	40		162	19	162	338
163	0	163	160		163	11	163	1						163	0	163	40		163	19	163	338
164	0	164	160		164	11	164	1						164	0	164	41		164	19	164	339
165	0	165	160		165	11	165	1						165	0	165	41		165	20	165	339
166	0	166	160		166	11	166	1						166	0	166	41		166	20	166	341
167	0	167	160		167	11	167	1						167	0	167	41		167	20	167	341
168	0	168	161		168	11	168	1						168	0	168	41		168	20	168	341
169	0	169	161		169	11	169	1						169	0	169	41		169	20	169	341
170	0	170	163		170	11	170	1						170	0	170	41		170	20	170	344
171	0	171	163		171	11	171	1						171	0	171	41		171	20	171	344
172	0	172	163		172	12	172	1						172	0	172	42		172	20	172	350
173	0	173	163		173	12	173	1						173	0	173	42		173	20	173	352
174	0	174	163		174	12	174	1						174	0	174	44		174	20	174	353
175	0	175	163		175	12	175	1						175	0	175	44		175	20	175	353
176	0	176	167		176	12	176	1						176	0	176	44		176	20	176	354
177	0	177	167		177	12	177	1						177	0	177	44		177	20	177	354
178	0	178	168		178	12	178	1						178	0	178	45		178	20	178	356
179	0	179	168		179	12	179	1						179	0	179	46		179	20	179	357
180	0	180	169		180	12	180	1						180	0	180	46		180	20	180	361
181	0	181	169		181	12	181	1						181	0	181	46		181	20	181	361
182	0	182	169		182	12	182	1						182	0	182	46		182	20	182	363
183	0	183	169		183	12	183	1						183	0	183	46		183	20	183	363
184	0	184	170		184	12	184	1						184	0	184	47		184	20	184	363
185	0	185	170		185	12	185	1						185	0	185	47		185	20	185	363
186	0	186	172		186	12	186	1						186	0	186	47		186	21	186	363
187	0	187	172		187	12	187	1						187	0	187	47		187	21	187	363
188	0	188	172		188	12	188	1						188	0	188	47		188	21	188	364
189	0	189	172		189	12	189	1						189	0	189	47		189	21	189	364
190	0	190	172		190	12	190	1						190	0	190	48		190	21	190	366
191	0	191	172		191	12	191	1						191	0	191	49		191	21	191	366
192	0	192	175		192	12	192	1						192	0	192	50		192	22	192	366
193	0	193	175		193	12	193	1						193	0	193	50		193	22	193	367
194	0	194	175		194	12	194	1						194	0	194	50		194	22	194	367
195	0	195	175		195	12	195	1						195	0	195	50		195	22	195	367
196	0	196	176		196	12	196	1						196	0	196	50		196	23	196	368
197	0	197	176		197	12	197	1						197	0	197	50		197	23	197	368
198	0	198	179		198	12	198	1						198	0	198	50		198	24	198	369
199	0	199	179		199	12	199	1						199	0	199	50		199	24	199	369
200	0	200	179		200	12	200	1						200	0	200	51		200	24
201	0	201	179		201	12	201	1						201	0	201	51		201	24
202	0	202	182		202	12	202	1						202	0	202	51		202	24
203	0	203	182		203	12	203	1						203	0	203	51		203	24
204	0	204	182		204	12	204	1						204	0	204	51		204	24
205	0	205	183		205	12	205	1						205	0	205	51		205	24
206	0	206	183		206	12	206	1						206	0	206	51		206	25
207	0	207	183		207	12	207	1						207	0	207	51		207	26
208	0	208	184		208	13	208	1						208	0	208	51		208	27
209	0	209	184		209	13	209	1						209	0	209	51		209	27
210	0	210	186		210	13	210	1						210	0	210	51		210	28
211	0	211	187		211	13	211	1						211	0	211	51		211	28
212	0	212	187		212	13	212	1						212	0	212	51		212	28
213	0	213	187		213	13	213	1						213	0	213	51		213	28
214	0	214	189		214	13	214	1						214	0	214	52		214	28
215	0	215	189		215	13	215	1						215	0	215	52		215	28
216	0	216	189		216	13	216	1						216	0	216	54		216	28
217	0	217	190		217	13	217	1						217	0	217	54		217	28
218	0	218	190		218	13	218	1						218	0	218	55		218	28
219	0	219	190		219	13	219	1						219	0	219	55		219	28
220	0	220	190		220	13	220	1						220	0	220	55		220	28
221	0	221	190		221	13	221	1						221	0	221	55		221	28
222	0	222	193		222	13	222	1						222	0	222	55		222	28
223	0	223	193		223	13	223	1						223	0	223	55		223	28
224	0	224	194		224	13	224	1						224	0	224	55		224	28
225	0	225	194		225	13	225	1						225	0	225	55		225	28
226	0	226	196		226	14	226	1						226	0	226	55		226	28
227	0	227	196		227	14	227	1						227	0	227	55		227	28
228	0	228	196		228	15	228	1						228	0	228	56		228	29
229	0	229	196		229	15	229	1						229	0	229	56		229	29
230	0	230	197		230	15	230	1						230	0	230	57		230	30
231	0	231	197		231	15	231	1						231	0	231	57		231	30
232	0	232	199		232	15	232	1						232	0	232	57		232	30
233	0	233	199		233	15	233	1						233	0	233	57		233	30
234	0	234	199		234	15	234	1						234	0	234	59		234	30
235	0	235	199		235	15	235	1						235	0	235	59		235	30
236	0	236	201		236	16	236	1						236	0	236	60		236	30
237	0	237	201		237	16	237	1						237	0	237	60		237	30
238	0	238	201		238	16	238	1						238	0	238	61		238	30
239	0	239	201		239	16	239	1						239	0	239	61		239	30
240	0	240	202		240	16	240	1						240	0	240	61		240	30
241	0	241	202		241	16	241	1						241	0	241	61		241	30
242	0				242	16	242	1						242	0	242	61		242	30
243	0				243	16	243	1						243	0	243	61		243	30
244	0				244	17	244	1						244	0	244	63		244	30
245	0				245	17	245	1						245	0	245	63		245	30
246	0				246	17	246	1						246	0	246	64		246	30
247	0				247	17	247	1						247	0	247	64		247	30
248	0				248	17	248	1						248	0	248	64		248	30
249	0				249	17	249	1						249	0	249	64		249	30
250	0				250	17	250	1						250	0	250	64		250	30
251	0				251	17	251	1						251	0	251	64		251	30
252	0				252	18	252	1						252	0	252	64		252	31
253	0				253	18	253	1						253	0	253	64		253	31
254	0				254	18	254	1						254	0	254	64		254	31
255	0				255	18	255	1						255	0	255	64		255	31
256	0				256	18	256	1						256	0	256	66		256	31
257	0				257	18	257	1						257	0	257	66		257	31
258	0				258	18	258	1						258	0	258	66		258	31
259	0				259	18	259	1						259	0	259	66		259	31
260	0				260	18	260	1						260	0	260	66		260	31
261	0				261	19	261	1						261	0	261	66		261	31
262	0				262	19								262	0	262	66		262	32
263	0				263	19								263	0	263	66		263	32
264	0				264	19								264	0	264	67		264	32
265	0				265	19								265	0	265	67		265	32
266	0				266	19								266	0	266	67		266	32
267	0				267	19								267	0	267	67		267	32
268	0				268	19								268	0	268	67		268	33
269	0				269	19								269	0	269	67		269	33
270	0				270	19								270	0	270	67		270	33
271	0				271	19								271	0	271	67		271	33
272	0				272	19								272	0	272	68		272	34
273	0				273	19								273	0	273	68		273	34
274	0				274	19								274	0	274	69		274	34
275	0				275	19								275	0	275	69		275	34
276	0				276	19								276	0	276	69		276	34
277	0				277	19								277	0	277	69		277	34
278	0				278	19								278	0	278	69		278	34
279	0				279	19								279	0	279	69		279	34
280	0				280	19								280	0	280	70		280	34
281	0				281	19								281	0	281	70		281	34
282	0				282	19								282	0	282	70		282	34
283	0				283	19								283	0	283	70		283	34
284	0				284	19								284	0	284	70		284	34
285	0				285	19								285	0	285	70		285	34
286	0				286	19								286	0	286	70		286	35
287	0				287	19								287	0	287	70		287	35
288	0				288	19								288	0	288	71		288	35
289	0				289	19								289	0	289	72		289	35
290	0				290	19								290	0	290	73		290	35
291	0				291	19								291	0	291	73		291	35
292	0				292	19								292	0	292	73		292	35
293	0				293	19								293	0	293	73		293	35
294	0				294	19								294	0	294	74		294	35
295	0				295	19								295	0	295	74		295	35
296	0				296	19								296	0	296	75		296	35
297	0				297	19								297	0	297	75		297	35
298	0				298	19								298	0	298	75		298	36
299	0				299	19								299	0	299	75		299	36
300	0				300	19								300	0	300	75		300	36
301	0				301	19								301	0	301	75		301	36
302	0				302	19								302	0	302	75		302	36
303	0				303	19								303	0	303	75		303	36
304	0				304	19								304	0	304	76		304	36
305	0				305	19								305	0	305	76		305	36
306	0				306	19								306	0	306	76		306	36
307	0				307	19								307	0	307	77		307	36
308	0				308	19								308	0	308	77		308	36
309	0				309	19								309	0	309	77		309	36
310	0				310	19								310	0	310	78		310	37
311	0				311	19								311	0	311	78		311	37
312	0				312	19								312	0	312	78		312	37
313	0				313	19								313	0	313	78		313	38
314	0				314	19								314	0	314	78		314	38
315	0				315	19								315	0	315	78		315	38
316	0				316	19								316	0	316	78		316	38
317	0				317	19								317	0	317	78		317	38
318	0				318	19								318	0	318	78		318	38
319	0				319	19								319	0	319	78		319	38
320	0				320	19								320	0	320	78		320	38
321	0				321	19								321	0	321	79		321	38
322	0				322	19								322	0	322	79		322	38
323	0				323	19								323	0	323	79		323	38
324	0				324	19								324	0	324	79		324	39
325	0				325	19								325	0	325	79		325	39
326	0				326	19								326	0	326	79		326	40
327	0				327	19								327	0	327	79		327	40
328	0				328	19								328	0	328	79		328	41
329	0				329	19								329	0	329	79		329	41
330	0				330	19								330	0	330	79		330	42
331	0				331	19								331	0	331	79		331	43
332	0				332	19								332	0	332	79		332	43
333	0				333	19								333	0	333	79		333	43
334	0				334	19								334	0	334	79		334	43
335	0				335	19								335	0	335	79		335	43
336	0				336	19								336	0	336	79		336	43
337	0				337	19								337	0	337	79		337	43
338	0				338	19								338	0	338	79		338	43
339	0				339	19								339	0	339	79		339	43
340	0				340	19								340	0	340	80		340	43
341	0				341	19								341	0	341	80		341	43
342	0				342	19								342	0	342	80		342	43
343	0				343	19								343	0	343	80		343	43
344	0				344	19								344	0	344	80		344	45
345	0				345	19								345	0	345	80		345	45
346	0				346	19								346	0	346	80		346	45
347	0				347	19								347	0	347	80		347	45
348	0				348	19								348	0	348	80		348	45
349	0				349	19								349	0	349	80		349	45
350	0				350	19								350		350	80		350	46
351	0				351	19								351		351	80		351	46
352	0				352	19								352		352	80		352	46
353	0				353	19								353		353	80		353	46
354	0				354	19								354		354	81		354	46
355	0				355	19								355		355	81		355	46
356	0				356	19								356		356	81		356	46
357	0				357	19								357		357	81		357	46
358	0				358	19								358		358	81		358	46
359	0				359	19								359		359	81		359	46
360	0				360	19								360		360	82		360	46
361	0				361	19								361		361	82		361	46
362	0				362	19								362		362	82		362	46
363	0				363	19								363		363	82		363	46
364	0				364	19								364		364	82		364	46
365	0				365	19								365		365	82		365	46
366	0				366	19								366		366	82		366	46
367	0				367	19								367		367	82		367	46
368	0				368	19								368		368	82		368	47
369	0				369	19								369		369	82		369	47
370	0				370	19								370		370	82		370	48
371	0				371	19								371		371	82		371	48
372	0				372	19								372		372	82		372	48
373	0				373	19								373		373	82		373	49
374	0				374	19								374		374	82		374	49
375	0				375	19								375		375	82		375	49
376	0				376	19								376		376	82		376	51
377	0				377	19								377		377	82		377	51
378	0				378	19								378		378	82		378	51
379	0				379	19								379		379	82		379	51
380	0				380	20								380		380	82		380	51
381	0				381	20								381		381	82		381	51
382	0				382	20								382		382	84		382	51
383	0				383	20								383		383	84		383	51
384	0				384	20								384		384	84		384	51
385	0				385	20								385		385	84		385	51
386	0				386	20								386		386	84		386	51
387	0				387	20								387		387	84		387	51
388	0				388	20								388		388	84		388	51
389	0				389	20								389		389	84		389	51
390	0				390	20								390		390	84		390	52
391	0				391	20								391		391	84		391	52
392	0				392	20								392		392	84		392	52
393	0				393	20								393		393	84		393	52
394	0				394	20								394		394	84		394	52
395	0				395	20								395		395	84		395	52
396	0				396	20								396		396	84		396	53
397	0				397	20								397		397	84		397	53
398	0				398	21										398	85
399	0				399	21										399	85
400	0				400	21										400	85
401	0				401	21										401	85
402	0				402	21										402	85
403	0				403	21										403	85
404	0				404	21										404	85
405	0				405	21										405	85
406	0				406	21										406	85
407	0				407	21										407	85
408	0				408	21										408	85
409	0				409	21										409	85
410	0				410	21										410	85
411	0				411	21										411	85
412	0				412	21										412	85
413	0				413	21										413	85
414	0				414	21										414	85
415	0				415	21										415	85
416	0				416	21										416	85
417	0				417	21										417	85
418	0				418	21										418	85
419	0				419	21										419	85
420	0				420	21										420	85
421	0				421	21										421	85
422	0				422	21										422	85
423	0				423	21										423	85
424	0				424	21										424	85
425	0				425	21										425	85
426	0				426	21										426	85
427	0				427	21										427	85
428	0				428	21										428	85
429	0				429	21										429	85
430	0				430	22										430	86
431	0				431	22										431	86

## Sheet: Fig 7-Supp 1E
XMAP215 constructs added to gTuRC nucleation assay
					Data set 1								Data set 2										Data set 3
gTuRC only		gTuRC + wt XMAP215		gTuRC + TOG5-CT					gTuRC only		gTuRC + wt XMAP215		gTuRC + TOG5-CT		gTuRC + TOG1-4					gTuRC only		gTuRC + wt XMAP215		gTuRC + TOG1-4
Time (seconds)	Probability of nucleation	Time (seconds)	Probability of nucleation	Time (seconds)	Probability of nucleation				Time (seconds)	Probability of nucleation	Time (seconds)	Probability of nucleation	Time (seconds)	Probability of nucleation	Time (seconds)	Probability of nucleation				Time (seconds)	Probability of nucleation	Time (seconds)	Probability of nucleation	Time (seconds)	Probability of nucleation
0	0	0	0.0339321	0	0				0	0	0	0.00757576	0	0	0	0				0	0	0	0.00892857	0	0
1	0	1	0.0359281	1	0				1	0	1	0.00757576	1	0	1	0				1	0	1	0.00892857	1	0
2	0	2	0.0379242	2	0				2	0	2	0.00757576	2	0	2	0				2	0	2	0.00892857	2	0
3	0	3	0.0419162	3	0				3	0	3	0.00757576	3	0	3	0				3	0	3	0.00892857	3	0
4	0	4	0.0419162	4	0				4	0	4	0.00757576	4	0	4	0				4	0	4	0.00892857	4	0
5	0	5	0.0439122	5	0				5	0	5	0.00757576	5	0	5	0				5	0	5	0.0133929	5	0
6	0	6	0.0538922	6	0				6	0	6	0.00757576	6	0	6	0				6	0	6	0.0133929	6	0
7	0	7	0.0558882	7	0				7	0	7	0.00757576	7	0	7	0				7	0	7	0.0178571	7	0
8	0	8	0.0598802	8	0				8	0	8	0.00757576	8	0	8	0				8	0	8	0.0223214	8	0
9	0	9	0.0638723	9	0				9	0	9	0.0151515	9	0	9	0				9	0	9	0.0223214	9	0
10	0	10	0.0718563	10	0				10	0	10	0.0151515	10	0	10	0				10	0	10	0.0223214	10	0
11	0	11	0.0738523	11	0				11	0	11	0.0151515	11	0	11	0				11	0	11	0.0223214	11	0
12	0	12	0.0778443	12	0				12	0	12	0.0151515	12	0	12	0				12	0	12	0.0223214	12	0
13	0	13	0.0818363	13	0				13	0	13	0.0151515	13	0	13	0				13	0	13	0.03125	13	0
14	0	14	0.0898204	14	0				14	0	14	0.0151515	14	0	14	0				14	0	14	0.03125	14	0
15	0	15	0.0938124	15	0				15	0	15	0.0151515	15	0	15	0				15	0	15	0.03125	15	0
16	0	16	0.101796	16	0				16	0	16	0.0227273	16	0	16	0				16	0	16	0.03125	16	0
17	0	17	0.111776	17	0				17	0	17	0.030303	17	0	17	0				17	0	17	0.03125	17	0
18	0	18	0.11976	18	0				18	0	18	0.030303	18	0	18	0				18	0	18	0.0357143	18	0
19	0	19	0.123752	19	0				19	0	19	0.0378788	19	0	19	0				19	0	19	0.0357143	19	0
20	0	20	0.135729	20	0				20	0	20	0.0530303	20	0	20	0				20	0	20	0.0401786	20	0
21	0	21	0.143713	21	0				21	0.00757576	21	0.0530303	21	0	21	0				21	0	21	0.0446429	21	0
22	0	22	0.149701	22	0				22	0.00757576	22	0.0530303	22	0	22	0				22	0	22	0.0491071	22	0
23	0	23	0.157685	23	0				23	0.00757576	23	0.0530303	23	0	23	0				23	0	23	0.0491071	23	0
24	0	24	0.169661	24	0				24	0.00757576	24	0.0530303	24	0	24	0				24	0	24	0.0535714	24	0
25	0	25	0.179641	25	0				25	0.00757576	25	0.0530303	25	0	25	0				25	0	25	0.0580357	25	0
26	0	26	0.189621	26	0				26	0.00757576	26	0.0681818	26	0	26	0				26	0	26	0.0580357	26	0
27	0	27	0.193613	27	0				27	0.00757576	27	0.0757576	27	0	27	0				27	0	27	0.0625	27	0
28	0	28	0.205589	28	0				28	0.00757576	28	0.0757576	28	0	28	0				28	0	28	0.0714286	28	0
29	0	29	0.223553	29	0				29	0.00757576	29	0.0833333	29	0	29	0				29	0	29	0.0758929	29	0.00446429
30	0	30	0.247505	30	0				30	0.00757576	30	0.0833333	30	0	30	0				30	0	30	0.0758929	30	0.00446429
31	0	31	0.247505	31	0				31	0.00757576	31	0.0984848	31	0	31	0				31	0	31	0.0758929	31	0.00446429
32	0	32	0.261477	32	0				32	0.00757576	32	0.0984848	32	0	32	0				32	0	32	0.0803571	32	0.00446429
33	0	33	0.263473	33	0				33	0.00757576	33	0.0984848	33	0	33	0				33	0	33	0.0892857	33	0.00446429
34	0	34	0.287425	34	0				34	0.00757576	34	0.113636	34	0	34	0				34	0	34	0.09375	34	0.00446429
35	0	35	0.289421	35	0				35	0.00757576	35	0.121212	35	0	35	0				35	0	35	0.102679	35	0.00446429
36	0	36	0.319361	36	0				36	0.00757576	36	0.136364	36	0	36	0				36	0	36	0.102679	36	0.00446429
37	0	37	0.319361	37	0				37	0.00757576	37	0.136364	37	0	37	0				37	0	37	0.116071	37	0.00446429
38	0	38	0.331337	38	0				38	0.00757576	38	0.151515	38	0	38	0				38	0	38	0.125	38	0.00446429
39	0	39	0.331337	39	0				39	0.00757576	39	0.159091	39	0	39	0				39	0	39	0.138393	39	0.00446429
40	0	40	0.349301	40	0				40	0.00757576	40	0.159091	40	0	40	0				40	0	40	0.147321	40	0.00446429
41	0	41	0.349301	41	0				41	0.00757576	41	0.174242	41	0	41	0				41	0	41	0.15625	41	0.00446429
42	0	42	0.359281	42	0				42	0.00757576	42	0.181818	42	0	42	0				42	0	42	0.15625	42	0.00446429
43	0	43	0.359281	43	0				43	0.00757576	43	0.181818	43	0	43	0				43	0	43	0.165179	43	0.00892857
44	0	44	0.367265	44	0				44	0.00757576	44	0.189394	44	0	44	0				44	0	44	0.169643	44	0.00892857
45	0	45	0.371257	45	0				45	0.00757576	45	0.189394	45	0	45	0				45	0	45	0.183036	45	0.00892857
46	0	46	0.393214	46	0				46	0.00757576	46	0.19697	46	0	46	0				46	0	46	0.191964	46	0.00892857
47	0	47	0.393214	47	0				47	0.00757576	47	0.204545	47	0	47	0				47	0	47	0.196429	47	0.00892857
48	0	48	0.401198	48	0				48	0.00757576	48	0.219697	48	0	48	0				48	0.00446429	48	0.205357	48	0.00892857
49	0	49	0.401198	49	0				49	0.00757576	49	0.227273	49	0	49	0				49	0.00446429	49	0.205357	49	0.00892857
50	0	50	0.427146	50	0.00199601				50	0.00757576	50	0.234848	50	0	50	0				50	0.00446429	50	0.214286	50	0.00892857
51	0	51	0.427146	51	0.00199601				51	0.00757576	51	0.242424	51	0	51	0				51	0.00446429	51	0.223214	51	0.00892857
52	0	52	0.443114	52	0.00199601				52	0.00757576	52	0.25	52	0	52	0				52	0.00446429	52	0.227679	52	0.00892857
53	0	53	0.443114	53	0.00199601				53	0.00757576	53	0.25	53	0	53	0				53	0.00446429	53	0.236607	53	0.00892857
54	0	54	0.45509	54	0.00199601				54	0.00757576	54	0.287879	54	0	54	0				54	0.00446429	54	0.245536	54	0.00892857
55	0	55	0.457086	55	0.00199601				55	0.0151515	55	0.310606	55	0	55	0				55	0.00446429	55	0.254464	55	0.00892857
56	0	56	0.473054	56	0.00199601				56	0.0151515	56	0.310606	56	0	56	0				56	0.00446429	56	0.263393	56	0.00892857
57	0	57	0.473054	57	0.00199601				57	0.0151515	57	0.310606	57	0	57	0				57	0.00446429	57	0.28125	57	0.00892857
58	0	58	0.49501	58	0.00199601				58	0.0151515	58	0.333333	58	0	58	0				58	0.00892857	58	0.290179	58	0.00892857
59	0	59	0.49501	59	0.00199601				59	0.0151515	59	0.348485	59	0	59	0				59	0.00892857	59	0.308036	59	0.00892857
60	0	60	0.51497	60	0.00199601				60	0.0151515	60	0.356061	60	0	60	0				60	0.00892857	60	0.308036	60	0.00892857
61	0	61	0.51497	61	0.00399202				61	0.0151515	61	0.363636	61	0	61	0				61	0.00892857	61	0.321429	61	0.0133929
62	0	62	0.528942	62	0.00399202				62	0.0227273	62	0.363636	62	0	62	0				62	0.00892857	62	0.325893	62	0.0133929
63	0	63	0.528942	63	0.00399202				63	0.0227273	63	0.378788	63	0	63	0				63	0.00892857	63	0.339286	63	0.0133929
64	0.00199601	64	0.54491	64	0.00399202				64	0.0227273	64	0.378788	64	0	64	0				64	0.00892857	64	0.339286	64	0.0133929
65	0.00199601	65	0.546906	65	0.00399202				65	0.0227273	65	0.378788	65	0	65	0				65	0.00892857	65	0.352679	65	0.0178571
66	0.00199601	66	0.562874	66	0.00399202				66	0.0227273	66	0.386364	66	0	66	0				66	0.00892857	66	0.357143	66	0.0178571
67	0.00199601	67	0.562874	67	0.00399202				67	0.0227273	67	0.416667	67	0	67	0				67	0.00892857	67	0.379464	67	0.0178571
68	0.00199601	68	0.578842	68	0.00399202				68	0.0227273	68	0.424242	68	0	68	0				68	0.00892857	68	0.379464	68	0.0178571
69	0.00199601	69	0.578842	69	0.00399202				69	0.0227273	69	0.431818	69	0	69	0				69	0.00892857	69	0.392857	69	0.0178571
70	0.00199601	70	0.59481	70	0.00399202				70	0.0227273	70	0.439394	70	0	70	0				70	0.00892857	70	0.392857	70	0.0178571
71	0.00199601	71	0.598802	71	0.00399202				71	0.0227273	71	0.44697	71	0	71	0				71	0.00892857	71	0.40625	71	0.0178571
72	0.00199601	72	0.61477	72	0.00399202				72	0.030303	72	0.462121	72	0	72	0				72	0.00892857	72	0.40625	72	0.0178571
73	0.00199601	73	0.616766	73	0.00399202				73	0.030303	73	0.484848	73	0	73	0				73	0.00892857	73	0.419643	73	0.0178571
74	0.00199601	74	0.630739	74	0.00399202				74	0.030303	74	0.507576	74	0	74	0				74	0.00892857	74	0.424107	74	0.0178571
75	0.00199601	75	0.630739	75	0.00399202				75	0.030303	75	0.522727	75	0	75	0				75	0.00892857	75	0.428571	75	0.0178571
76	0.00199601	76	0.640719	76	0.00399202				76	0.030303	76	0.537879	76	0	76	0				76	0.00892857	76	0.4375	76	0.0178571
77	0.00199601	77	0.640719	77	0.00399202				77	0.030303	77	0.560606	77	0	77	0				77	0.00892857	77	0.464286	77	0.0223214
78	0.00199601	78	0.656687	78	0.00399202				78	0.030303	78	0.575758	78	0	78	0				78	0.00892857	78	0.464286	78	0.0223214
79	0.00199601	79	0.656687	79	0.00399202				79	0.030303	79	0.583333	79	0	79	0				79	0.00892857	79	0.473214	79	0.0223214
80	0.00199601	80	0.666667	80	0.00399202				80	0.030303	80	0.583333	80	0	80	0				80	0.00892857	80	0.477679	80	0.0223214
81	0.00199601	81	0.666667	81	0.00399202				81	0.030303	81	0.583333	81	0	81	0				81	0.00892857	81	0.5	81	0.0223214
82	0.00199601	82	0.678643	82	0.00399202				82	0.030303	82	0.583333	82	0	82	0.00757576				82	0.00892857	82	0.504464	82	0.0223214
83	0.00199601	83	0.680639	83	0.00399202				83	0.030303	83	0.590909	83	0	83	0.00757576				83	0.00892857	83	0.517857	83	0.0223214
84	0.00199601	84	0.706587	84	0.00399202				84	0.030303	84	0.590909	84	0	84	0.00757576				84	0.00892857	84	0.517857	84	0.0267857
85	0.00199601	85	0.706587	85	0.00399202				85	0.030303	85	0.598485	85	0	85	0.00757576				85	0.0133929	85	0.535714	85	0.0267857
86	0.00199601	86	0.720559	86	0.00399202				86	0.030303	86	0.613636	86	0	86	0.00757576				86	0.0133929	86	0.540179	86	0.0267857
87	0.00199601	87	0.720559	87	0.00399202				87	0.030303	87	0.621212	87	0	87	0.00757576				87	0.0133929	87	0.571429	87	0.0267857
88	0.00199601	88	0.728543	88	0.00399202				88	0.030303	88	0.628788	88	0	88	0.0151515				88	0.0133929	88	0.575893	88	0.03125
89	0.00199601	89	0.732535	89	0.00399202				89	0.030303	89	0.628788	89	0	89	0.0227273				89	0.0133929	89	0.589286	89	0.03125
90	0.00199601	90	0.752495	90	0.00399202				90	0.0378788	90	0.636364	90	0.00757576	90	0.0227273				90	0.0133929	90	0.589286	90	0.03125
91	0.00199601	91	0.752495	91	0.00399202				91	0.0378788	91	0.651515	91	0.00757576	91	0.0227273				91	0.0133929	91	0.589286	91	0.03125
92	0.00199601	92	0.762475	92	0.00399202				92	0.0378788	92	0.666667	92	0.00757576	92	0.0227273				92	0.0133929	92	0.589286	92	0.03125
93	0.00199601	93	0.764471	93	0.00399202				93	0.0378788	93	0.666667	93	0.00757576	93	0.0227273				93	0.0133929	93	0.602679	93	0.03125
94	0.00199601	94	0.784431	94	0.00598802				94	0.0378788	94	0.674242	94	0.00757576	94	0.0227273				94	0.0133929	94	0.602679	94	0.03125
95	0.00199601	95	0.784431	95	0.00598802				95	0.0378788	95	0.674242	95	0.00757576	95	0.0227273				95	0.0133929	95	0.607143	95	0.03125
96	0.00199601	96	0.794411	96	0.00598802				96	0.0378788	96	0.681818	96	0.00757576	96	0.0227273				96	0.0133929	96	0.607143	96	0.03125
97	0.00199601	97	0.796407	97	0.00598802				97	0.0378788	97	0.689394	97	0.00757576	97	0.0227273				97	0.0133929	97	0.629464	97	0.03125
98	0.00199601	98	0.804391	98	0.00598802				98	0.0378788	98	0.689394	98	0.00757576	98	0.0227273				98	0.0133929	98	0.633929	98	0.03125
99	0.00199601	99	0.804391	99	0.00598802				99	0.0378788	99	0.69697	99	0.00757576	99	0.0227273				99	0.0133929	99	0.647321	99	0.03125
100	0.00199601	100	0.816367	100	0.00598802				100	0.0454545	100	0.704545	100	0.00757576	100	0.0227273				100	0.0133929	100	0.647321	100	0.03125
101	0.00199601	101	0.818363	101	0.00598802				101	0.0454545	101	0.704545	101	0.00757576	101	0.0227273				101	0.0133929	101	0.65625	101	0.03125
102	0.00199601	102	0.830339	102	0.00598802				102	0.0454545	102	0.727273	102	0.00757576	102	0.0227273				102	0.0133929	102	0.65625	102	0.03125
103	0.00199601	103	0.830339	103	0.00598802				103	0.0454545	103	0.727273	103	0.00757576	103	0.0227273				103	0.0133929	103	0.65625	103	0.03125
104	0.00199601	104	0.836327	104	0.00598802				104	0.0454545	104	0.734848	104	0.00757576	104	0.0227273				104	0.0133929	104	0.665179	104	0.03125
105	0.00199601	105	0.838323	105	0.00598802				105	0.0454545	105	0.734848	105	0.00757576	105	0.0227273				105	0.0133929	105	0.678571	105	0.03125
106	0.00199601	106	0.846307	106	0.00598802				106	0.0454545	106	0.75	106	0.00757576	106	0.030303				106	0.0133929	106	0.678571	106	0.03125
107	0.00199601	107	0.848303	107	0.00598802				107	0.0454545	107	0.75	107	0.00757576	107	0.030303				107	0.0133929	107	0.6875	107	0.03125
108	0.00199601	108	0.858283	108	0.00598802				108	0.0454545	108	0.75	108	0.00757576	108	0.030303				108	0.0133929	108	0.691964	108	0.0357143
109	0.00199601	109	0.858283	109	0.00798403				109	0.0454545	109	0.75	109	0.00757576	109	0.030303				109	0.0133929	109	0.700893	109	0.0357143
110	0.00199601	110	0.862275	110	0.00798403				110	0.0454545	110	0.765152	110	0.00757576	110	0.030303				110	0.0133929	110	0.705357	110	0.0357143
111	0.00199601	111	0.862275	111	0.00798403				111	0.0454545	111	0.765152	111	0.00757576	111	0.030303				111	0.0133929	111	0.727679	111	0.0357143
112	0.00199601	112	0.876248	112	0.00798403				112	0.0454545	112	0.772727	112	0.00757576	112	0.030303				112	0.0133929	112	0.732143	112	0.0357143
113	0.00199601	113	0.878244	113	0.00798403				113	0.0454545	113	0.772727	113	0.00757576	113	0.030303				113	0.0133929	113	0.745536	113	0.0357143
114	0.00199601	114	0.884232	114	0.00798403				114	0.0454545	114	0.787879	114	0.0151515	114	0.030303				114	0.0133929	114	0.75	114	0.0401786
115	0.00199601	115	0.884232	115	0.00798403				115	0.0454545	115	0.787879	115	0.0151515	115	0.030303				115	0.0133929	115	0.758929	115	0.0401786
116	0.00199601	116	0.898204	116	0.00798403				116	0.0454545	116	0.795455	116	0.0151515	116	0.030303				116	0.0133929	116	0.763393	116	0.0401786
117	0.00199601	117	0.898204	117	0.00798403				117	0.0454545	117	0.795455	117	0.0151515	117	0.030303				117	0.0133929	117	0.794643	117	0.0401786
118	0.00199601	118	0.904192	118	0.00798403				118	0.0454545	118	0.80303	118	0.0151515	118	0.030303				118	0.0133929	118	0.794643	118	0.0401786
119	0.00199601	119	0.904192	119	0.00798403				119	0.0454545	119	0.80303	119	0.0151515	119	0.030303				119	0.0133929	119	0.803571	119	0.0401786
120	0.00199601	120	0.918164	120	0.00798403				120	0.0454545	120	0.810606	120	0.0151515	120	0.030303				120	0.0133929	120	0.803571	120	0.0401786
121	0.00399202	121	0.92016	121	0.00798403				121	0.0454545	121	0.810606	121	0.0151515	121	0.030303				121	0.0133929	121	0.816964	121	0.0401786
122	0.00399202	122	0.928144	122	0.00798403				122	0.0454545	122	0.818182	122	0.0151515	122	0.030303				122	0.0133929	122	0.816964	122	0.0401786
123	0.00399202	123	0.928144	123	0.00798403				123	0.0454545	123	0.818182	123	0.0151515	123	0.030303				123	0.0133929	123	0.839286	123	0.0401786
124	0.00399202	124	0.938124	124	0.00798403				124	0.0454545	124	0.825758	124	0.0151515	124	0.030303				124	0.0133929	124	0.839286	124	0.0446429
125	0.00399202	125	0.938124	125	0.00798403				125	0.0454545	125	0.825758	125	0.0151515	125	0.030303				125	0.0133929	125	0.852679	125	0.0446429
126	0.00399202	126	0.954092	126	0.00798403				126	0.0454545	126	0.871212	126	0.0151515	126	0.030303				126	0.0133929	126	0.852679	126	0.0446429
127	0.00399202	127	0.954092	127	0.00798403				127	0.0454545	127	0.871212	127	0.0151515	127	0.030303				127	0.0133929	127	0.852679	127	0.0446429
128	0.00399202	128	0.962076	128	0.00798403				128	0.0454545	128	0.886364	128	0.0227273	128	0.030303				128	0.0133929	128	0.852679	128	0.0491071
129	0.00399202	129	0.962076	129	0.00798403				129	0.0530303	129	0.886364	129	0.0227273	129	0.030303				129	0.0133929	129	0.861607	129	0.0491071
130	0.00399202	130	0.964072	130	0.00798403				130	0.0530303	130	0.893939	130	0.0227273	130	0.030303				130	0.0133929	130	0.866071	130	0.0491071
131	0.00399202	131	0.966068	131	0.00798403				131	0.0530303	131	0.901515	131	0.0227273	131	0.030303				131	0.0133929	131	0.879464	131	0.0491071
132	0.00399202	132	0.968064	132	0.00798403				132	0.0530303	132	0.916667	132	0.0227273	132	0.030303				132	0.0133929	132	0.879464	132	0.0491071
133	0.00399202	133	0.968064	133	0.00998004				133	0.0530303	133	0.916667	133	0.0227273	133	0.030303				133	0.0133929	133	0.883929	133	0.0491071
134	0.00399202	134	0.972056	134	0.00998004				134	0.0530303	134	0.931818	134	0.0227273	134	0.030303				134	0.0133929	134	0.883929	134	0.0491071
135	0.00399202	135	0.972056	135	0.00998004				135	0.0530303	135	0.931818	135	0.0227273	135	0.030303				135	0.0133929	135	0.90625	135	0.0491071
136	0.00399202	136	0.974052	136	0.00998004				136	0.0530303	136	0.931818	136	0.0227273	136	0.030303				136	0.0133929	136	0.90625	136	0.0491071
137	0.00399202	137	0.974052	137	0.011976				137	0.0530303	137	0.931818	137	0.0227273	137	0.030303				137	0.0133929	137	0.924107	137	0.0491071
138	0.00399202	138	0.976048	138	0.011976				138	0.0530303	138	0.939394	138	0.0227273	138	0.030303				138	0.0133929	138	0.924107	138	0.0491071
139	0.00399202	139	0.978044	139	0.011976				139	0.0530303	139	0.939394	139	0.0227273	139	0.030303				139	0.0133929	139	0.924107	139	0.0491071
140	0.00399202	140	0.982036	140	0.011976				140	0.0530303	140	0.954545	140	0.0227273	140	0.030303				140	0.0133929	140	0.924107	140	0.0491071
141	0.00399202	141	0.982036	141	0.011976				141	0.0530303	141	0.954545	141	0.0227273	141	0.030303				141	0.0133929	141	0.933036	141	0.0491071
142	0.00399202	142	0.99002	142	0.011976				142	0.0530303	142	0.969697	142	0.0227273	142	0.030303				142	0.0133929	142	0.9375	142	0.0535714
143	0.00399202	143	0.99002	143	0.011976				143	0.0530303	143	0.977273	143	0.0227273	143	0.030303				143	0.0133929	143	0.955357	143	0.0535714
144	0.00399202	144	0.992016	144	0.011976				144	0.0606061	144	0.984848	144	0.0227273	144	0.030303				144	0.0133929	144	0.955357	144	0.0535714
145	0.00399202	145	0.992016	145	0.0139721				145	0.0606061	145	0.984848	145	0.0227273	145	0.0378788				145	0.0133929	145	0.96875	145	0.0535714
146	0.00399202	146	0.996008	146	0.0139721				146	0.0606061	146	0.984848	146	0.030303	146	0.0378788				146	0.0133929	146	0.96875	146	0.0535714
147	0.00399202	147	0.996008	147	0.0139721				147	0.0606061	147	0.984848	147	0.0378788	147	0.0378788				147	0.0133929	147	0.982143	147	0.0535714
148	0.00399202	148	0.996008	148	0.0139721				148	0.0606061	148	0.984848	148	0.0378788	148	0.0454545				148	0.0133929	148	0.982143	148	0.0535714
149	0.00399202	149	0.996008	149	0.0139721				149	0.0606061	149	0.992424	149	0.0378788	149	0.0454545				149	0.0133929	149	1	149	0.0535714
150	0.00399202	150	1	150	0.0139721				150	0.0606061	150	1	150	0.0378788	150	0.0454545				150	0.0133929	150	1	150	0.0535714
151	0.00399202	151	1	151	0.0139721				151	0.0606061	151	1	151	0.0378788	151	0.0454545				151	0.0133929	151	1.01786	151	0.0535714
152	0.00399202	152	1.002	152	0.0159681				152	0.0606061	152	1.00758	152	0.0378788	152	0.0454545				152	0.0133929	152	1.01786	152	0.0535714
153	0.00598802	153	1.002	153	0.0159681				153	0.0606061	153	1.00758	153	0.0378788	153	0.0454545				153	0.0133929	153	1.03571	153	0.0535714
154	0.00598802	154	1.00599	154	0.0179641				154	0.0606061	154	1.01515	154	0.0378788	154	0.0454545				154	0.0133929	154	1.03571	154	0.0535714
155	0.00598802	155	1.00599	155	0.0179641				155	0.0606061	155	1.01515	155	0.0378788	155	0.0530303				155	0.0133929	155	1.04911	155	0.0535714
156	0.00598802	156	1.00998	156	0.0179641				156	0.0606061	156	1.02273	156	0.0378788	156	0.0530303				156	0.0133929	156	1.04911	156	0.0580357
157	0.00598802	157	1.00998	157	0.0179641				157	0.0606061	157	1.02273	157	0.0454545	157	0.0530303				157	0.0133929	157	1.05804	157	0.0580357
158	0.00598802	158	1.01198	158	0.0179641				158	0.0606061	158	1.03788	158	0.0454545	158	0.0530303				158	0.0133929	158	1.05804	158	0.0580357
159	0.00598802	159	1.01198	159	0.0199601				159	0.0606061	159	1.03788	159	0.0454545	159	0.0530303				159	0.0133929	159	1.05804	159	0.0580357
160	0.00598802	160	1.01198	160	0.0199601				160	0.0606061	160	1.03788	160	0.0454545	160	0.0530303				160	0.0133929	160	1.05804	160	0.0580357
161	0.00598802	161	1.01198	161	0.0199601				161	0.0606061	161	1.03788	161	0.0454545	161	0.0530303				161	0.0133929	161	1.0625	161	0.0580357
162	0.011976	162	1.01597	162	0.0199601				162	0.0606061	162	1.05303	162	0.0454545	162	0.0530303				162	0.0133929	162	1.0625	162	0.0625
163	0.011976	163	1.01597	163	0.0199601				163	0.0606061	163	1.06061	163	0.0530303	163	0.0530303				163	0.0133929	163	1.07143	163	0.0625
164	0.011976	164	1.01796	164	0.0199601				164	0.0606061	164	1.07576	164	0.0530303	164	0.0530303				164	0.0133929	164	1.07143	164	0.0625
165	0.011976	165	1.01796	165	0.0199601				165	0.0606061	165	1.08333	165	0.0530303	165	0.0606061				165	0.0133929	165	1.08929	165	0.0625
166	0.0139721	166	1.01796	166	0.0199601				166	0.0606061	166	1.09091	166	0.0530303	166	0.0606061				166	0.0133929	166	1.08929	166	0.0625
167	0.0139721	167	1.01796	167	0.0199601				167	0.0606061	167	1.09091	167	0.0530303	167	0.0606061				167	0.0133929	167	1.10268	167	0.0625
168	0.0139721	168	1.01996	168	0.0199601				168	0.0681818	168	1.10606	168	0.0530303	168	0.0606061				168	0.0133929	168	1.10268	168	0.0625
169	0.0179641	169	1.01996	169	0.0219561				169	0.0681818	169	1.11364	169	0.0530303	169	0.0606061				169	0.0133929	169	1.12054	169	0.0625
170	0.0179641	170	1.01996	170	0.0219561				170	0.0681818	170	1.12121	170	0.0530303	170	0.0606061				170	0.0133929	170	1.12054	170	0.0625
171	0.0179641	171	1.01996	171	0.0219561				171	0.0681818	171	1.12121	171	0.0530303	171	0.0606061				171	0.0133929	171	1.125	171	0.0625
172	0.0179641	172	1.01996	172	0.0219561				172	0.0681818	172	1.13636	172	0.0530303	172	0.0606061				172	0.0133929	172	1.125	172	0.0625
173	0.0179641	173	1.01996	173	0.0219561				173	0.0681818	173	1.13636	173	0.0530303	173	0.0606061				173	0.0133929	173	1.13839	173	0.0625
174	0.0179641	174	1.02196	174	0.0219561				174	0.0681818	174	1.14394	174	0.0530303	174	0.0606061				174	0.0133929	174	1.13839	174	0.0625
175	0.0179641	175	1.02196	175	0.0219561				175	0.0681818	175	1.14394	175	0.0530303	175	0.0606061				175	0.0133929	175	1.13839	175	0.0625
176	0.0179641			176	0.0219561				176	0.0681818	176	1.14394	176	0.0530303	176	0.0606061				176	0.0178571	176	1.13839	176	0.0625
177	0.0179641			177	0.0219561				177	0.0681818	177	1.14394	177	0.0606061	177	0.0606061				177	0.0178571	177	1.14732	177	0.0625
178	0.0179641			178	0.0219561				178	0.0681818	178	1.15152	178	0.0606061	178	0.0606061				178	0.0178571	178	1.14732	178	0.0625
179	0.0179641			179	0.0219561				179	0.0681818	179	1.15152	179	0.0606061	179	0.0606061				179	0.0178571	179	1.15625	179	0.0625
180	0.0179641			180	0.0219561				180	0.0681818	180	1.17424	180	0.0606061	180	0.0606061				180	0.0178571	180	1.15625	180	0.0625
181	0.0179641			181	0.0219561				181	0.0681818	181	1.17424	181	0.0606061	181	0.0606061				181	0.0178571	181	1.16964	181	0.0625
182	0.0179641			182	0.0219561				182	0.0681818	182	1.17424	182	0.0606061	182	0.0606061				182	0.0178571	182	1.17411	182	0.0625
183	0.0179641			183	0.0219561				183	0.0681818	183	1.17424	183	0.0606061	183	0.0606061				183	0.0178571	183	1.17857	183	0.0625
184	0.0179641			184	0.0219561				184	0.0681818	184	1.18939	184	0.0606061	184	0.0606061				184	0.0178571	184	1.17857	184	0.0625
185	0.0179641			185	0.0219561				185	0.0681818	185	1.18939	185	0.0606061	185	0.0606061				185	0.0178571	185	1.1875	185	0.0625
186	0.0179641			186	0.0219561				186	0.0681818	186	1.19697	186	0.0606061	186	0.0606061				186	0.0178571	186	1.19196	186	0.0669643
187	0.0179641			187	0.0219561				187	0.0681818	187	1.19697	187	0.0606061	187	0.0606061				187	0.0178571	187	1.19196	187	0.0669643
188	0.0199601			188	0.0239521				188	0.0681818	188	1.21212	188	0.0606061	188	0.0606061				188	0.0178571	188	1.19196	188	0.0669643
189	0.0199601			189	0.0239521				189	0.0681818	189	1.2197	189	0.0606061	189	0.0606061				189	0.0178571	189	1.19196	189	0.0669643
190	0.0199601			190	0.0239521				190	0.0681818	190	1.22727	190	0.0606061	190	0.0681818				190	0.0178571	190	1.19196	190	0.0669643
191	0.0199601			191	0.0239521				191	0.0681818	191	1.22727	191	0.0606061	191	0.0681818				191	0.0178571	191	1.20089	191	0.0669643
192	0.0199601			192	0.0239521				192	0.0681818	192	1.22727	192	0.0606061	192	0.0757576				192	0.0178571	192	1.20536	192	0.0669643
193	0.0199601			193	0.0239521				193	0.0681818	193	1.22727	193	0.0606061	193	0.0757576				193	0.0178571	193	1.20536	193	0.0669643
194	0.0219561			194	0.0239521				194	0.0681818	194	1.23485	194	0.0606061	194	0.0757576				194	0.0178571	194	1.20536	194	0.0669643
195	0.0219561			195	0.0239521				195	0.0681818	195	1.23485	195	0.0606061	195	0.0757576				195	0.0178571	195	1.20982	195	0.0669643
196	0.0219561			196	0.0239521				196	0.0681818	196	1.25	196	0.0681818	196	0.0757576				196	0.0178571	196	1.20982	196	0.0669643
197	0.0219561			197	0.0239521				197	0.0681818	197	1.25	197	0.0681818	197	0.0757576				197	0.0178571	197	1.20982	197	0.0669643
198	0.0219561			198	0.0239521				198	0.0681818	198	1.25758	198	0.0681818	198	0.0757576				198	0.0178571	198	1.21429	198	0.0669643
199	0.0219561			199	0.0239521				199	0.0681818	199	1.25758	199	0.0681818	199	0.0757576				199	0.0178571	199	1.22321	199	0.0669643
200	0.0219561			200	0.0239521				200	0.0757576	200	1.26515	200	0.0681818	200	0.0833333				200	0.0178571	200	1.22321	200	0.0714286
201	0.0219561			201	0.0239521				201	0.0757576	201	1.26515	201	0.0833333	201	0.0909091				201	0.0178571	201	1.22768	201	0.0714286
202	0.0219561			202	0.0239521				202	0.0757576	202	1.26515	202	0.0833333	202	0.0909091				202	0.0178571	202	1.22768	202	0.0714286
203	0.0219561			203	0.0239521				203	0.0757576	203	1.26515	203	0.0833333	203	0.0909091				203	0.0178571	203	1.23214	203	0.0714286
204	0.0219561			204	0.0239521				204	0.0833333	204	1.28788	204	0.0833333	204	0.0909091				204	0.0178571	204	1.23214	204	0.0714286
205	0.0219561			205	0.0239521				205	0.0833333	205	1.28788	205	0.0833333	205	0.0909091				205	0.0178571	205	1.24107	205	0.0714286
206	0.0219561			206	0.0239521				206	0.0833333	206	1.28788	206	0.0833333	206	0.0984848				206	0.0178571	206	1.24107	206	0.0714286
207	0.0219561			207	0.0239521				207	0.0833333	207	1.28788	207	0.0833333	207	0.0984848				207	0.0178571	207	1.25	207	0.0714286
208	0.0219561			208	0.0239521				208	0.0833333	208	1.30303	208	0.0833333	208	0.0984848				208	0.0178571	208	1.25	208	0.0714286
209	0.0219561			209	0.0239521				209	0.0833333	209	1.30303	209	0.0833333	209	0.0984848				209	0.0178571	209	1.25446	209	0.0714286
210	0.0219561			210	0.0239521				210	0.0833333	210	1.31061	210	0.0833333	210	0.0984848				210	0.0223214	210	1.25446	210	0.0714286
211	0.0219561			211	0.0239521				211	0.0833333	211	1.31061	211	0.0833333	211	0.0984848				211	0.0223214	211	1.25893	211	0.0714286
212	0.0219561			212	0.0239521				212	0.0833333	212	1.31061	212	0.0833333	212	0.0984848				212	0.0223214	212	1.25893	212	0.0714286
213	0.0219561			213	0.0239521				213	0.0833333	213	1.31061	213	0.0833333	213	0.0984848				213	0.0223214	213	1.26786	213	0.0714286
214	0.0219561			214	0.0239521				214	0.0833333	214	1.31061	214	0.0833333	214	0.0984848				214	0.0223214	214	1.26786	214	0.0714286
215	0.0219561			215	0.0239521				215	0.0833333	215	1.31061	215	0.0833333	215	0.0984848				215	0.0223214	215	1.26786	215	0.0714286
216	0.0239521			216	0.0259481				216	0.0833333	216	1.32576	216	0.0833333	216	0.0984848				216	0.0223214	216	1.26786	216	0.0758929
217	0.0239521			217	0.0279441				217	0.0833333	217	1.32576	217	0.0833333	217	0.0984848				217	0.0223214	217	1.26786	217	0.0758929
218	0.0239521			218	0.0279441				218	0.0833333	218	1.34091	218	0.0833333	218	0.0984848				218	0.0223214	218	1.26786	218	0.0758929
219	0.0239521			219	0.0279441				219	0.0833333	219	1.34091	219	0.0833333	219	0.0984848				219	0.0223214	219	1.26786	219	0.0758929
220	0.0239521			220	0.0279441				220	0.0833333	220	1.34091	220	0.0833333	220	0.0984848				220	0.0223214	220	1.26786	220	0.0758929
221	0.0239521			221	0.0279441				221	0.0833333	221	1.34091	221	0.0833333	221	0.0984848				221	0.0223214	221	1.27232	221	0.0758929
222	0.0239521			222	0.0279441				222	0.0833333	222	1.35606	222	0.0833333	222	0.0984848				222	0.0223214	222	1.27232	222	0.0758929
223	0.0239521			223	0.0279441				223	0.0833333	223	1.35606	223	0.0833333	223	0.0984848				223	0.0223214	223	1.27232	223	0.0758929
224	0.0239521			224	0.0279441				224	0.0833333	224	1.35606	224	0.0833333	224	0.0984848				224	0.0223214	224	1.27232	224	0.0758929
225	0.0239521			225	0.0279441				225	0.0833333	225	1.36364	225	0.0833333	225	0.0984848				225	0.0223214	225	1.27232	225	0.0758929
226	0.0239521			226	0.0279441				226	0.0909091	226	1.37121	226	0.0833333	226	0.0984848				226	0.0223214	226	1.27232	226	0.0803571
227	0.0239521			227	0.0279441				227	0.0909091	227	1.37121	227	0.0833333	227	0.0984848				227	0.0223214	227	1.28125	227	0.0803571
228	0.0259481			228	0.0279441				228	0.0909091	228	1.37121	228	0.0833333	228	0.0984848				228	0.0223214	228	1.28125	228	0.0848214
229	0.0259481			229	0.0279441				229	0.0909091	229	1.37121	229	0.0833333	229	0.0984848				229	0.0223214	229	1.28571	229	0.0848214
230	0.0259481			230	0.0279441				230	0.0984848	230	1.37879	230	0.0833333	230	0.0984848				230	0.0223214	230	1.28571	230	0.0848214
231	0.0259481			231	0.0279441				231	0.0984848	231	1.37879	231	0.0833333	231	0.0984848				231	0.0223214			231	0.0848214
232	0.0259481			232	0.0279441				232	0.0984848	232	1.37879	232	0.0833333	232	0.0984848				232	0.0223214			232	0.0848214
233	0.0259481			233	0.0279441				233	0.0984848	233	1.37879	233	0.0833333	233	0.0984848				233	0.0223214			233	0.0848214
234	0.0279441			234	0.0279441				234	0.0984848	234	1.37879	234	0.0833333	234	0.0984848				234	0.0223214			234	0.0848214
235	0.0279441			235	0.0279441				235	0.0984848	235	1.37879	235	0.0833333	235	0.0984848				235	0.0223214			235	0.0848214
236	0.0279441			236	0.0299401				236	0.0984848	236	1.39394	236	0.0833333	236	0.0984848				236	0.0223214			236	0.0848214
237	0.0279441			237	0.0299401				237	0.0984848	237	1.39394	237	0.0909091	237	0.106061				237	0.0223214			237	0.0848214
238	0.0279441			238	0.0319361				238	0.0984848	238	1.39394	238	0.0909091	238	0.106061				238	0.0267857			238	0.0848214
239	0.0279441			239	0.0319361				239	0.0984848	239	1.39394	239	0.0909091	239	0.106061				239	0.0267857			239	0.0848214
240	0.0279441			240	0.0319361				240	0.0984848	240	1.40909	240	0.0909091	240	0.113636				240	0.0267857			240	0.0848214
241	0.0279441			241	0.0319361				241	0.0984848	241	1.40909	241	0.0909091	241	0.113636				241	0.0267857			241	0.0848214
242	0.0299401			242	0.0339321				242	0.0984848	242	1.41667	242	0.0909091	242	0.113636				242	0.0267857			242	0.0848214
243	0.0299401			243	0.0339321				243	0.0984848	243	1.41667	243	0.0909091	243	0.113636				243	0.0267857			243	0.0848214
244	0.0299401			244	0.0339321				244	0.0984848	244	1.42424	244	0.0909091	244	0.113636				244	0.0267857			244	0.0848214
245	0.0299401			245	0.0339321				245	0.0984848	245	1.42424	245	0.0909091	245	0.113636				245	0.0267857			245	0.0848214
246	0.0299401			246	0.0339321				246	0.0984848	246	1.43182	246	0.0909091	246	0.113636				246	0.0267857			246	0.0892857
247	0.0299401			247	0.0359281				247	0.0984848	247	1.43182	247	0.0909091	247	0.113636				247	0.0267857			247	0.0892857
248	0.0299401			248	0.0359281				248	0.0984848	248	1.43939	248	0.0909091	248	0.113636				248	0.0267857			248	0.09375
249	0.0299401			249	0.0359281				249	0.0984848	249	1.43939	249	0.0909091	249	0.113636				249	0.0267857			249	0.09375
250	0.0299401			250	0.0359281				250	0.0984848	250	1.44697	250	0.0909091	250	0.113636				250	0.0267857			250	0.09375
251	0.0299401			251	0.0359281				251	0.0984848	251	1.44697	251	0.0909091	251	0.113636				251	0.0267857			251	0.09375
252	0.0299401			252	0.0359281				252	0.0984848	252	1.44697	252	0.0909091	252	0.113636				252	0.0267857			252	0.09375
253	0.0299401			253	0.0379242				253	0.0984848	253	1.44697	253	0.0909091	253	0.113636				253	0.0267857			253	0.09375
254	0.0299401			254	0.0379242				254	0.0984848	254	1.44697	254	0.0909091	254	0.113636				254	0.0267857			254	0.09375
255	0.0299401			255	0.0379242				255	0.0984848	255	1.44697	255	0.0909091	255	0.113636				255	0.0267857			255	0.0982143
256	0.0299401			256	0.0379242				256	0.0984848	256	1.45455	256	0.0909091	256	0.113636				256	0.0267857			256	0.0982143
257	0.0299401			257	0.0379242				257	0.0984848	257	1.45455	257	0.0909091	257	0.113636				257	0.0267857			257	0.0982143
258	0.0299401			258	0.0379242				258	0.0984848	258	1.46212	258	0.0984848	258	0.113636				258	0.0267857			258	0.0982143
259	0.0299401			259	0.0379242				259	0.0984848	259	1.46212	259	0.0984848	259	0.113636				259	0.0267857			259	0.0982143
260	0.0299401			260	0.0379242				260	0.0984848	260	1.46212	260	0.0984848	260	0.113636				260	0.0267857			260	0.0982143
261	0.0299401			261	0.0379242				261	0.0984848	261	1.46212	261	0.0984848	261	0.113636				261	0.0267857			261	0.0982143
262	0.0299401			262	0.0379242				262	0.0984848	262	1.46212	262	0.0984848	262	0.113636				262	0.0267857			262	0.0982143
263	0.0299401			263	0.0379242				263	0.0984848	263	1.46212	263	0.0984848	263	0.113636				263	0.0267857			263	0.0982143
264	0.0299401			264	0.0379242				264	0.0984848	264	1.46212	264	0.0984848	264	0.113636				264	0.0267857			264	0.0982143
265	0.0299401			265	0.0379242				265	0.0984848	265	1.46212	265	0.0984848	265	0.113636				265	0.0267857			265	0.0982143
266	0.0319361			266	0.0379242				266	0.0984848	266	1.46212	266	0.0984848	266	0.121212				266	0.0267857			266	0.0982143
267	0.0319361			267	0.0379242				267	0.0984848	267	1.46212	267	0.0984848	267	0.121212				267	0.0267857			267	0.0982143
268	0.0319361			268	0.0379242				268	0.0984848	268	1.46212	268	0.0984848	268	0.128788				268	0.0267857			268	0.0982143
269	0.0319361			269	0.0379242				269	0.0984848	269	1.46212	269	0.0984848	269	0.128788				269	0.0267857			269	0.0982143
270	0.0319361			270	0.0379242				270	0.0984848	270	1.46212	270	0.0984848	270	0.128788				270	0.0267857			270	0.0982143
271	0.0319361			271	0.0379242				271	0.0984848	271	1.46212	271	0.106061	271	0.128788				271	0.0267857			271	0.0982143
272	0.0339321			272	0.0379242				272	0.0984848	272	1.46212	272	0.106061	272	0.128788				272	0.0267857			272	0.102679
273	0.0339321			273	0.0379242				273	0.0984848	273	1.46212	273	0.106061	273	0.128788				273	0.0267857			273	0.102679
274	0.0339321			274	0.0399202				274	0.0984848	274	1.46212	274	0.106061	274	0.128788				274	0.0267857			274	0.102679
275	0.0339321			275	0.0399202				275	0.0984848	275	1.46212	275	0.106061	275	0.128788				275	0.0267857			275	0.102679
276	0.0339321			276	0.0399202				276	0.0984848	276	1.46212	276	0.106061	276	0.128788				276	0.0267857			276	0.102679
277	0.0339321			277	0.0399202				277	0.0984848	277	1.46212	277	0.106061	277	0.128788				277	0.0267857			277	0.102679
278	0.0339321			278	0.0399202				278	0.0984848	278	1.46212	278	0.106061	278	0.128788				278	0.0267857			278	0.102679
279	0.0339321			279	0.0399202				279	0.0984848	279	1.46212	279	0.106061	279	0.128788				279	0.0267857			279	0.102679
280	0.0339321			280	0.0419162				280	0.0984848	280	1.4697	280	0.106061	280	0.128788				280	0.0267857			280	0.102679
281	0.0339321			281	0.0419162				281	0.0984848	281	1.4697	281	0.106061	281	0.128788				281	0.0267857			281	0.102679
282	0.0339321			282	0.0419162				282	0.106061			282	0.113636	282	0.128788				282	0.0267857			282	0.102679
283	0.0339321			283	0.0419162				283	0.106061			283	0.113636	283	0.128788				283	0.0267857			283	0.102679
284	0.0339321			284	0.0419162				284	0.106061			284	0.121212	284	0.136364				284	0.0267857			284	0.102679
285	0.0339321			285	0.0419162				285	0.106061			285	0.121212	285	0.136364				285	0.0267857			285	0.102679
286	0.0339321			286	0.0419162				286	0.106061			286	0.121212	286	0.136364				286	0.0267857			286	0.102679
287	0.0339321			287	0.0419162				287	0.106061			287	0.121212	287	0.136364				287	0.0267857			287	0.102679
288	0.0339321			288	0.0419162				288	0.113636			288	0.121212	288	0.136364				288	0.0267857			288	0.102679
289	0.0339321			289	0.0419162				289	0.113636			289	0.121212	289	0.136364				289	0.0267857			289	0.102679
290	0.0339321			290	0.0439122				290	0.113636			290	0.121212	290	0.143939				290	0.0267857			290	0.102679
291	0.0339321			291	0.0439122				291	0.113636			291	0.121212	291	0.143939				291	0.0267857			291	0.102679
292	0.0339321			292	0.0439122				292	0.113636			292	0.121212	292	0.143939				292	0.0267857			292	0.102679
293	0.0339321			293	0.0439122				293	0.113636			293	0.121212	293	0.143939				293	0.0267857			293	0.102679
294	0.0339321			294	0.0439122				294	0.121212			294	0.121212	294	0.143939				294	0.0267857			294	0.102679
295	0.0339321			295	0.0439122				295	0.121212			295	0.121212	295	0.143939				295	0.0267857			295	0.102679
296	0.0339321			296	0.0439122				296	0.121212			296	0.121212	296	0.143939				296	0.0267857			296	0.107143
297	0.0339321			297	0.0439122				297	0.121212			297	0.121212	297	0.151515				297	0.0267857			297	0.107143
298	0.0339321			298	0.0459082				298	0.128788			298	0.121212	298	0.151515				298	0.0267857			298	0.107143
299	0.0339321			299	0.0459082				299	0.128788			299	0.121212	299	0.151515				299	0.0267857			299	0.107143
